# Supplementary material
Source: publisher site journal article supplement (https://www.dovepress.com/article/340574)

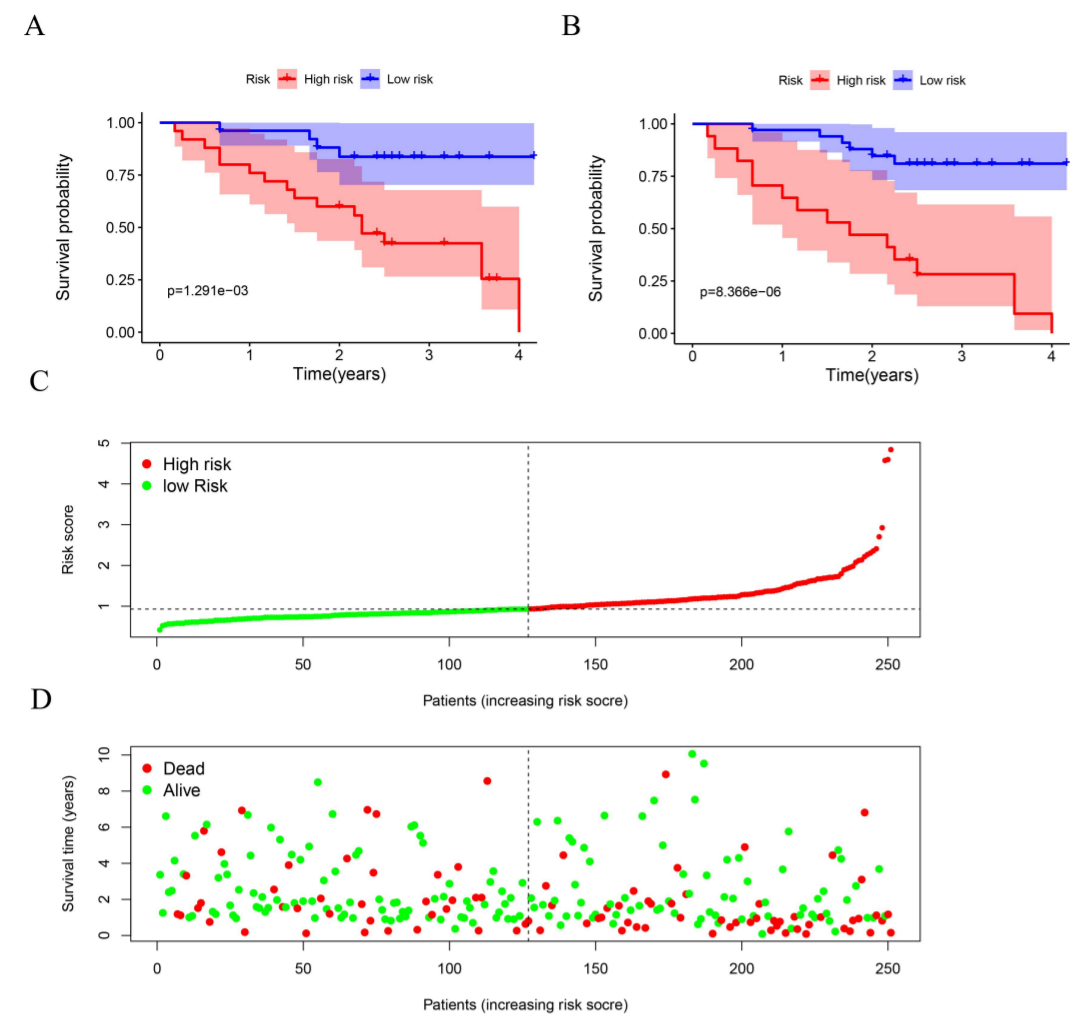

Supplement Figure 1. The prognostic differences in the high-risk and low-risk groups. A: Kaplan-Meier analysis based on the median cutoff value, P value less than 0.05 was considered significant. B:Kaplan-Meier analysis based on the best cutoff value. C:Risk score distribution plot in HCC patients. D: Risk score distribution plotsurvival status in HCC patients.

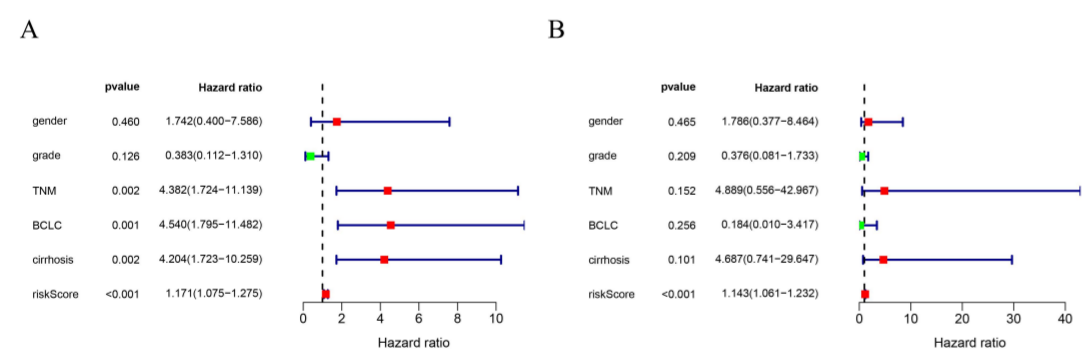

Supplement Figure 2. Regression analysis based on clinical dataset. A:Univariate Cox regression analysis. B: Multivariate Cox regression analysis.

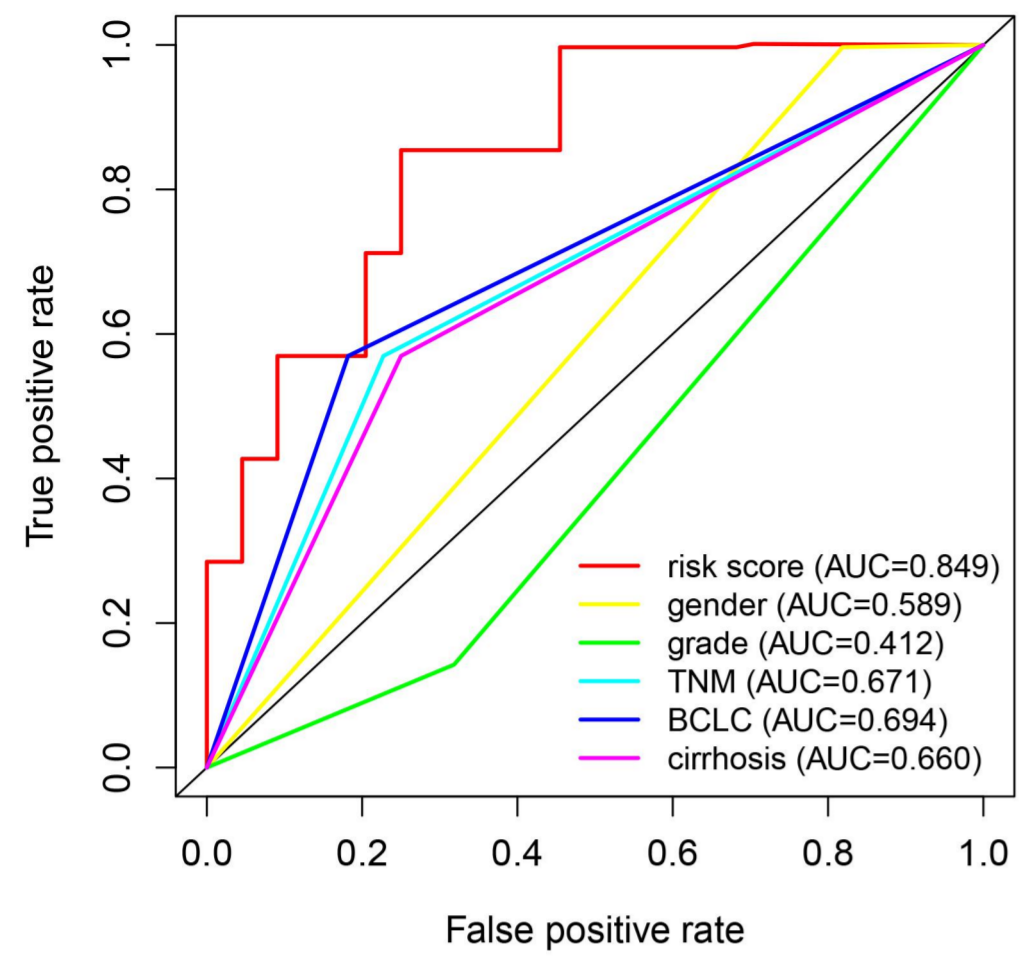

Supplement Figure 3. ROC curve of the risk score and clinical features based on clinical dataset.

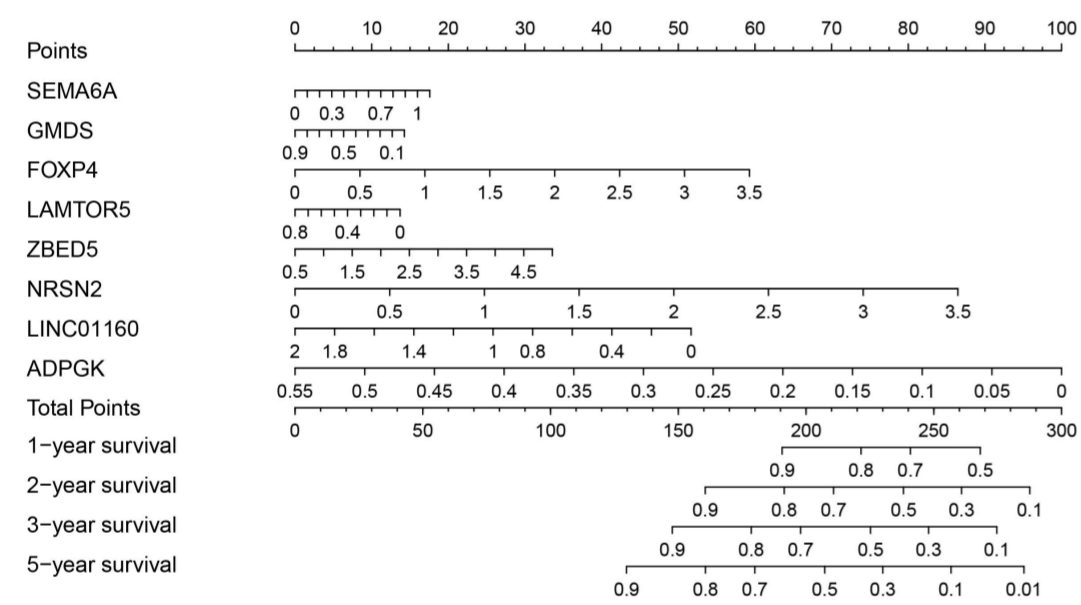

Supplement Figure 4. Nomogram that integrated both the risk signature and various clinicopathologic risk factors.

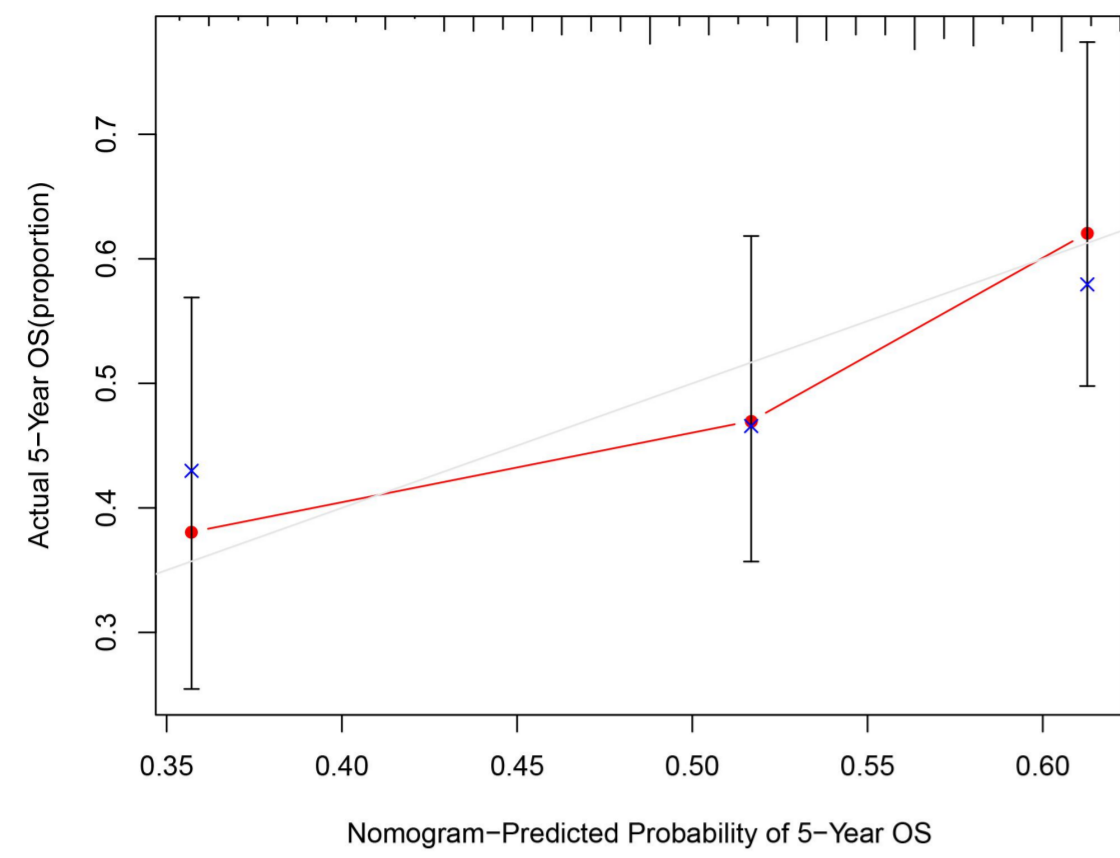

Supplement Figure 5. Calibration curve of Nomogram.

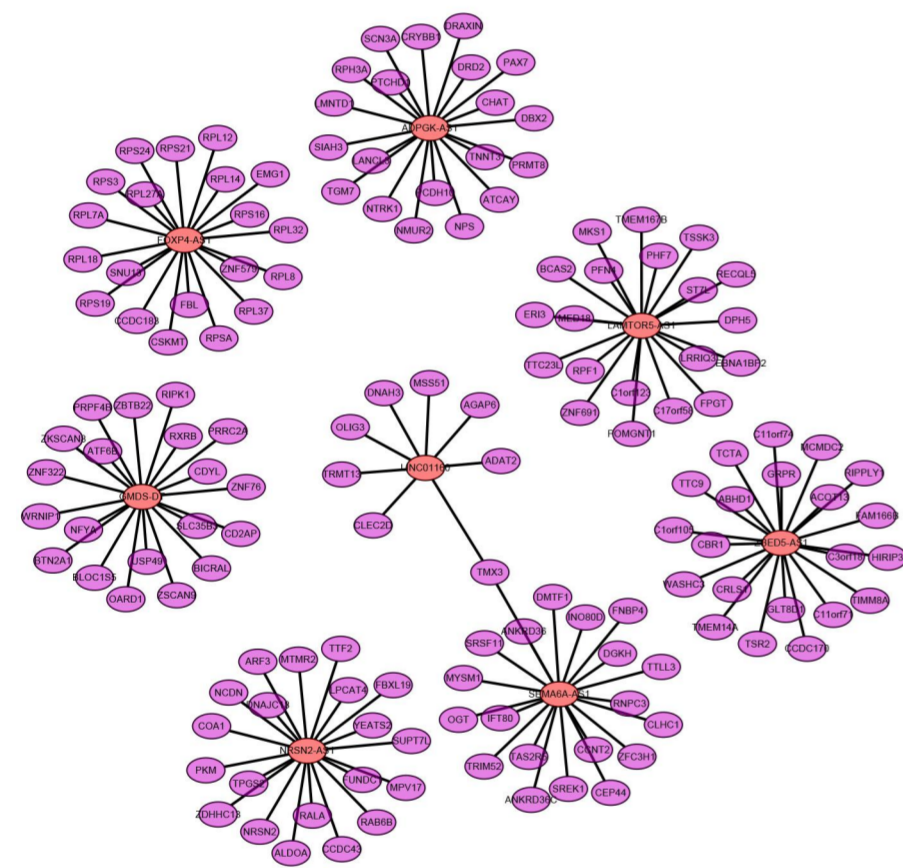

Supplement Figure 6. Visualization of the correlation between the expression level of the 8 lncRNAs and each protein coding genes (PCGs) using cytoscape.

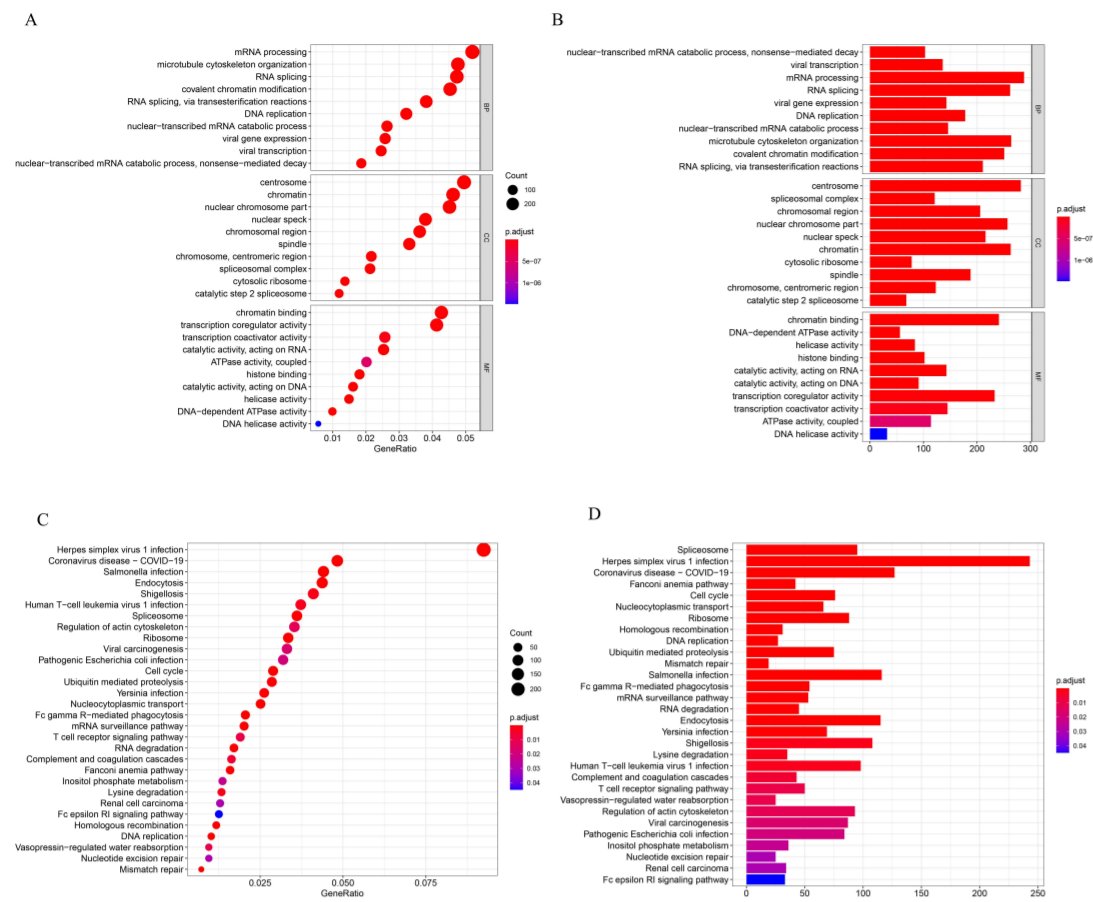

Supplement Figure 7. Gene Ontology (GO) pathway analysis and Kyoto Encyclopedia of Genes and Genomes (KEGG) pathway analysis of the differentially expressed 8 lncRNAs. A: Barplot of GO pathway analysis; B: Dotplot of GO pathway analysis; C: Barplot of KEGG analysis; D: Dotplot of KEGG analysis

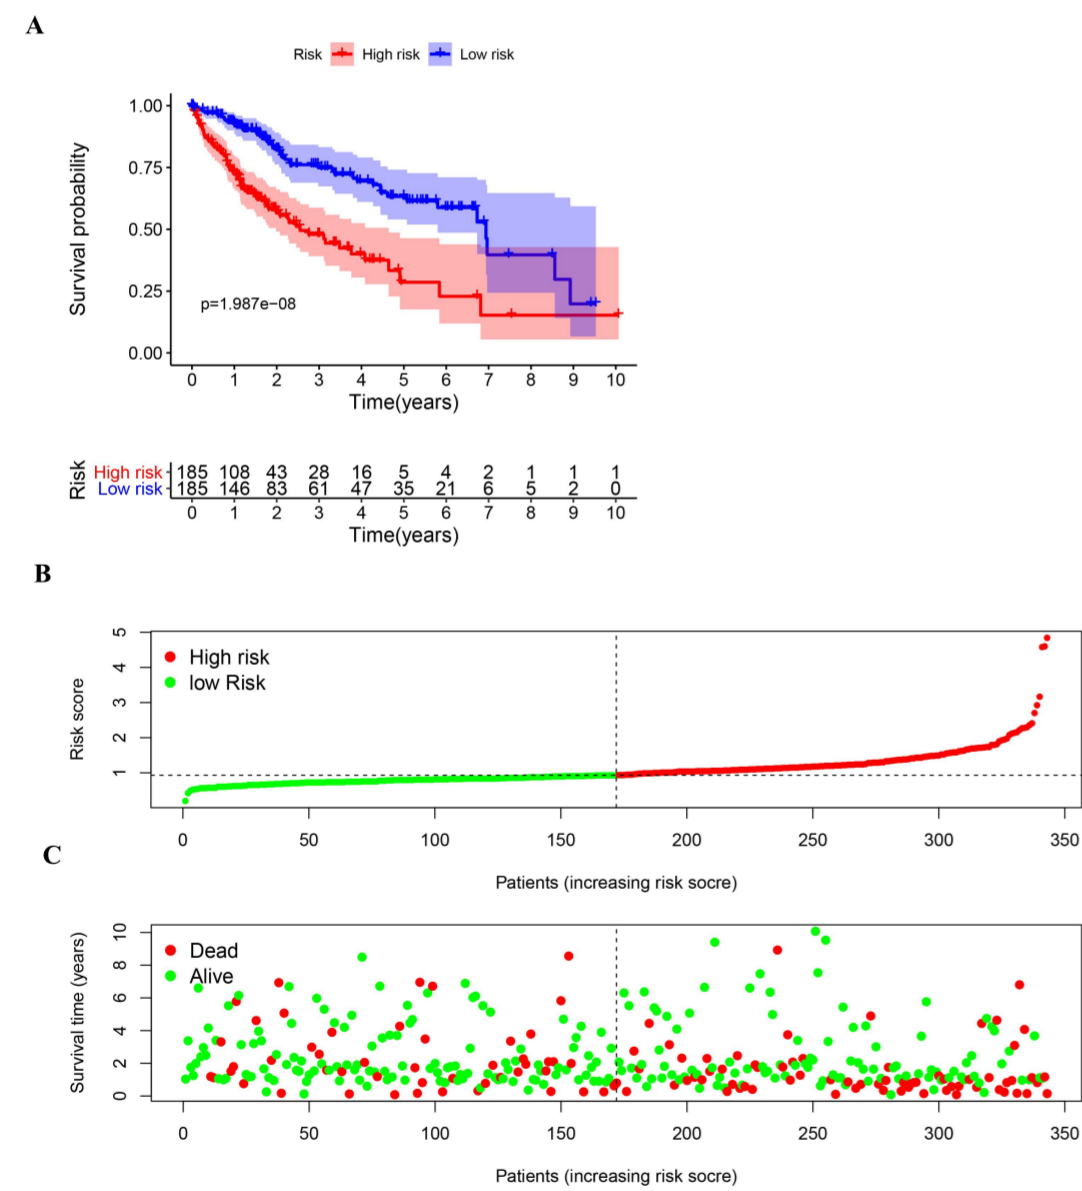

Supplement Figure 8. The prognostic differences in the high-risk and low-risk groups based on TCGA dataset. A: Kaplan-Meier analysis, P value less than 0.05 was considered significant. B: Risk score distribution plot in HCC patients. C: Risk score distribution plots survival status in HCC patients.

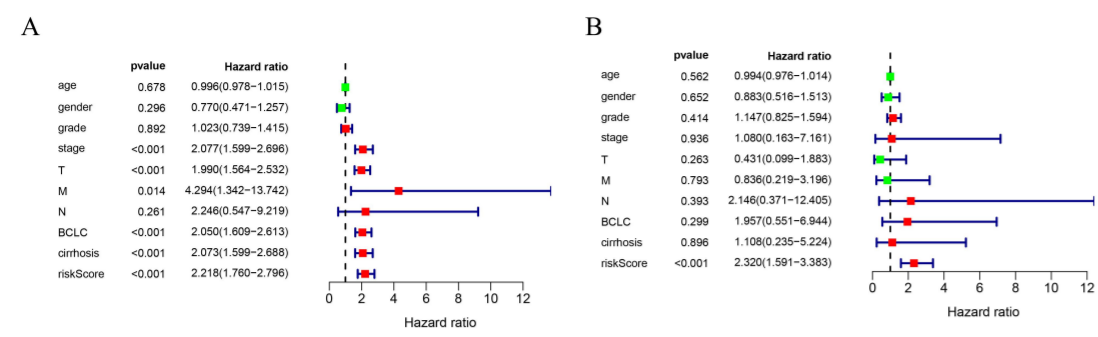

Supplement Figure 9. Regression analysis based on TCGA dataset. A: Univariate Cox regression analysis. B: Multivariate Cox regression analysis.

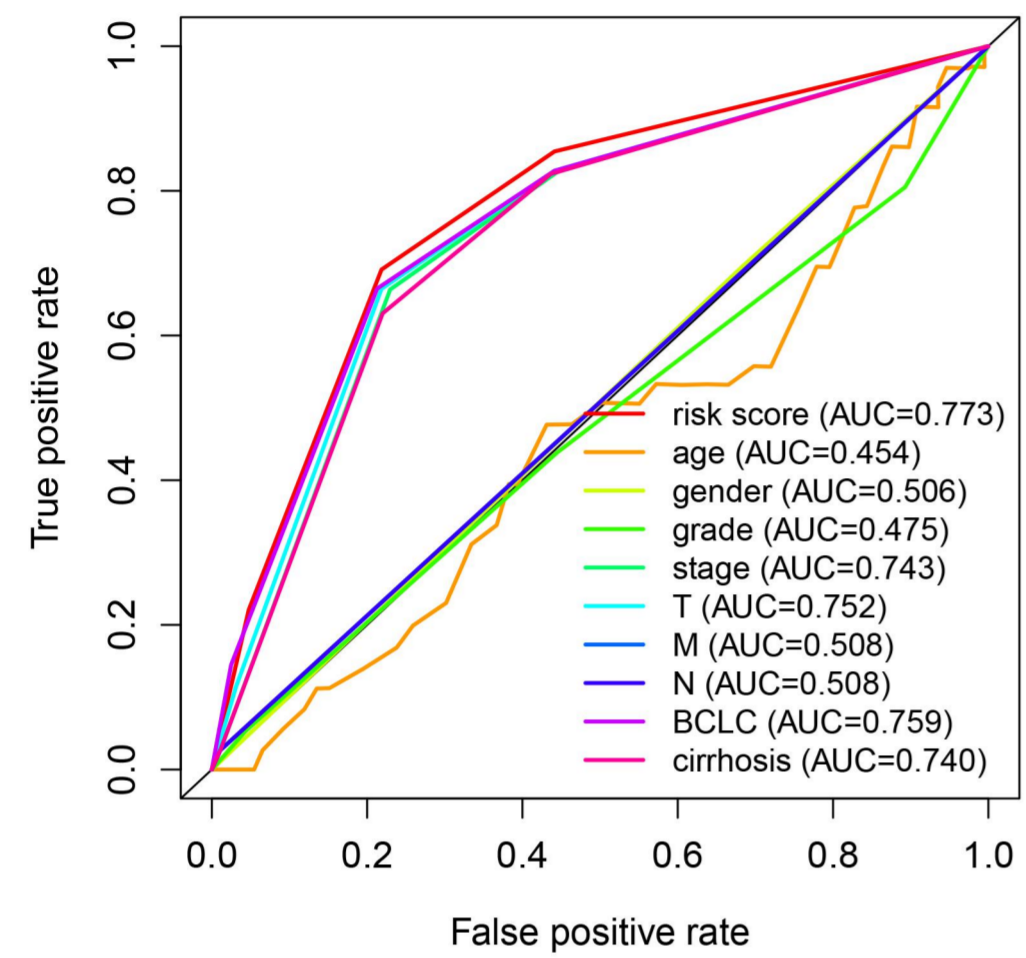

Supplement Figure 10. ROC curve of the risk score and clinical features based on TCGA dataset.

**Supplement File: Supplement tables 1-4**

**Supplement table 1. The clinicopathological features of 251 HCC patients**

| Variable                     | N   |
|------------------------------|-----|
| <b>Sex</b>                   |     |
| Female                       | 35  |
| Male                         | 216 |
| <b>Age, years</b>            |     |
| ≤60                          | 207 |
| >60                          | 44  |
| <b>Liver cirrhosis</b>       |     |
| No                           | 27  |
| Yes                          | 224 |
| <b>Lymph node metastasis</b> |     |
| No                           | 212 |
| Yes                          | 39  |
| <b>Number of tumor</b>       |     |
| < 3                          | 205 |
| ≥ 3                          | 46  |
| <b>Size of tumor, cm</b>     |     |
| < 5                          | 100 |
| ≥ 5                          | 151 |
| <b>Metastasis</b>            |     |
| No                           | 212 |
| Yes                          | 39  |
| <b>BCLC stage</b>            |     |
| 0/A                          | 135 |
| B/C                          | 116 |
| <b>TNM</b>                   |     |
| I/II                         | 158 |
| III/IV                       | 90  |

**Supplement table 2 Primers used for quantitative real-time PCR**

| Gene        | Primer sequence                         |
|-------------|-----------------------------------------|
| GMDS-DT     | Forward 5'-TTGCTCCTCATTTCAGTGTC-3'      |
|             | Reverse 5'-TCAGGTGTCCAGGGTAAGA-3'       |
| NRSN2-AS1   | Forward 5'-CGGAGACGCAGGTCCAGAGGGAT-3'   |
|             | Reverse 5'-TATGCATCAACTGTTTATTGAAAGG-3' |
| FOXP4-AS1   | Forward 5'-GTGAGCTTCTGGGTTTCGACA-3'     |
|             | Reverse 5'-ATTGAGGGTTAGGGCAGCAC-3'      |
| LAMTOR5-AS1 | Forward TGGCATTGTGAAGAGTGTC             |
|             | Reverse TTCCA AAAGACATCAAGACTC          |
| SEMA6A-AS1  | Forward 5'-GATTGATGAATGCTGGGGAG-3'      |
|             | Reverse 5'-TGAGGAAAAACCGCACTTAG-3'      |
| ADPGK-AS1   | Forward 5'-GCCGATGTCGACACAAGCG-3'       |
|             | Reverse 5'-AGCAAATGTGTTCCCATCCCT-3'     |
| LINC01160   | Forward: 5'-AGGAAGCAGTGCCGAATG-3'       |
|             | Reverse: 5'-AGGTGGAGCTAAATTGAGGG-3'     |
| ZBED5-AS1   | Forward 5'- TCGGGTGGGAAGTCGTTGC-3'      |
|             | Reverse 5'- CCTCCGCTTGCTCCCTTT-3'       |
| β-actin     | Forward 5'-GGGAAATCGTGCGTGACATTAAG-3'   |
|             | Reverse 5'- TGTGTTGGCGTACAGGTCTTTG-3'   |

**Supplement table 3 Associations between the expression levels of the differentially expressed macrophage-associated lncRNAs and the clinicopathological characteristics of the patients with hepatocellular carcinoma based on clinical dataset**

| id          | BCLC          | cirrhosis     | gender               | grade                  | TNM           |
|-------------|---------------|---------------|----------------------|------------------------|---------------|
| LINC01160   | 1.823(0.075)  | -0.264(0.794) | <u>-2.255(0.029)</u> | 1.591(0.119)           | -0.196(0.847) |
| SEMA6A-AS1  | -0.413(0.686) | -0.943(0.359) | <u>-2.402(0.020)</u> | 1.48(0.145)            | 0.207(0.838)  |
| FOXP4-AS1   | 0.297(0.769)  | -0.607(0.550) | <u>-3.139(0.003)</u> | -0.652(0.522)          | 0.195(0.846)  |
| GMDS-DT     | -0.225(0.825) | -0.771(0.450) | 0.882(0.404)         | <u>3.98(2.324e-04)</u> | 0.486(0.632)  |
| LAMTOR5-AS1 | -0.148(0.883) | -0.097(0.923) | 0.131(0.898)         | 1.056(0.297)           | 1.291(0.204)  |
| NRSN2-AS1   | -0.613(0.552) | -0.811(0.430) | -1.848(0.071)        | 0.576(0.567)           | -1.5(0.157)   |
| ZBED5-AS1   | 0.868(0.390)  | 0.946(0.350)  | -0.739(0.463)        | 1.242(0.223)           | 0.338(0.737)  |
| ADPGK-A S1  | 1.503(0.140)  | 0.824(0.414)  | 1.018(0.342)         | 1.805(0.078)           | 1.411(0.166)  |
| riskScore   | 0.922(0.361)  | -0.85(0.408)  | -1.876(0.067)        | 1.801(0.080)           | -1.038(0.317) |
| risk        | -0.568(0.577) | 0.387(0.702)  | 1.575(0.145)         | -1.468(0.154)          | 0.698(0.492)  |

A value greater than 0 indicates a positive correlation between lncRNA or riskscore and clinical characteristics, a value less than 0 indicates a negative correlation between the two, and a p<0.05 indicates statistical significance. Statistically significant data are underlined.

**Supplement table 4 Associations between the expression levels of the differentially expressed macrophage-associated lncRNAs and the clinicopathological characteristics of the patients with hepatocellular carcinoma based on TCGA dataset**

| id          | BCLC                 | cirrhosis            | age           | gender                   | grade               | stage                    | T                        | M                        | N                      |
|-------------|----------------------|----------------------|---------------|--------------------------|---------------------|--------------------------|--------------------------|--------------------------|------------------------|
| LINC01160   | 0.558(0.906)         | 1.299(0.729)         | 53.332(0.347) | 0.121(0.904)             | 2.028(0.567)        | 7.681(0.053)             | 4.48(0.214)              | 6.143(0.002)             | -1.593(0.249)          |
| NRSN2-AS1   | 4.032(0.258)         | 2.55(0.466)          | 60.985(0.137) | 1.282(0.203)             | <u>8.356(0.039)</u> | <u>17.762(4.924e-04)</u> | <u>17.024(6.988e-04)</u> | 0.619(0.597)             | -0.888(0.467)          |
| GMDS-DT     | 0.714(0.870)         | 4.79(0.188)          | 47.305(0.582) | 1.75(0.083)              | 0.804(0.848)        | 8.199(0.042)             | 3.892(0.273)             | 2.319(0.137)             | -1.304(0.321)          |
| LAMTOR5-AS1 | 0.493(0.920)         | 1.41(0.703)          | 49.807(0.481) | -2.2(0.029)              | 4.438(0.218)        | 4.388(0.222)             | 3.247(0.355)             | <u>8.911(1.32e-04)</u>   | -1.516(0.235)          |
| SEMA6A-AS1  | 2.116(0.549)         | 5.379(0.146)         | 48.971(0.515) | <u>2.067(0.042)</u>      | 5.559(0.135)        | 7.843(0.049)             | 3.552(0.314)             | <u>6.491(0.005)</u>      | -0.937(0.448)          |
| ADPGK-A S1  | 4.014(0.260)         | 2.271(0.518)         | 54.685(0.301) | 0.074(0.941)             | 4.178(0.243)        | 7.145(0.067)             | 1.772(0.621)             | <u>10.051(9.249e-20)</u> | 1.129(0.342)           |
| ZBED5-AS1   | 2.689(0.442)         | 2.723(0.436)         | 43.052(0.746) | <u>-3.745(2.426e-04)</u> | 4.571(0.206)        | 2.588(0.460)             | 1.084(0.781)             | 1.531(0.260)             | 0.471(0.682)           |
| FOXP4-AS1   | <u>11.532(0.009)</u> | <u>12.024(0.007)</u> | 42.138(0.778) | 0.942(0.348)             | 6.853(0.077)        | 5.679(0.128)             | 6.358(0.095)             | 1.365(0.291)             | -0.665(0.574)          |
| riskScore   | <u>11.683(0.009)</u> | <u>9.336(0.025)</u>  | 57.369(0.221) | 0.604(0.547)             | <u>8.995(0.029)</u> | <u>16.928(7.312e-04)</u> | <u>16.322(9.74e-04)</u>  | 0.109(0.923)             | -1.162(0.363)          |
| risk        | <u>8.765(0.033)</u>  | 6.427(0.093)         | 65.022(0.075) | 0.352(0.726)             | 7.76(0.051)         | <u>12.543(0.006)</u>     | <u>10.089(0.018)</u>     | -0.58(0.620)             | <u>14.2(8.438e-33)</u> |

A value greater than 0 indicates a positive correlation between lncRNA or riskscore and clinical characteristics, a value less than 0 indicates a negative correlation between the two, and a p<0.05 indicates statistical significance. Statistically significant data are underlined.

Supplement File 2 The Top 10 Gene Ontology (GO) pathway.

| ONTO LOGY | ID         | Description                                                         | GeneRatio | BgRatio   | pvalue   | p.adjust | qvalue   | geneID                                                                                                                                                                                                                                                                                                                                                                                                                                                                                                                                                                                                                                                                                                                                                                                                                                                                                                                                                                                                                                                                                                                                                                                                                                                                                                                                                                                                                                                                                                                                                                                                                                                                                                                                                                                                                                                                             | Count |
|-----------|------------|---------------------------------------------------------------------|-----------|-----------|----------|----------|----------|------------------------------------------------------------------------------------------------------------------------------------------------------------------------------------------------------------------------------------------------------------------------------------------------------------------------------------------------------------------------------------------------------------------------------------------------------------------------------------------------------------------------------------------------------------------------------------------------------------------------------------------------------------------------------------------------------------------------------------------------------------------------------------------------------------------------------------------------------------------------------------------------------------------------------------------------------------------------------------------------------------------------------------------------------------------------------------------------------------------------------------------------------------------------------------------------------------------------------------------------------------------------------------------------------------------------------------------------------------------------------------------------------------------------------------------------------------------------------------------------------------------------------------------------------------------------------------------------------------------------------------------------------------------------------------------------------------------------------------------------------------------------------------------------------------------------------------------------------------------------------------|-------|
| BP        | GO:000184  | nuclear-transcribed mRNA catabolic process, nonsense-mediated decay | 103/5534  | 118/17913 | 2.43E-37 | 1.51E-33 | 1.28E-33 | RPS24/RPL18/RPS3/RPL14/RPS21/RPL7A/RPS19/RPL37/RPL27A/RPL8/RPL32/RPSA/RPL12/RPS16/RPL28/RPL35/RPS2/RPL37A/RPL6/RPS5/RPS7/RPL23A/RPL29/RPL24/RPS17/RPS8/RPL13A/RPL18A/RPS11/RPL7/RPL3/RPS9/RPL35A/RPL9/RPL31/RPL13/RPL2/RPL38/RPL36A/RPS18/RPL4/RPS6/RPLP0/RPL5/RPS10/RPL15/RPL27/RPS27A/RPL30/RPS20/RPL23/RPL11/RPS12/RPS3A/RPL36/RPL19/RPLP1/RPS13/RPS15/RPS15A/RPL10A/RPS28/RPS23/RPS14/RPS25/RPL17/PABPC1/EIF3E/DHX34/UBA52/RPL34/RPL41/RPS29/RPS27/RPL26/RPL21/RPL39/SMG9/RPS4X/PPP2R1A/RPL22/SMG1/RNPS1/NCBP2/EXOSC10/UPF3B/PNRC2/ETF1/PPP2CA/CASC3/PARN/EIF4A3/NCBP1/GSPT1/UPF3A/UPF2/SMG7/SMG8/SECISBP2/DCP1A/NBAS/UPF1/DCP2                                                                                                                                                                                                                                                                                                                                                                                                                                                                                                                                                                                                                                                                                                                                                                                                                                                                                                                                                                                                                                                                                                                                                                                                                                                | 103   |
| BP        | GO:0019083 | viral transcription                                                 | 136/5534  | 177/17913 | 1.53E-36 | 4.73E-33 | 4.03E-33 | RPS24/RPL18/RPS3/RPL14/RPS21/RPL7A/RPS19/RPL37/RPL27A/RPL8/RPL32/RPSA/RPL12/RPS16/RPL28/RPL35/RPS2/RPL37A/RPL6/RPS5/RPS7/RPL23A/RPL29/RPL24/RPS17/RPS8/RPL13A/RPL18A/POLR2H/RPS11/RPL7/RPL3/RPS9/RPL35A/RPL9/RPL31/RPL13/RPL2/RPL38/RPL36A/RPS18/RPL4/RPS6/RPLP0/RPL5/RPS10/RPL15/RPL27/RPS27A/RPL30/RPS20/RPL23/RPL11/RPS12/RPS3A/RPL36/RPL19/RPLP1/RPS13/RPS15/RPS15A/RPL10A/RPS28/RPS23/RPS14/RPS25/RPL17/POLR2J/TARBP2/UBA52/RPL34/RPL41/RPS29/POLR2I/RPS27/HMGA2/RPL26/RPL21/RPL39/RPS4X/TFAP4/SUPT5H/RAE1/SMARCB1/RPL22/TRIM62/NUP93/HPN/CCNT2/SP1/CCNT1/RSF1/CHD1/SUPT4H1/NDC1/NUP107/NUP155/NUP205/TRIM32/NUP188/SMARCA4/NUP37/NUP85/NUP43/NUP62/TARDBP/HDAC1/DHX9/POLR2B/NELFA/AAAS/GTF2F2/GTF2F1/ZNF639/POLR2G/POLR2D/NUP35/CTDP1/NUP214/SNW1/TAF11/NUP153/TRIM27/POM121C/TPR/NUP160/NELFE/POM121/NUP54/EP300/REST/NUP133/NUP58/NUCKS1/NUP98/TRIM13                                                                                                                                                                                                                                                                                                                                                                                                                                                                                                                                                                                                                                                                                                                                                                                                                                                                                                                                                                                                                      | 136   |
| BP        | GO:0006397 | mRNA processing                                                     | 288/5534  | 499/17913 | 3.34E-36 | 4.80E-33 | 4.09E-33 | SNU13/POLR2H/SNRPD2/GEMIN7/SNRPF/SNRPA/SNRPD1/HSF1/CLASRP/SNRPB/LSM8/PRPF31/THOC5/POLR2J/CPSF1/SRRT/PABPC1/SRSF12/LSM4/LSM7/SNRPA1/TXNL4A/LSM2/SNRPG/ISY1/CPSF4/TSEN34/SNRPD3/POLR2I/PRPF6/ERCC2/RALY/AKAP8L/TBRG4/ARL6IP4/PP1H/SNRNP70/SUPT5H/SNRPE/SNRPC/PDCD11/ALYREF/SF3A2/RBM42/SYMPK/CELF2/SREK1/RNPC3/SRSF11/TIA1/PRPF38B/TRA2A/ZRANB2/PAN3/PNN/DDX17/HNRNPH1/DDX47/RBM25/DDX39B/KHDC4/RBM39/SRRM2/RBM5/SF3B1/ACIN1/PRPF40B/SRSF10/CCNT1/RBBP6/MBNL1/PABPC1L/PTBP3/TENT2/PCF11/CPSF6/CPSF7/RBM26/ZNF326/SRSF6/PRPF40A/U2SURP/USP49/PPWD1/SRSF2/U2AF1/DDX5/ERCC3/SFPQ/YTHDC1/SFSWAP/CDK13/HNRNPH3/SUGP2/PRPF4B/ZCCHC8/TTF2/ZC3H11A/SCAF11/PTBP2/CELF1/CDK12/SART3/SRSF1/RBM4/CCAR1/DDX42/THOC2/AKAP17A/BCAS2/PRPF38A/RBM17/RNPS1/NCBP2/HNRNPL/USP39/KHDRBS1/CWC27/RBM28/BARD1/EFTUD2/RBMX/HNRNPLL/CPSF3/SNRNP27/U2AF2/SF3A3/SNRNP200/CD2BP2/DDX23/FIP1L1/CSTF2/SRPK2/HNRNPU/CCAR2/DHX15/DDX1/YBX1/BUD31/UPF3B/FUS/RSRC1/KDM1A/HNRNPA2B1/WDR77/1WS1/NSRP1/DDX39A/MTPAP/CCNB1/DHX8/DDX20/TSEN54/HNRNPD/GTF2H1/HNRNPR/NUDT21/PNPT1/TARDBP/HNRNPU/SF3B3/SLBP/SMNDC1/STRAP/HNRNPA3/HNRNPC/DHX9/CHTOP/ZRSR2/MFAP1/GRSF1/PPP1R8/CWC22/SNRPB2/ZPR1/POLR2B/SRSF3/BUD13/PRPF4/SRSF9/PP1E/DNAJC8/TRA2B/HNRNPA0/ELAVL1/SNRNP40/DHX35/RBM15B/JMJD6/HTATSF1/HNRNPK/DHX38/CASC3/SF3B2/LSM1/GTF2F2/DDX46/HNRNPM/PDCD7/SCAF1/SF3B6/RBM10/XRN2/RNMT/CIR1/EIF4A3/NBDY/NCBP1/SF3B4/CDK11B/GTF2F1/ECD/WTAP/GEMIN2/HNRNPA1/GEMIN8/PTBP1/NONO/ZNF473/POLR2G/CPSF2/MTREX/SYNCRIP/SF1/POLR2D/SRSF7/AQR/SARNP/THRAP3/GEMIN5/RBM22/HNRNPA1L2/DDX41/WDR33/PRPF3/CRNKL1/SUGP1/SNW1/NOVA1/CDK11A/TSEN2/IK/ESS2/AHCYL1/DHX16/CMTR1/GTF2H4/SNRNP48/CDC5L/SRPK1/ZNF830/METTL3/SUPT6H/FAM172A/RBFOX2/WBP11/RBM27/GPATCH1/CWC25/NELFE/CDC73/KHSRP/POLDIP3/SF3A1/DHX36/PAN2/PP1L3/PP1L1/SLU7/SON/REST/CACTIN/SRSF4/CSTF2T/DYRK1A/PHRF1/RNF20/CSTF3/LSM11/GTF2H3/HNRNPF/TGS1/RAMAC/NUP98/ZCRB1/RNF40/PAPOLA/SRRM1 | 288   |
| BP        | GO:0008380 | RNA splicing                                                        | 262/5534  | 440/17913 | 3.52E-36 | 4.80E-33 | 4.09E-33 | SNU13/POLR2H/SNRPD2/GEMIN7/SNRPF/SNRPA/SNRPD1/RPS13/CLASRP/SNRPB/LSM8/PRPF31/THOC5/POLR2J/CPSF1/SRRT/PABPC1/SRSF12/LSM4/LSM7/SNRPA1/TXNL4A/LSM2/SNRPG/ISY1/CPSF4/TSEN34/SNRPD3/POLR2I/PRPF6/RALY/PPP2R1A/AKAP8L/ARL6IP4/PP1H/SNRNP70/SNRPE/SNRPC/ALYREF/SF3A2/RBM42/SYMPK/CELF2/SREK1/RNPC3/SRSF11/TIA1/PRPF38B/TRA2A/ZRANB2/PNN/DDX17/LUC7L3/HNRNPH1/DDX47/RBM25/DDX39B/CLK4/KHDC4/RBM39/SRRM2/RBM5/ZNF638/SF3B1/CLK1/ACIN1/PRPF40B/C2orf49/SRSF10/CLK3/MBNL1/PTBP3/PCF11/CPSF7/ZNF326/SRSF6/PRPF40A/U2SURP/USP49/PPWD1/SRSF2/U2AF1/DDX5/SFPQ/YTHDC1/SFSWAP/CDK13/HNRNPH3/SUGP2/PRPF4B/ZCCHC8/TTF2/SCAF11/CLK2/PTBP2/CELF1/CDK12/SART3/SRSF1/RBM4/CCAR1/DDX42/THOC2/AKAP17A/BCAS2/PRPF38A/RBM17/RNPS1/NCBP2/HNRNPL/RRAGC/USP39/FAM98B/KHDRBS1/CWC27/RBM28/EFTUD2/RBMX/HNRNPLL/CPSF3/SNRNP27/U2AF2/DBR1/SF3A3/SNRNP200/CD2BP2/DDX23/FIP1L1/CSTF2/SRPK2/HNRNPU/CCAR2/DHX15/DDX1/YBX1/BUD31/UPF3B/FUS/RSRC1/KDM1A/HNRNPA2B1/WDR77/1WS1/NSRP1/DDX39A/USB1/DHX8/DDX20/TSEN54/HNRNPD/HNRNPR/NUDT21/TARDBP/HNRNPU/SF3B3/SMNDC1/STRAP/PPP1R9B/HNRNPA3/HNRNPC/DHX9/ZRSR2/MFAP1/RBM38/PPP1R8/CWC22/SNRPB2/ZPR1/POLR2B/SRSF3/BUD13/PRPF4/SRSF9/PP1E/DNAJC8/TRA2B/HNRNPA0/ELAVL1/SNRNP40/DHX35/RBM15B/JMJD6/PPP2CA/HTATSF1/HNRNPK/DHX38/CASC3/SF3B2/LSM1/GTF2F2/DDX46/HNRNPM/PDCD7/SCAF1/SF3B6/RBM10/CIR1/EIF4A3/NCBP1/SF3B4/GTF2F1/ECD/WTAP/GEMIN2/HNRNPA1/GEMIN8/PTBP1/NONO/POLR2G/CPSF2/MTREX/SYNCRIP/SF1/POLR2D/SRSF7/AQR/THRAP3/GEMIN5/RBM22/HNRNPA1L2/DDX41/WDR33/PRPF3/IVNS1ABP/CRNKL1/SUGP1/SNW1/NOVA1/TSEN2/IK/ESS2/DHX16/SNRNP48/CDC5L/SRPK1/ZNF830/METTL3/SUPT6H/FAM172A/RBFOX2/WBP11/GPATCH1/PP1G/CWC25/KHSRP/SF3A1/PP1L3/PP1L1/SLU7/SON/REST/CACTIN/SRSF4/CSTF2T/DYRK1A/CSTF3/HNRNPF/TGS1/NUP98/ZCRB1/PAPOLA/SRRM1                                                                                                                                                               | 262   |
| BP        | GO:0019080 | viral gene expression                                               | 143/5534  | 191/17913 | 4.00E-36 | 4.80E-33 | 4.09E-33 | RPS24/RPL18/RPS3/RPL14/RPS21/RPL7A/RPS19/RPL37/RPL27A/RPL8/RPL32/RPSA/RPL12/RPS16/RPL28/RPL35/RPS2/RPL37A/RPL6/RPS5/RPS7/RPL23A/RPL29/RPL24/RPS17/RPS8/RPL13A/RPL18A/RPS11/RPL7/RPL3/RPS9/RPL35A/RPL9/RPL31/RPL13/RPL2/RPL38/RPL36A/RPS18/RPL4/RPS6/RPLP0/RPL5/RPS10/RPL15/RPL27/RPS27A/RPL30/RPS20/RPL23/RPL11/RPS12/RPS3A/RPL36/RPL19/RPLP1/RPS13/RPS15/RPS15A/RPL10A/RPS28/RPS23/RPS14/RPS25/RPL17/POLR2J/EIF3D/TARBP2/UBA52/RPL34/RPL41/RPS29/POLR2I/RPS27/HMGA2/RPL26/RPL21/RPL39/RPS4X/TFAP4/SUPT5H/RAE1/EIF3F/SMARCB1/RPL22/TRIM62/NUP93/HPN/CCNT2/SP1/CCNT1/RSF1/CHD1/SUPT4H1/NDC1/NUP107/NUP155/NUP205/TRIM32/SSB/NUP188/SMARCA4/NUP37/NUP85/NUP43/NUP62/DENR/TARDBP/HDAC1/DHX9/POLR2B/NELFA/AAAS/GTF2F2/GTF2F1/ZNF639/PTBP1/POLR2G/POLR2D/NUP35/CTDP1/NUP214/SNW1/TAF11/NUP153/TRIM27/POM121C/TPR/NUP160/NELFE/POM121/NUP54/EP300/REST/NUP133/NUP58/NUCKS1/NUP98/TRIM13/EIF2D                                                                                                                                                                                                                                                                                                                                                                                                                                                                                                                                                                                                                                                                                                                                                                                                                                                                                                                                                                                            | 143   |
| BP        | GO:0006260 | DNA replication                                                     | 178/5534  | 260/17913 | 5.00E-36 | 4.80E-33 | 4.09E-33 | RECQL4/HCRT/TONSL/TWINK/DSCC1/PPP2R1A/HMGA1/POLL/ALYREF/ING5/NAP1L1/CDT1/NUGGC/NF1C/MCMDC2/CENPX/ZNF365/GLI1/FGF10/ETAA1/POLI/ORC2/FAM111A/ATM/RBBP6/REV1/ATR/DDX11/ESCO1/MRE11/FBXW7/DNA2/ORC4/INO80/HELBG/GEN1/RFD3/TBRG1/ATRX/BOD1L1/KCTD13/RECQL5/CENPS/RPA3/FAF1/POLG2/GTPBP4/FBH1/RBBP8/TTF1/POLA1/CLSPN/RAD51/MCM10/BARD1/GINS3/DBF4B/TOPBP1/CHEK1/ORC1/MCIDAS/ORC6/CDC7/RBBP4/CDK2/MCM8/RHNO1/DBF4/RAD1/RFC2/MCM6/PNKP/TIPIN/MCM3/GINS1/RBBP7/CHAF1B/CDC6/S100A11/RAC1/MGME1/RFC4/PRIM2/TICRR/POLD3/MCM4/EXO1/SMARCAL1/GINS4/SET/CDC45/ATG7/SSRP1/BRCA1/MMS22L/MCM2/NASP/RBM14/POLD1/ATAD5/SUPT16H/CDK1/CDK2AP1/PCLAF/NCOA6/SLBP/BLM/DHX9/FBXO5/RRM2/BRCA2/RTF2/ZPR1/RRM1/KAT7/ESCO2/EHMT2/RFC3/PPP2CA/MCM7/PCNA/CHTF18/RFC5/FEN1/RPA1/POLA2/RPA2/RMI2/DTL/ORC5/HUS1/CHAF1A/CCNA2/DTD1/SIN3A/GMNN/WRN/WIZ/RNASEH2A/CACYBP/POLE3/E2F8/SETMAR/CCDC88A/WRNIP1/POLH/LIG3/RAD17/ZNF830/SMC3/PRIMPOL/RAD50/WAPL/CDAN1/RFC1/POLK/RAD9A/FANCM/KAT5/SMC1A/ATF1/USP37/PDS5A/REPINI/TIMELESS/ZRANB3/NUCKS1/RMI1/SLX4/STAG2/POLG/UPF1/NUP98/PURA/BRIP1/E4F1/ZMPSTE24/MCM9                                                                                                                                                                                                                                                                                                                                                                                                                                                                                                                                                                                                                                                                                                                                                                                                              | 178   |
| BP        | GO:0000956 | nuclear-transcribed mRNA catabolic process                          | 146/5534  | 197/17913 | 5.42E-36 | 4.80E-33 | 4.09E-33 | RPS24/RPL18/RPS3/RPL14/RPS21/RPL7A/RPS19/RPL37/RPL27A/RPL8/RPL32/RPSA/RPL12/RPS16/RPL28/RPL35/RPS2/RPL37A/RPL6/RPS5/RPS7/RPL23A/RPL29/RPL24/RPS17/RPS8/RPL13A/RPL18A/RPS11/RPL7/RPL3/RPS9/RPL35A/RPL9/RPL31/RPL13/RPL2/RPL38/RPL36A/RPS18/RPL4/RPS6/RPLP0/RPL5/RPS10/RPL15/RPL27/RPS27A/RPL30/RPS20/RPL23/RPL11/RPS12/RPS3A/RPL36/RPL19/RPLP1/RPS13/RPS15/RPS15A/RPL10A/EXOSC4/RPS28/RPS23/RPS14/RPS25/EXOSC5/EXOSC7/RPL17/CNOT11/PABPC1/LSM4/LSM7/EIF3E/DHX34/UBA52/RPL34/RPL41/LSM2/EXOSC1/RPS29/RPS27/RPL26/RPL21/RPL39/SMG9/RPS4X/PPP2R1A/EXOSC2/RPL22/PAN3/CNOT6/CNOT2/ATM/SMG1/TENT2/DDX5/TUT4/TNRC6B/CSDE1/RNPS1/NCBP2/CNOT3/SSB/EXOSC10/UPF3B/MTPAP/CNOT9/EDC3/PNRC2/CNOT10/ETF1/PPP2CA/EXOSC3/CASC3/LSM1/CNOT8/PARN/EIF4A3/NBDY/NCBP1/AGO1/GSPT1/MLH1/THRAP3/SKIV2L/UPF3A/DDX6/DIS3L2/UPF2/SMG7/SMG8/SECISBP2/CNOT4/DHX36/PAN2/DCP1A/NBAS/EDC4/UPF1/DXO/EXOSC8/TTC37/CNOT1/DCP2/RC3H1/RPS3/SAPCD2/SPIRE2/AURKB/RANGRF/FKBP4/LZTS2/BCCIP/ARL2/DRG1/MYBL2/PPP2R1A/KAT2A/RAE1/ARHGFE2/GADD45A/KAT2B/HAUS4/CETN2/PLA2G3/MAP1A/FGF10/TRIM36/SLC39A12/IQCG/NEFL/TTL3/CFAP44/WDR73/PPP1R12A/SPICE1/CEP135/GCC2/TBK2/EFHC1/TAOK1/KIF3A/ZNF207/CCDC39/USP33/MARK2/C2CD3/PKD1/RNF19A/IFT172/CEP192/MTCL1/CFAP73/CEP295/CHMP3/ARHGFE10/CCDC78/DNAL1/MAP9/SS18/GAS2L3/SUN1/INO80/HAUS3/GEN1/HDGFL3/PKHD1/CLASP1/DNAAF4/ATRX/HOOK3/TUBG2/XPO1/TUBGCP6/ATXN7/MECP2/KIF2A/BICD1/KIAA0753/CCDC66/PHLDB1/CAMSA2/CEP97/CROCC/SSX21P/BBS4/MAPRE1/CEP19/GPSM2/RAB11A/KPNB1/NDE1/MAP4/KIF23/STIL/CHMP4B/CC2D2A/TTC26/KIF2C/DYNC1H1/CHEK1/SPDL1/MCIDAS/PLK1/KIF11/CDK2/INPP5J/TACC3/RAN/KIF20A/DCTN1/RNF4/PRC1/MAP1S/KIF18B/RACGAP1/JHY/STMN1/CSNK1D/KATN                                                                                                                                                                                                                                       | 146   |
| BP        | GO:0000226 | microtubule cytoskeleton organization                               | 264/5534  | 460/17913 | 1.08E-32 | 8.39E-30 | 7.15E-30 | RPS24/RPL18/RPS3/RPL14/RPS21/RPL7A/RPS19/RPL37/RPL27A/RPL8/RPL32/RPSA/RPL12/RPS16/RPL28/RPL35/RPS2/RPL37A/RPL6/RPS5/RPS7/RPL23A/RPL29/RPL24/RPS17/RPS8/RPL13A/RPL18A/RPS11/RPL7/RPL3/RPS9/RPL35A/RPL9/RPL31/RPL13/RPL2/RPL38/RPL36A/RPS18/RPL4/RPS6/RPLP0/RPL5/RPS10/RPL15/RPL27/RPS27A/RPL30/RPS20/RPL23/RPL11/RPS12/RPS3A/RPL36/RPL19/RPLP1/RPS13/RPS15/RPS15A/RPL10A/RPS28/RPS23/RPS14/RPS25/RPL17/POLR2J/EIF3D/TARBP2/UBA52/RPL34/RPL41/RPS29/POLR2I/RPS27/HMGA2/RPL26/RPL21/RPL39/RPS4X/TFAP4/SUPT5H/RAE1/EIF3F/SMARCB1/RPL22/TRIM62/NUP93/HPN/CCNT2/SP1/CCNT1/RSF1/CHD1/SUPT4H1/NDC1/NUP107/NUP155/NUP205/TRIM32/SSB/NUP188/SMARCA4/NUP37/NUP85/NUP43/NUP62/DENR/TARDBP/HDAC1/DHX9/POLR2B/NELFA/AAAS/GTF2F2/GTF2F1/ZNF639/PTBP1/POLR2G/POLR2D/NUP35/CTDP1/NUP214/SNW1/TAF11/NUP153/TRIM27/POM121C/TPR/NUP160/NELFE/POM121/NUP54/EP300/REST/NUP133/NUP58/NUCKS1/NUP98/TRIM13/EIF2D                                                                                                                                                                                                                                                                                                                                                                                                                                                                                                                                                                                                                                                                                                                                                                                                                                                                                                                                                                                            | 264   |



|    |                |                                                       |          |               |              |              |                                                                                                                                                                                                                                                                                                |  |  |         |
|----|----------------|-------------------------------------------------------|----------|---------------|--------------|--------------|------------------------------------------------------------------------------------------------------------------------------------------------------------------------------------------------------------------------------------------------------------------------------------------------|--|--|---------|
|    |                |                                                       |          |               |              |              | AL2/CEP126/KIF4A/EML2/CENPA/XRCC2/DNAF5/MAD2L1/PLK4/CENPE/RAC1/CEP152/WDR62/HNRNPU/NCKAP5L/HAUS6/BICD2/HAUS2/SPC25/KIF18A/ATAT1/CDC20/SKA1/MDM1/NDC80/BRCA1/HAUS1/CENPJ/AUNIP/NUP62/INTS13/RBM14/EZR/WRAP73/E2F4/TTK/ABL1/RCC1/NUSAP1/CCNB1/KIFC1/CDK1/CFAP157/SASS6/PCLAF/TUBG1/TTL1/TRIM37/S |  |  |         |
|    |                |                                                       |          |               |              |              | G01/TTL/CCNF/RHOA/GSK3B/CCDC40/KIF24/FBX05/HAUS8/TPX2/FLNA/GAPDH/BRCA2/SDCCAG8/EFNA5/CKAP5/CDK5R1/CHD3/CEP131/ZPR1/CLTC/CHORDC1/NEK2/CEP250/CAMS                                                                                                                                               |  |  |         |
|    |                |                                                       |          |               |              |              | AP1/CEP68/KNSTRN/TMEM67/ODF2/AAAS/PCNT/SPEF1/SKA3/MARK1/CLIP3/FIGNL1/KATNA1/PAK1/PSRC1/SP1RE1/HAUS5/GBA2/MCPH1/DNAH7/CEP63/SPAG1/BORA/CKAP2/MLH1                                                                                                                                               |  |  |         |
|    |                |                                                       |          |               |              |              | /BRSK1/DYNLT1/AURKA/CHMP1A/NIN/DOCK7/CNTROB/SRGAP2/CRMP1/FER/TRAF3IP1/LRRC6/NPM1/CUL7/CUL9/RANBP9/NUMA1/GOLGA2/PIBF1/SMC3/DLG1/TPR/SETD2/CETN3/                                                                                                                                                |  |  |         |
|    |                |                                                       |          |               |              |              | CLASP2/STAG1/CEP350/SMC1A/SPAST/CCP110/PRUNE1/PDCD61P/SLK/TUBGCP4/SON/TOGARAM1/TUBGCP5/DYRK1A/STAG2/TUBB/ZW10/CEP70/ABRAXAS2/VAMP4/NEK7/GNAI1/CN                                                                                                                                               |  |  |         |
|    |                |                                                       |          |               |              |              | P/CEP85/FOPNL/CDK5RAP2/TUBGCP3/GAS8/UVRAG                                                                                                                                                                                                                                                      |  |  |         |
|    |                |                                                       |          |               |              |              | FBL/TRIM28/PRMT1/BEND3/PIH1D1/HDAC10/RUVBL2/AURKB/SUPT3H/HMGA2/DNMT3A/AKAP8L/KAT2A/HDAC11/SMARCB1/ING5/KMT5C/SETD7/KAT2B/PINK1/SIRT3/PRMT8/PAX7/                                                                                                                                               |  |  |         |
|    |                |                                                       |          |               |              |              | HDAC9/JAK2/TWIST1/SPI1/DPF1/EYA1/GATA3/MYSM1/OGT/BAZ2A/KANSL1L/PCGF3/MLLT6/NA40/TET3/PAXBP1/KMT2A/ATM/MTF2/KMT2D/EP400/KANSL1/TET2/SRCAP/HDAC7/                                                                                                                                                |  |  |         |
|    |                |                                                       |          |               |              |              | SETD5/BRD8/RIF1/SUPT7L/EZH1/PRDM4/PRDM2/YEATS2/USP3/KMT2E/USP49/NIPBL/SFPQ/KDM5C/PPHLN1/SUDS3/NSD1/DR1/MAP3K12/SETD1B/KDM3A/MSL2/KANSL3/MUC1/ASX                                                                                                                                               |  |  |         |
|    |                |                                                       |          |               |              |              | L1/EPC1/AKAP8/MIER1/TADA2A/ATRX/UIMC1/SART3/SMARCA1/EPC2/MSL1/NSD2/TAF1/RSF1/CTCF/ZNF335/ATXN7/SDR16C5/ARID4B/CHD1/MECP2/NSD3/KDM2A/DMP1/H2AFY                                                                                                                                                 |  |  |         |
|    |                |                                                       |          |               |              |              | /PRMT2/RUVBL1/PPP5C/NEK11/PHF19/CHEK1/CDK2/EED/KANSL2/PHC1/PHF20/MCRS1/HCF1/BRPF1/ACTL6A/HDAC2/EZH2/MORF4L1/MAPK3/UBE2N/SET/KDM1A/WAC/DNMT1/NA                                                                                                                                                 |  |  |         |
|    |                |                                                       |          |               |              |              | 50/BRCA1/HAT1/DPF2/IWS1/MSL3/RBM14/JADE2/HUWE1/RPS6KA4/UBE2E1/MBD2/CCNB1/CDK1/TRRAP/KMT5A/TRIM37/PWP1/PCGF2/HDAC1/HASPIN/TRIP12/CHTOP/CUL4B/UHRF                                                                                                                                               |  |  |         |
|    |                |                                                       |          |               |              |              | 1/PRKCD/BRCA2/BAZ1B/MECOM/SUV39H2/SETD1A/ATXN7L3/LDB1/MAP3K7/KAT7/EHMT2/GTF3C4/PKN1/JMJD6/UBE2A/CXCC1/ATF7IP/USP22/WDR82/RNF2/USP21/VRK1/KDM4A/C                                                                                                                                               |  |  |         |
|    |                |                                                       |          |               |              |              | TBP1/HELLS/USP36/SIRT6/OTUB1/SUZ12/CCNA2/PRKD2/SIN3A/RLF/UBR5/DBB1/AURKA/PYGO2/APBB1/EYA3/ATF2/PHB/RTF1/SNW1/SAP30/POLE3/SETMAR/BRCC3/ZNF451/KDM                                                                                                                                               |  |  |         |
|    |                |                                                       |          |               |              |              | 1B/C6orf89/JARID2/PHF1/BRPF3/PAXIP1/SETDB1/VEGFA/UBR2/ING3/MORC2/ASH1L/DCAF1/RING1/SETD2/BCOR/SUPT6H/KAT8/PHF2/PRKCA/SETD6/CREBBP/NELFE/CDC73/BR                                                                                                                                               |  |  |         |
|    |                |                                                       |          |               |              |              | D1/MCM3AP/KAT5/ZNF304/ZNF274/KAT14/EP300/YEATS4/CBX8/REST/BMI1/RCOR1/SMAD4/ELK4/EHMT1/KMT5B/RNF8/KMT2C/RNF20/MPHOSPH8/CRTC2/SIRT7/KDM5A/RBBP5/TA                                                                                                                                               |  |  |         |
|    |                |                                                       |          |               |              |              | F5/CARM1/NCOA3/RNF40/USP7/KDM5B/CLOCK/DOT1L/ZMPSTE24                                                                                                                                                                                                                                           |  |  |         |
|    |                |                                                       |          |               |              |              | SNU13/POLR2H/SNRPD2/GEMIN7/SNRPF/SNRPA/SNRPD1/SNRPB/LSM8/PRPF31/POLR2J/CPSF1/SRR1/PABPC1/SRSF12/LSM4/LSM7/SNRPA1/TXNL4A/LSM2/SNRPG/ISY1/CPSF4/SN                                                                                                                                               |  |  |         |
|    |                |                                                       |          |               |              |              | RPD3/POLR2I/PRPF6/RALY/PIH/SNRNP70/SNRPE/SNRPC/ALYREF/SF3A2/RBM42/SYMPK/CELP2/SREK1/RNPC3/SRSF11/TIA1/TRA2A/PNN/DDX17/HNRNPH1/RBM25/DDX39B/KHDC                                                                                                                                                |  |  |         |
|    |                |                                                       |          |               |              |              | 4/SRRM2/RBM5/SF3B1/PRPF40B/SRSF10/PCF11/CPSF7/SRSF6/PRPF40A/U2SURP/USP49/PPWD1/SRSF2/U2AF1/DDX5/SFPQ/YTHDC1/SFSWAP/CDK13/HNRNPH3/PRPF4B/ZCCHC8/S                                                                                                                                               |  |  |         |
|    |                |                                                       |          |               |              |              | CAF11/PTBP2/CELF1/SART3/SRSF1/RBM4/CCAR1/DDX42/BCAS2/PRPF38A/RBM17/RNPS1/NCBP2/HNRNPL/USP39/KHDRBS1/CWC27/EFTUD2/RBMX/CPSF3/SNRNP27/U2AF2/DBR1/S                                                                                                                                               |  |  |         |
|    |                |                                                       |          |               |              |              | F3A3/SNRNP200/CD2BP2/DDX23/FIP1L1/CSTF2/SRPK2/HNRNPU/DHX15/DDX1/YBX1/BUD31/UPF3B/FUS/RSRC1/KDM1A/HNRNPA2B1/WDR77/NSRP1/DDX39A/DHX8/DDX20/HNRNPD/                                                                                                                                               |  |  |         |
|    |                |                                                       |          |               |              |              | HNRNPR/NUDT21/HNRNPU1/SF3B3/SMNDC1/STRAP/HNRNPA3/HNRNPC/DHX9/ZRSR2/MFAP1/CWC22/SNRPB2/POLR2B/SRSF3/BUD13/PRPF4/SRSF9/PIIE/DNAJC8/TRA2B/HNRNPA0/                                                                                                                                                |  |  |         |
|    |                |                                                       |          |               |              |              | ELAVL1/SNRNP40/DHX35/RBM15B/JMJD6/HTATSF1/HNRNPK/DHX38/CASC3/SF3B2/LSM1/GTF2F2/DDX46/HNRNPM/PDCD7/SF3B6/RBM10/EIF4A3/NCBP1/SF3B4/GTF2F1/WTAP/GEM                                                                                                                                               |  |  |         |
|    |                |                                                       |          |               |              |              | IN2/HNRNPA1/GEMIN8/PTBP1/POLR2G/CPSF2/MTREX/SYNCRIP/SF1/POLR2D/SRSF7/AQR/THRAP3/GEMIN5/RBM22/DDX41/WDR33/PRPF3/CRNKL1/SUGP1/SNW1/NOVA1/IK/ESS2/D                                                                                                                                               |  |  |         |
|    |                |                                                       |          |               |              |              | HX16/SNRNP48/CDC5L/SRPK1/METTL3/FAM172A/RBFOX2/WBP11/GPATC1/CWC25/KHSRP/SF3A1/PPIL3/PPIL1/SLU7/SON/REST/CACTIN/SRSF4/CSTF2/DYRK1A/CSTF3/HNRNPF                                                                                                                                                 |  |  |         |
|    |                |                                                       |          |               |              |              | /TGS1/NUP98/ZCRB1/PAPOLA/SRRM1                                                                                                                                                                                                                                                                 |  |  |         |
|    |                |                                                       |          |               |              |              | RPS7/HSF1/MZT2A/SF11/NME1/MZT2B/RUVBL2/H2AFX/LZTS2/SSNA1/ATF4/BCCIP/RABL6/DYLNLR1/ARL2/DCAF13/KAT2A/KAT2B/HAUS4/LRRC45/CETN2/ODF2L/LCK/AKNA/NLRC                                                                                                                                               |  |  |         |
|    |                |                                                       |          |               |              |              | 5/CEP44/CCDC14/RIC8B/PPP1R12A/OFD1/CEP95/CEP290/ORC2/CEP170/BBS1/SPICE1/CEP135/EFHC1/IFT140/ZNF12/CNTRL/KIF3A/RBBP6/CEP164/WDR60/USP33/C2CD3/AHI                                                                                                                                               |  |  |         |
|    |                |                                                       |          |               |              |              | 1/NEDD1/POC5/RNF19A/MAK/ITSN2/TRAF5/DDX11/CEP192/DYNC1L12/CEP295/ARHGEF10/RAD51D/SCLT1/PATJ/HOOK2/PKN2/CAPRIN2/HAUS3/GEN1/PKHD1/CLASP1/SPPL2B/RA                                                                                                                                               |  |  |         |
|    |                |                                                       |          |               |              |              | BL2B/IQCB1/HOOK3/RPGRIP1L/FBXW11/TUBG2/TUBGCP6/MECP2/KIF2A/CEP162/BICD1/KIAA0753/CCDC66/CAMSAP2/CEP97/CROCC/MKS1/BCAS2/SSX2IP/BBS4/DCTN2/MAPRE1/                                                                                                                                               |  |  |         |
|    |                |                                                       |          |               |              |              | DCTN5/CEP19/MASTL/CEP89/IFT52/CEP55/GPSM2/RAB11A/NDE1/RABEP2/KIF23/STIL/GNAI3/CALM2/BBS7/TTC26/CHD4/CCT5/DYNC1L11/DCLRE1B/CEP112/RILPL1/IFT22/DY                                                                                                                                               |  |  |         |
|    |                |                                                       |          |               |              |              | NC1H1/CHEK1/DYNC1I2/CDC25B/CEP41/PLK1/DYNC2L11/CDK2/OLA1/DCTN1/TTL5/CSNK1D/CEP126/XRCC2/PRICKLE3/RAD18/IST1/MCM3/PLK4/CEP152/WDR62/HNRNPU/NCKAP                                                                                                                                                |  |  |         |
|    |                |                                                       |          |               |              |              | 5L/ADGRB2/HAUS6/DLGA5/BICD2/CKAP2L/HAUS2/CCT8/CDC45/CDC20/MDM1/CENPF/NDC80/SLF1/DPF2/MARCKS/HAUS1/CENPJ/AUNIP/NUP62/TXNDC9/MKKS/WRAP73/TBC1D31/                                                                                                                                                |  |  |         |
|    |                |                                                       |          |               |              |              | CCNB2/TRIP4/CCNB1/CDK1/SASS6/PCLAF/WDR35/NUDT21/TUBG1/CDC42/SGO1/CCT4/KIF15/CCNF/GSK3B/HASPIN/DHX9/ACTR8/HAUS8/KIF20B/BRCA2/SDCCAG8/CKAP5/HMMR/C                                                                                                                                               |  |  |         |
|    |                |                                                       |          |               |              |              | HD3/CEP131/FBF1/TCTEX1D2/NEK2/CEP250/CEP68/TMEM67/RAP1GAP2/ODF2/PCNA/AAAS/C7orf31/UNC119/PCNT/DNM2/ALMS1/EEF1AKMT3/NPH4/RAB23/ACTR1A/DTL/KATNA1                                                                                                                                                |  |  |         |
|    |                |                                                       |          |               |              |              | /FLOT1/B9D2/CDC27/HAUS5/ANKRD26/ATP6V1D/BOD1/CIR1/CCDC77/CEP63/C4orf47/CTSC/FAM161A/CKAP2/BRSK1/NME7/MZT1/CTDP1/WRN/AURKA/POC1B/NIN/TCP1/EYA3/CN                                                                                                                                               |  |  |         |
|    |                |                                                       |          |               |              |              | TROB/E2F1/CRMP1/RABGAP1/CCDC81/DYNLL1/TSEN2/NPM1/BICDL1/ALDOB/ZNF322/CUL7/KIF13A/PHF1/NUMA1/EXOC7/PIBF1/NEK9/PLEKHA7/CETN3/MI1B/CEP350/CSPP1/PPP                                                                                                                                               |  |  |         |
|    |                |                                                       |          |               |              |              | 4R3B/SPAST/DCAF12/CCP110/TUBGCP4/ZFYVE26/TUBGCP5/DCTN4/SMAD4/APEX1/CEP70/ACTR1B/ABRAXAS2/TBCD1/ERCC6L2/CDKL5/GNAI1/TNKS2/CCDC15/CEP85/KIAA0586/                                                                                                                                                |  |  |         |
|    |                |                                                       |          |               |              |              | TCHP/FOPNL/CDK5RAP2/TUBGCP3/UVRAG/BBS9                                                                                                                                                                                                                                                         |  |  |         |
|    |                |                                                       |          |               |              |              | SNU13/SNRPD2/SNRPF/SNRPA/SNRPD1/SNRPB/LSM8/PRPF31/PABPC1/LSM4/LSM7/SNRPA1/TXNL4A/LSM2/SNRPG/ISY1/SNRPD3/PRPF6/RALY/PIH/SNRNP70/SNRPE/SNRPC/ALYR                                                                                                                                                |  |  |         |
|    |                |                                                       |          |               |              |              | EF/SF3A2/SREK1/RNPC3/PNN/HNRNPH1/DDX39B/KHDC4/SRRM2/RBM5/SF3B1/PPWD1/SRSF2/U2AF1/DDX5/HNRNPH3/PRPF4B/ZCCHC8/TF2/PTBP2/SRSF1/AKAP17A/BCAS2/PRPF3                                                                                                                                                |  |  |         |
|    |                |                                                       |          |               |              |              | 8A/RBM17/USP39/CWC27/RBM28/EFTUD2/RBMX/U2AF2/SF3A3/SNRNP200/DDX23/HNRNPU/DHX15/YBX1/BUD31/HNRNPA2B1/WAC/DHX8/HNRNPR/SF3B3/SMNDC1/HNRNPA3/HNRNPF/                                                                                                                                               |  |  |         |
|    |                |                                                       |          |               |              |              | ZRSR2/MFAP1/PPP1R8/CWC22/SNRPB2/BUD13/PRPF4/PIIE/TRA2B/SNRNP40/DHX35/HNRNPK/DHX38/CASC3/SF3B2/HNRNPM/RHEB/PDCD7/SF3B6/EIF4A3/SF3B4/GEMIN2/HNRNPA                                                                                                                                               |  |  |         |
|    |                |                                                       |          |               |              |              | 1/MTREX/SYNCRIP/SF1/AQR/RBM22/HNRNPA1L2/DDX41/PRPF3/IVNS1ABP/CRNKL1/SUGP1/SNW1/IK/ESS2/DHX16/SNRNP48/CDC5L/ZNF830/GPATC1/CWC25/SF3A1/PPIL3/PPIL                                                                                                                                                |  |  |         |
|    |                |                                                       |          |               |              |              | 1/SLU7/CACTIN/UPF1/HNRNPF/ZCRB1/SRRM1                                                                                                                                                                                                                                                          |  |  |         |
|    |                |                                                       |          |               |              |              | RECQL4/HSF1/WRAP53/THOC5/H2AFX/AURKB/DSCC1/PPP2R1A/CENPM/DNMT3A/RANGAP1/ALYREF/KMT5C/H2AFY2/CDT1/KAT2B/CENPX/IKZF1/RASSF2/PML/TEP1/PPP1R12A/ORC2                                                                                                                                               |  |  |         |
|    |                |                                                       |          |               |              |              | /ZNF276/ATM/HIST4H4/SCMH1/KANSL1/MBD6/ZNF207/RIF1/MBD5/EZH1/ATR/DYNC1L12/SMCHD1/TP53BP1/RAD51D/MRE11/DNA2/ORC4/PKHD1/CLASP1/ATRX/CTCF/XPO1/THOC2                                                                                                                                               |  |  |         |
|    |                |                                                       |          |               |              |              | /CENPS/ITGB3BP/DCTN2/DCTN5/H2AFY/CBX3/RCC2/NDE1/PPP1CB/BUB1B/BUB1/RAD51/DYNC1L11/DCLRE1B/KIF2C/SGO2/CBX1/CHEK1/ORC1/ERCC6L/SPDL1/ZWILCH/PLK1/CDK                                                                                                                                               |  |  |         |
|    |                |                                                       |          |               |              |              | 2/CENPI/NUP107/DCTN1/CDC48/CBX5/CENPH/CENPL/CENPA/CENPK/MSH2/MCM6/NCAPG/MCM3/MAD2L1/CENPE/SSB/EZH2/HNRNPU/MCM4/SPC25/KIF18A/KDM1A/HNRNPA2B1/XRCC                                                                                                                                               |  |  |         |
|    |                |                                                       |          |               |              |              | 1/DNMT1/SKA1/INCENP/CENPF/NDC80/HAT1/MCM2/NUP37/NUP85/NUP43/KNTC1/HJURP/POLD1/TTK/NABP2/CCNB1/CDK1/NUF2/PHF6/BLM/MTBP/SGO1/CENPB/ZWINT/CDCA5/PPP                                                                                                                                               |  |  |         |
|    |                |                                                       |          |               |              |              | 1CC/NCAPD3/BRCA2/BAZ1B/DSN1/XRCC5/CKAP5/SUV39H2/OIP5/CENPW/POLR2B/CENPN/CENPQ/ESCO2/NEK2/NAT10/KNSTRN/PIF1/BIRC5/PPP2CA/MCM7/PCNA/ACD/FEN1/RPA1/                                                                                                                                               |  |  |         |
|    |                |                                                       |          |               |              |              | PRKDC/RPA2/SKA3/WDR82/NABP1/BUB3/ORC5/BOD1/CENPT/RAD21/HELLS/HIST1H4H/SIRT6/SIN3A/DBB1/WRN/CENPU/DYNLL1/GAR1/WRNIP1/DAXX/RAD17/SMC3/TPR/TOX4/SMC                                                                                                                                               |  |  |         |
|    |                |                                                       |          |               |              |              | 6/RAD50/KAT8/POT1/WAPL/PDS5B/PHF2/NUP160/CLASP2/STAG1/CDC73/SMC1A/TINF2/CENPC/LRIF1/DHX36/H3F3B/PDS5A/NUP133/DCTN4/SLX4/KMT5B/APEX1/STAG2/RNF8/U                                                                                                                                               |  |  |         |
|    |                |                                                       |          |               |              |              | PF1/PPP1R10/ZW10/NGDN/AHCTF1/TNKS2/MIS12/NUP98/PURA/AURKB/UVRAG/DOT1L                                                                                                                                                                                                                          |  |  |         |
|    |                |                                                       |          |               |              |              | IPO4/TRIM28/TONSL/BEND3/RUVBL2/THOC5/P3H4/CHRAC1/CHRAC2/CPSP9/KAT2A/ALYREF/TPPT/SMARCB1/KMT5C/H2AFY2/AR/RUNX2/RUNX3/SPI1/EOMES/IKZF1/DPF1/                                                                                                                                                     |  |  |         |
|    |                |                                                       |          |               |              |              | PML/GATA3/ZEB2/ACTB/ZNF385A/ETAA1/ORC2/SP1/ATM/HIST4H4/PURB/ZMIZ2/PHF12/EP400/CREB1/BRD8/RIF1/CPSF6/ATR/PAWR/DDX11/SINHCAF/POG2/BPTF/USP3/TCF12/                                                                                                                                               |  |  |         |
|    |                |                                                       |          |               |              |              | SMCHD1/TP53BP1/SS18/RAD51D/MRE11/SUDS3/DNA2/ORC4/INO80/HELB/MUC1/HMGXB4/ATRX/DFFB/SMARCA1/TAF1/RSF1/TAF4/THOC2/BCAS2/RPA3/SMARCD1/H2AFY/UBE2I/S                                                                                                                                                |  |  |         |
|    |                |                                                       |          |               |              |              | MAD2/CBX3/MTA3/PPP1CB/MTA2/POLA1/BUB1/CHD4/RUVBL1/RAD51/CSNK2A1/DCLRE1B/SMARCD3/RBMX/CBX1/ORC1/H2AFZ/PLK1/RBBP4/DVL3/EED/CBX5/MCRS1/CENPA/ACTL6A                                                                                                                                               |  |  |         |
|    |                |                                                       |          |               |              |              | /MSH2/MCM6/HDAC2/TIPIN/MCM3/RBBP7/CHAF1B/SSB/EZH2/CCAR2/POLR3D/ASF1B/TCF3/MORF4L1/POLD3/MCM4/BUD31/SFR1/SMARCAL1/EME1/KDM1A/SMARCA4/XRCC1/INCENP                                                                                                                                               |  |  |         |
|    |                |                                                       |          |               |              |              | /NDC80/BRCA1/HAT1/MMS22L/MCM2/DPF2/RAD51AP1/NASP/POLD1/RARG/E2F4/GATAD2A/MBD2/RCC1/NABP2/CCNB1/CDK1/BRD9/TRRAP/TARDBP/BLM/SGO1/CENPB/PCGF2/DFFA/                                                                                                                                               |  |  |         |
|    |                |                                                       |          |               |              |              | HDAC1/CDCA5/HNRNPC/DHX9/PPP1CC/ACTR8/NCAPD3/NCOR2/UHRF1/BRCA2/BAZ1B/XRCC5/CHD3/SETD1A/MSH6/POLR2B/LDB1/ESCO2/NAT10/EHMT2/PIF1/HMG2/MCM7/PCNA/AC                                                                                                                                                |  |  |         |
|    |                |                                                       |          |               |              |              | D/HNRNPK/FEN1/SMARCA5/RPA1/PRKDC/SMARCE1/RPA2/CREB3L1/WDR82/RNF2/NABP1/ORC5/CHAF1A/HIST1H4H/SIRT6/SUZ12/MLH1/SIN3A/TBP/DBB1/TCP1/RFX3/SMARCC2/E2                                                                                                                                               |  |  |         |
|    |                |                                                       |          |               |              |              | F1/FER/HIF1A/POLE3/GAR1/SMARCC1/WRNIP1/BICRAL/CDC5L/MLH3/NFRKB/ING3/SMC3/TTC21B/GATAD2B/RING1/SMAD3/TOX4/RAD50/ARID1A/UHRF2/POT1/WAPL/YY1/INO80E                                                                                                                                               |  |  |         |
|    |                |                                                       |          |               |              |              | /ANP32E/CREBBP/CDC73/KAT5/TINF2/CALCOCO1/CENPC/HIST1H3E/LRIF1/H3F3B/REPIN1/TIMELESS/YEATS4/ZRANB3/CBX8/MTA1/TBX6/SMAD4/YY1AP1/NUCKS1/SLX4/KMT5B/                                                                                                                                               |  |  |         |
|    |                |                                                       |          |               |              |              | APEX1/UPF1/PPP1R10/PLCB1/MPHOSPH8/PPARD/ETV3/TNKS2/SIRT7/TAF5/NCOA3/GABPA/PURA/SRF                                                                                                                                                                                                             |  |  |         |
| BP | G0:00<br>16569 | covalent chromatin<br>modification                    | 251/5534 | 433/179<br>13 | 4.51<br>E-32 | 3.10<br>E-29 | 2.64<br>E-29                                                                                                                                                                                                                                                                                   |  |  | 25<br>1 |
| BP | G0:00<br>00375 | RNA splicing, via<br>transesterification<br>reactions | 211/5534 | 348/179<br>13 | 7.23<br>E-31 | 4.48<br>E-28 | 3.82<br>E-28                                                                                                                                                                                                                                                                                   |  |  | 21<br>1 |
| CC | G0:00<br>05813 | centrosome                                            | 282/5692 | 473/186<br>78 | 3.41<br>E-40 | 2.43<br>E-37 | 1.67<br>E-37                                                                                                                                                                                                                                                                                   |  |  | 28<br>2 |
| CC | G0:00<br>05681 | spliceosomal complex                                  | 121/5692 | 160/186<br>78 | 4.30<br>E-32 | 1.53<br>E-29 | 1.05<br>E-29                                                                                                                                                                                                                                                                                   |  |  | 12<br>1 |
| CC | G0:00<br>98687 | chromosomal region                                    | 206/5692 | 337/186<br>78 | 9.91<br>E-32 | 2.35<br>E-29 | 1.62<br>E-29                                                                                                                                                                                                                                                                                   |  |  | 20<br>6 |
| CC | G0:00<br>44454 | nuclear chromosome part                               | 257/5692 | 469/186<br>78 | 1.50<br>E-28 | 2.67<br>E-26 | 1.84<br>E-26                                                                                                                                                                                                                                                                                   |  |  | 25<br>7 |

|    |                |                                   |          |               |              |              |              |                                                                                                                                                                                                                                                                                                                                                                                                                                                                                                                                                                                                                                                                                                                                                                                                                                                                                                                                                                                                                                                                                                                                                                                                                                                                                                                                                                                                                                                                                                                                                                                                                                                                                                                                                                                                                                                                                                                                                                                                                                                                                                                                                                                                                                                                                                                                                                                                                                                                                                                                                                                                                                                                                                                                                                                                                                                                                                                                                                                                                                                                                                                                                                                                                                                                                                                                                                                                                                                                                                                                                                                                                                                                                                                                                                                                                                                                                                                                                                                                                                                                                                                                                                                                                                                                                                                                                                                                                                                                                                                                                                                                                                                                                                                                                                                                                                                                                                                                                                                                                                                                                                                                                                                                                                                                                                                                                                                                                                                                                                                                                                                                                                                                                                                                                                                                                                                                                                                                                                                                                                                                                                                                                                                                                                                                                                                                                                                                                                                                                                                                                                                                                                                                                                                                                                                                                                                                                                                                                                                                                                                                                                                                                                                                                                                                                                                                                                                                                                                                                                                                                                                                                                                                                                                                                                                                                                                                                                                                                                                                                                                                                                                                                                                                                                                                                                                                                                                                                                                                                                                                                                                                                                                                                                                                                                                                                                                                                                                                                                                                                                                                                                                                                                                                                                                                                                                         |                                                                                                   |
|----|----------------|-----------------------------------|----------|---------------|--------------|--------------|--------------|-------------------------------------------------------------------------------------------------------------------------------------------------------------------------------------------------------------------------------------------------------------------------------------------------------------------------------------------------------------------------------------------------------------------------------------------------------------------------------------------------------------------------------------------------------------------------------------------------------------------------------------------------------------------------------------------------------------------------------------------------------------------------------------------------------------------------------------------------------------------------------------------------------------------------------------------------------------------------------------------------------------------------------------------------------------------------------------------------------------------------------------------------------------------------------------------------------------------------------------------------------------------------------------------------------------------------------------------------------------------------------------------------------------------------------------------------------------------------------------------------------------------------------------------------------------------------------------------------------------------------------------------------------------------------------------------------------------------------------------------------------------------------------------------------------------------------------------------------------------------------------------------------------------------------------------------------------------------------------------------------------------------------------------------------------------------------------------------------------------------------------------------------------------------------------------------------------------------------------------------------------------------------------------------------------------------------------------------------------------------------------------------------------------------------------------------------------------------------------------------------------------------------------------------------------------------------------------------------------------------------------------------------------------------------------------------------------------------------------------------------------------------------------------------------------------------------------------------------------------------------------------------------------------------------------------------------------------------------------------------------------------------------------------------------------------------------------------------------------------------------------------------------------------------------------------------------------------------------------------------------------------------------------------------------------------------------------------------------------------------------------------------------------------------------------------------------------------------------------------------------------------------------------------------------------------------------------------------------------------------------------------------------------------------------------------------------------------------------------------------------------------------------------------------------------------------------------------------------------------------------------------------------------------------------------------------------------------------------------------------------------------------------------------------------------------------------------------------------------------------------------------------------------------------------------------------------------------------------------------------------------------------------------------------------------------------------------------------------------------------------------------------------------------------------------------------------------------------------------------------------------------------------------------------------------------------------------------------------------------------------------------------------------------------------------------------------------------------------------------------------------------------------------------------------------------------------------------------------------------------------------------------------------------------------------------------------------------------------------------------------------------------------------------------------------------------------------------------------------------------------------------------------------------------------------------------------------------------------------------------------------------------------------------------------------------------------------------------------------------------------------------------------------------------------------------------------------------------------------------------------------------------------------------------------------------------------------------------------------------------------------------------------------------------------------------------------------------------------------------------------------------------------------------------------------------------------------------------------------------------------------------------------------------------------------------------------------------------------------------------------------------------------------------------------------------------------------------------------------------------------------------------------------------------------------------------------------------------------------------------------------------------------------------------------------------------------------------------------------------------------------------------------------------------------------------------------------------------------------------------------------------------------------------------------------------------------------------------------------------------------------------------------------------------------------------------------------------------------------------------------------------------------------------------------------------------------------------------------------------------------------------------------------------------------------------------------------------------------------------------------------------------------------------------------------------------------------------------------------------------------------------------------------------------------------------------------------------------------------------------------------------------------------------------------------------------------------------------------------------------------------------------------------------------------------------------------------------------------------------------------------------------------------------------------------------------------------------------------------------------------------------------------------------------------------------------------------------------------------------------------------------------------------------------------------------------------------------------------------------------------------------------------------------------------------------------------------------------------------------------------------------------------------------------------------------------------------------------------------------------------------------------------------------------------------------------------------------------------------------------------------------------------------------------------------------------------------------------------------------------------------------------------------------------------------------------------------------------------------------------------------------------------------------------------------------------------------------------------------------------------------------------------------------------------------------------------------------------------------------------------------------------------------------------------------------------------------------------------------------------------------------------------------------------------------------------------------------------------------------------------------------------------------------------------------------------------------------------------------------------------------------------------------------------------------------------------------------------------------------------------------------------------------------------------------------------------|---------------------------------------------------------------------------------------------------|
| CC | G0:00<br>16607 | nuclear speck                     | 216/5692 | 386/186<br>78 | 8.89<br>E-26 | 1.27<br>E-23 | 8.72<br>E-24 | REXO4/SURF2/PRPF31/H2AFX/TIMM50/NXT1/SNRPA1/PRPF6/AKAP8L/ARL6IP4/PIIH/SNRNP70/ALYREF/SF3A2/GADD45A/NUGGC/NR3C1/NAMPT/AR/GLI3/FEV/LPXN/IL16/IL15/LIMK1/PYHIN1/SREK1/SRSF11/FNBP4/PNISR/PNN/DDX17/LUC7L3/BAZ2A/POLI/RBM25/DDX39B/MAML1/CCNL1/ZNF621/RBM39/SRRM2/S100BPB/CCNL2/ZNF638/SF3B1/ACIN1/PRPF40B/EP400/FAM76B/SRSF10/CLK3/NFKBIZ/RBBP6/CPSF6/GPATCH2/SMURF2/SNURF/TCF12/KMT2E/SRSF6/PRPF40A/SRSF2/U2AF1/SFPQ/YTHDC1/NXF1/CDK13/SMC4/PRPF4B/SETD1B/DENND1B/RNF34/CLK2/ATXN2L/CDK12/SART3/RNF169/SRSF1/RBM4/DDX42/THOC2/AKAP17A/PHF7/BCAS2/SPOP/HEXIM2/RNPS1/CARMIL1/AAGAB/GLIS2/PIAS2/BARD1/EFTUD2/UNC45A/U2AF2/CDYL/PIAS3/SF3A3/CD2BP2/DGKZ/DUSP11/HNRNPU/HAUS6/POLR3D/DHX15/TCF3/MORF4L1/RSRC1/WAC/SAP130/STK17A/NCAPG2/NSRP1/DDX39A/RBM14/GATAD2A/TARDBP/NFATC4/AP5Z1/ARHGAP18/SMNDC1/BNIP3L/PPP1CC/EIF4ENIF1/TRIP12/CHTOP/PPP1R8/MECOM/CWC22/SNRPB2/SETD1A/OIP5/RUFY1/SRSF3/PRPF4/PIIE/PSPC1/EHMT2/LUC7L2/SNRNP40/MBD1/RBM15B/TOE1/ZMIZ1/CXXC1/RMI2/CASC3/SF3B2/USP22/HP1BP3/DDX46/MAML2/RBM10/CIR1/EIF4A3/CBX4/WTAP/NONO/USP36/ZC3H18/POLR2D/SARNP/THRAP3/CBL1/WRN/APBB1/PRPF3/MSX2/STK19/TRIM69/CRNKL1/SNW1/RFXAP/HIF1A/IK/RCHY1/BRD2/GTF2H4/MAPK14/CDC5L/ZNF830/PIAS1/GATAD2B/METTL3/RING1/SMC6/PUM1/RREB1/TAB1/RBM27/ERBIN/PP1G/CWC25/BRD1/POLDIP3/PPP4R3B/PIP5K1A/SF3A1/DHX36/YLPM1/SLU7/SON/CACTIN/SRSF4/APEX1/DYRK1A/PLCB1/BCLAF1/TEPSIN/SPRTN/TRIP11/GLYR1/MAML3/FOXO4/SRRM1<br>IPO4/TRIM28/HSF1/BEND3/EXOSC4/RUVBL2/EXOSC5/CHAC1/H2AFX/DSCC1/EIF3E/PELP1/CSNK2B/NOP53/HMGA2/DNMT3A/AKAP8L/HMGA1/COPS9/KAT2A/TFPT/SMARCB1/KMT5C/H2AFY2/AR/PINK1/RUNX2/RUNX3/CCND2/FANK1/SPI1/EOMES/IKZF1/DPF1/PML/GATA3/ZEB2/ACTB/ZNF385A/BAZ2A/ORC2/SP1/FAM111A/HIST4H4/MAU2/PHF12/EP400/CREB1/L3MBTL1/BRD8/RIF1/CPSF6/PAWR/DDX11/SINHCAF/POGZ/BPTF/USP3/TCF12/KMT2E/ESCO1/ICE2/SFPQ/SS18/SUDS3/MED1/INO80/MUC1/HMGXB4/ATRX/DFFB/SMARCD1/TAF1/RSF1/TAF4/ICE1/SDR16C5/MECP2/SMARCD1/H2AFY/FBH1/SMAD2/CBX3/MTA3/MTA2/POLA1/CHD4/RUVBL1/RAD51/CSNK2A1/SMARCD3/RBMX/CBX1/CHEK1/H2AFZ/PLK1/RBBP4/RAN/DVL3/EED/CBX5/MCRS1/CENPA/UBA1/ACTL6A/IST1/HDAC2/TIPIN/RBBP7/CHAF1B/EZH2/CCAR2/POLR3D/ASF1B/TCF3/MORF4L1/CSNK2A2/BUD31/EXOSC10/SFR1/EME1/KDM1A/SMARCA4/XRCC1/DNMT1/INCENP/CENPF/HMGNA4/HAT1/SLF1/MCM2/DPF2/RAD51AP1/NASP/RARG/E2F4/GATAD2A/MBD2/RCC1/BRD9/TRRAP/TARDBP/MTBP/CENPB/PCGF2/DFFA/HDAC1/CDA5/HNRNPC/DHX9/ACTR8/NCAPD3/LOXL2/NCOR2/UHRF1/PARBP/BAZ1B/SUV39H2/CBX2/CHD3/SETD1A/MSH6/OIP5/LDB1/ESCO2/EHMT2/HMGB2/CDK4/MCM7/PCNA/UBE2A/HNRNPK/SMARCA5/EXOSC3/SMARCE1/RPA2/CREB3L1/WDR82/HP1BP3/RNF2/RAD21/HMGN1/HELLS/HTRA2/WDR76/CHAF1A/HIST1H4H/STRT6/SUZ12/SIN3A/TBP/TCP1/RFX3/PHC2/SMARCC2/E2F1/ZC3H8/FER/HIF1A/SMARCC1/BICRAL/LEMD2/KDM1B/NFRKB/UBR2/ING3/MORC2/SMC3/TTC21B/GATAD2B/RING1/SLF2/DDX6/SMAD3/TOX4/ARID1A/UHRF2/H2AFV/WAPL/YY1/INO80E/ANP32E/PDS5B/STAG1/CREBBP/KAT5/CALCOCO1/CENPC/HIST1H3E/H3F3B/PDS5A/TIMELESS/YEATS4/CBX8/MTA1/TBX6/SMAD4/YY1AP1/SOS1/NUCKS1/SLX4/TOP2B/SOS2/STAG2/CREB3L2/UPF1/RNF20/PPP1R10/PLCB1/MPHOSPH8/PPARD/ETV3/AHCTF1/TTC37/SIRT7/HIST1H2BN/TAF5/GLYR1/NCOA3/GABPA/RNF40/SMC8/SRF<br>RPS24/RPL18/RPS3/RPL14/RPS21/RPL7A/RPS19/RPL37/RPL27A/RPL8/RPL32/RPSA/RPL12/RPS16/RPL28/RPL35/RPS2/RPL37A/RPL6/RPS5/RPS7/RPL23A/RPL29/RPL24/RPS17/RPS8/RPL13A/RPL18A/RPS11/RPL7/RPL3/RPS9/RPL35A/RPL9/RPL31/RPL13/RPL2/RPL38/RPL36A/RPS18/RPL4/RPS6/RPLP0/RPL5/RPS10/RPL15/RPL27/RPS27A/RPL30/RPS20/RPL23/RPL11/RPS12/RPS3A/RPL36/RPL19/RPLP1/RPS13/RPS15/RPS15A/RPL10A/RPS28/RPS23/RPS14/RPS25/RPL17/UBA52/RPL34/RPL41/RPS29/RPS27/RPL26/RPL21/RPL39/RPS4X/RPL22/GEMIN5/EIF2D<br>RPS3/HSF1/MZT2A/MZT2B/AURKB/BCCIP/ERCC2/KAT2A/RANGAP1/RAE1/ARHGEF2/NR3C1/ACOT13/HAUS4/MAP7D1/LRMP/CEP44/WDR73/CEP95/CEP170/SPICE1/EFHC1/MAPKB1/ATM/KLHL42/KATNBL1/KIF3A/ZNF207/WDR60/RIF1/MAK/YEATS2/DDX11/MTCL1/CEP295/MAP9/DID01/INO80/HAUS3/PKHD1/CLASP1/IQCB1/TUBG2/LATS1/SPIN1/TUBGCP6/ECT2/KIF2A/CEP162/TTC23L/MAPRE1/CEP19/CEP89/CBX3/GPSM2/RAB11A/RCC2/NDE1/MAP4/KIF23/CALM2/MAEA/BUB1B/SHCBP1/TMEM201/DYNC1L11/TOPBP1/SPDL1/SPDL1/CDC25B/PLK1/CDC7/KIF11/TACC3/KIF20A/DCTN1/PRC1/MAP1S/KIF18B/RACGAP1/CSNK1D/KATNAL2/KIF4A/EML2/CIAO1/CDC6/MAD2L1/CENPE/WDR62/HNRNPU/HAUS6/DLGA5/CKAP2L/HAUS2/FAM110A/KIF18A/ATA1/CDC20/SAK1/ARL8B/INCENP/CENPF/NUP85/HAUS1/KNTC1/AUNIP/NUP62/PKP4/TTK/ANXA11/CCNB1/CDK1/TUBG1/CDC42/AGBL5/SGO1/KIF15/HASPIN/FBX05/HAUS8/TPX2/KIF20B/CKAP5/CLTC/FBF1/TCTEX1D2/MMS19/NEK2/KNSTRN/TBL1XR1/ODF2/PPP2CA/CTTN/AAAS/UNC119/ALMS1/SKA3/SPAG8/KATNA1/KIF14/CD27/PSRC1/HAUS5/BOD1/VRK1/RAD21/CEP63/FAM161A/CKAP2/DYNLT1/MZT1/CTDP1/AURKA/POC1B/NIN/CRMP1/DYNLL1/IK/NPM1/BRCC3/MAPK14/NUMA1/GOLGA2/SMC3/TPR/MAPK1/CLASP2/STAG1/CEP350/CSPP1/CUL3/SMC1A/SPAST/TUBGCP4/MAD2L1BP/TUBGCP5/DCTN4/STAG2/ZW10/BIRC6/ABRAXAS2/TBCCD1/NEK7/CEP85/CDK5RAP2/TUBGCP3/PARP4/E4F1<br>HSF1/AURKB/DSCC1/PPP2R1A/CENPM/DNMT3A/RANGAP1/KMT5C/CDT1/KAT2B/CENPX/IKZF1/RASSF2/PPP1R12A/ORC2/ZNF276/KANSL1/ZNF207/DYNC1L12/TP53BP1/PKHD1/CLASP1/ATRX/CTCF/XPO1/CENPS/ITGB3BP/DCTN2/DCTN5/H2AFY/CBX3/RCC2/NDE1/BUB1B/BUB1/DYNC1L11/KIF2C/SGO2/CBX1/ERCC6L/SPDL1/ZWILCH/PLK1/CENPI/NUP107/DCTN1/CDCA8/CBX5/CENPH/CENPL/CENPA/CENPK/NCAPG/MAD2L1/CENPE/HNRNPU/SPC25/KIF18A/DNMT1/SAK1/INCENP/CENPF/NDC80/NUP37/NUP85/NUP43/KNTC1/HJURP/TTK/CCNB1/NUP2/PHF6/MTBP/SGO1/CENPB/ZWINT/CDCA5/PPP1CC/NCAPD3/BAZ1B/DSN1/CKAP5/SUV39H2/CENPW/CENPN/CENPQ/ESCO2/NEK2/KNSTRN/BIRC5/PPP2CA/SKA3/BUB3/BOD1/CE<br>NPT/RAD21/HELLS/SIN3A/CENPU/DYNLL1/DAXX/SMC3/TPR/KAT8/WAPL/PDS5B/PHF2/NUP160/CLASP2/STAG1/SMC1A/CENPC/PDS5A/NUP133/DCTN4/KMT5B/STAG2/ZW10/NGDN/AHCTF1/MIS12/NUP98/UVRAG<br>SNRPD2/SNRPF/SNRPD1/SNRPB/PABPC1/SNRPA1/LSM2/SNRPG/ISY1/SNRPD3/PRPF6/RALY/SNRPE/ALYREF/SF3A2/PNN/HNRNPH1/SRRM2/SF3B1/PPWD1/U2AF1/DDX5/PRPF4B/ZCC8/SRSF1/BCAS2/CWC27/EFTUD2/RBMX/SF3A3/SNRNP200/DDX23/HNRNPU/BUD31/HNRNPA2B1/DHX8/HNRNPR/SF3B3/HNRNPA3/HNRNPC/CWC22/SNRPB2/PIIE/SNRNP40/DHX35/HNRNPK/DHX38/SF3B2/HNRNPM/EIF4A3/HNRNPA1/MTREX/SYNCRIP/AQR/RBM22/DDX41/CRNKL1/SNW1/ESS2/CDC5L/GPATCH1/SF3A1/PPIL3/PPIL1/SLU7/CACTIN/HNRNPF/SRRM1<br>TRIM28/HSF1/RUVBL2/ARID3A/PELP1/CSNK2B/HMGA2/DNMT3A/HMGA1/KAT2A/SUPT5H/SMARCB1/H2AFY2/CDT1/SETD7/KAT2B/AR/BEND6/NKX6-1/DMRT1/GLI3/TFAP2B/RUNX2/M<br>EIS3/GLI1/TSHZ3/PRDM1/EOMES/MEOX1/CGAS/HOXC13/HOXD10/ACTB/CCNT2/PHF21A/MLLT6/ZNF354B/PWWP2A/MRNIP/EP400/MBD6/CCNT1/L3MBTL1/MLLT3/HDAC7/MITF/ZNF431/MBD5/EZH1/DDX11/USP3/DDX5/SFPQ/NSD1/MED1/ERCC6/MNT/ATRX/RNF169/NSD2/CTCF/BAHCC1/CENPS/HESX1/SMARCD1/H2AFY/SMAD2/MTA3/MTA2/POLA1/THRA/FAAP24/C<br>HD4/RAD51/RBL1/SMARCD3/RBMX/CBX1/NAP1L4/ORC1/H2AFZ/RBBP4/MCM8/CDYL/RAN/RNF4/CBX5/SIN3B/CENPA/HCF1/ACTL6A/MSH2/HDAC2/MEIS1/CHAF1B/EZH2/POLQ/HNRN<br>PU/CTBP2/POLR3D/DDX11/YBX1/TICRR/TOP2A/FUS/EXO1/KDM1A/SMARCA4/WAC/DNMT1/SSRP1/CENPF/RBPJ/HMGNA4/NUP62/POLD1/E2F4/MBD2/RCC1/PRDM11/HINFP/CDK1/HNRNP<br>D/GTF2H1/PCLAF/MED12/NUDT21/NCOA6/TRIM37/CENPB/HDAC1/CDCA5/HNRNPC/DHX9/CHD8/CKS2/UHRF1/RERE/UBE2T/CBX2/MSH6/POLR2B/LDB1/POLR1A/UBTF/ADNP/NCOA5/T<br>TC5/EHMT2/PKN1/PCNA/SMARCA5/SMARCE1/CREB3L1/HP1BP3/RNF2/VRK1/CBX4/GTF2F1/HMGN1/NONO/CHAF1A/STRT6/ACTN4/SP3/SUZ12/MLH1/SIN3A/GMNN/DNTTIP1/WRN/PYG<br>O2/APBB1/CIC/ATF2/SMARCC2/SSBP1/TOP1/SMARCC1/FABP1/BRD2/PBX2/JARID2/ZKSCAN3/MLH3/SETDB1/MORC2/TNRC18/ASH1L/SMC3/GATAD2B/PRIMPOL/MLLT10/TPR/RING1<br>/SMAD3/ARID1A/SAFB/BRD3/PATZ1/CREBBP/NELFE/STAT5B/FANCM/MCM3AP/YAP1/SMC1A/CALCOCO1/SATB2/ZNF304/H3F3B/ZNF274/EP300/MTA1/REST/BMI1/SMAD4/ELK4/NUC<br>KS1/TOP2B/APEX1/RNF8/POLG/UPF1/RNF20/MPHOSPH8/CRTC2/POLR3A/SIRT7/KDM5A/URI1/NUP98/PBRM1/GABPA/FOXO4/DHX30/SRF/CLOCK/BRIP1/ZIC2/MCM9<br>RECQL4/RUVBL2/DSCC1/ERCC2/CHD2/CHD6/DDX11/BPTF/ERCC3/RAD51D/MRE11/DNA2/TF2/INO80/HELB/ERCC6/ATRX/CHD1/RAD51C/FBH1/CHD4/RUVBL1/RAD51/ERCC6L/RBBP<br>4/XRCC2/RFC2/MCM6/POLQ/RFC4/MCM4/TOP2A/SMARCAL1/SMARCA4/GTF2H1/BLM/DHX9/CHD8/XRCC5/CHD3/PIF1/RFC3/MCM7/CHTF18/RFC5/WRN/RECQL/RAD54B/GTF2H4/RAD50<br>/RFC1/FANCM/DHX36/TOP2B/GTF2H3/BRIP1<br>RECQL4/RUVBL2/TWINK/ERCC2/DDX56/DDX17/DDX47/DDX39B/EP400/CHD2/SRCAP/YTHDC2/HELZ/CHD6/DDX11/DDX5/ERCC3/MRE11/DNA2/TF2/HELB/EIF4A1/ATRX/SMARCD1/C<br>HD1/DDX42/BTAF1/RECQL5/FBH1/DDX27/RAD54L/CHD4/RUVBL1/ERCC6L/DDX52/MCM8/SNRNP200/DDX23/MCM6/MCM3/DHX15/DDX1/MCM4/SMARCAL1/SMARCA4/MCM2/DDX39A/DHX<br>8/DDX20/BLM/DHX9/CHD8/XRCC5/CHD3/PIF1/DDX55/MCM7/SMARCA5/GTF2F2/DDX46/DDX31/EIF4A3/HELLS/DDX18/AQR/WRN/DDX41/RECQL/DDX49/DDX50/RAD54B/DHX16/EIF4<br>A2/HLTF/DDX6/RAD50/FANCM/DHX36/UPF1/ERCC6L2/HELQ/DHX30/BRIP1/MCM9<br>TONSL/WRAP53/PIH1D1/H2AFX/ING5/PYGO1/JAK2/MYSM1/BAZ2A/MLLT6/PHIP/KMT2A/MTF2/PWWP2A/CHD2/L3MBTL1/MLLT3/ZMYND8/EZH1/SPIN3/YEATS2/BPTF/USP3/KMT2E/U<br>SP49/TP53BP1/ATAD2B/ATRX/UMC1/SART3/TAF1/RSF1/SPIN1/CHD1/NCAPD2/PHF19/RBBP4/CDYL/CBX5/CHAF1B/ASF1B/PTMA/SET/SMARCA4/MCM2/DPF2/NCAPG2/NASP/HJURP<br>/MSL3/RCC1/HINFP/PHF6/BRD9/PWP1/CHD8/NCAPD3/UHRF1/BAZ1B/CBX2/MSH6/TBL1XR1/PKN1/SMARCA5/SPIN4/VRK1/KDM4A/CBX4/SUZ12/PYGO2/APBB1/FAM156A/NPM1/DEK/<br>BRD2/MBTD1/KDM1B/PHF1/DAXX/ING3/MLLT10/UHRF2/SUPT6H/KAT8/ANP32E/BRD3/PHF2/SPY2D1/BRD1/MCM3AP/IP07/ZMYND11/CBX8/RNF8/RNF20/MPHOSPH8/KDM5A/RBBP5/<br>GLYR1/CARM1/IP09/KDM5B<br>EMG1/PUS1/WDR4/EXOSC4/EXOSC5/TRMT1/EXOSC7/SARS2/POLR1C/POP7/CD3EAP/METTL1/TRMT2A/QARS/FARSB/DDX56/EXOSC2/RPP30/WARS/TRDMT1/RNASE6/PAN3/DDX17/CNO<br>T6/SLFN13/DDX39B/AGO3/CNOT2/TRMT10B/YTHDC2/TENT2/TYW5/TRMT13/DGCR8/DDX5/TUT4/EIF4A1/POLR2M/TRIT1/METTL2A/NARS/DROSHA/WARS2/RNASEH1/NSUN4/NT5C3A/ | 21<br>6<br>26<br>3<br>78<br>18<br>8<br>12<br>3<br>68<br>24<br>1<br>56<br>84<br>10<br>2<br>14<br>3 |
| CC | G0:00<br>00785 | chromatin                         | 263/5692 | 500/186<br>78 | 1.45<br>E-25 | 1.72<br>E-23 | 1.18<br>E-23 |                                                                                                                                                                                                                                                                                                                                                                                                                                                                                                                                                                                                                                                                                                                                                                                                                                                                                                                                                                                                                                                                                                                                                                                                                                                                                                                                                                                                                                                                                                                                                                                                                                                                                                                                                                                                                                                                                                                                                                                                                                                                                                                                                                                                                                                                                                                                                                                                                                                                                                                                                                                                                                                                                                                                                                                                                                                                                                                                                                                                                                                                                                                                                                                                                                                                                                                                                                                                                                                                                                                                                                                                                                                                                                                                                                                                                                                                                                                                                                                                                                                                                                                                                                                                                                                                                                                                                                                                                                                                                                                                                                                                                                                                                                                                                                                                                                                                                                                                                                                                                                                                                                                                                                                                                                                                                                                                                                                                                                                                                                                                                                                                                                                                                                                                                                                                                                                                                                                                                                                                                                                                                                                                                                                                                                                                                                                                                                                                                                                                                                                                                                                                                                                                                                                                                                                                                                                                                                                                                                                                                                                                                                                                                                                                                                                                                                                                                                                                                                                                                                                                                                                                                                                                                                                                                                                                                                                                                                                                                                                                                                                                                                                                                                                                                                                                                                                                                                                                                                                                                                                                                                                                                                                                                                                                                                                                                                                                                                                                                                                                                                                                                                                                                                                                                                                                                                                         |                                                                                                   |
| CC | G0:00<br>22626 | cytosolic ribosome                | 78/5692  | 95/1867<br>8  | 2.42<br>E-25 | 2.46<br>E-23 | 1.70<br>E-23 |                                                                                                                                                                                                                                                                                                                                                                                                                                                                                                                                                                                                                                                                                                                                                                                                                                                                                                                                                                                                                                                                                                                                                                                                                                                                                                                                                                                                                                                                                                                                                                                                                                                                                                                                                                                                                                                                                                                                                                                                                                                                                                                                                                                                                                                                                                                                                                                                                                                                                                                                                                                                                                                                                                                                                                                                                                                                                                                                                                                                                                                                                                                                                                                                                                                                                                                                                                                                                                                                                                                                                                                                                                                                                                                                                                                                                                                                                                                                                                                                                                                                                                                                                                                                                                                                                                                                                                                                                                                                                                                                                                                                                                                                                                                                                                                                                                                                                                                                                                                                                                                                                                                                                                                                                                                                                                                                                                                                                                                                                                                                                                                                                                                                                                                                                                                                                                                                                                                                                                                                                                                                                                                                                                                                                                                                                                                                                                                                                                                                                                                                                                                                                                                                                                                                                                                                                                                                                                                                                                                                                                                                                                                                                                                                                                                                                                                                                                                                                                                                                                                                                                                                                                                                                                                                                                                                                                                                                                                                                                                                                                                                                                                                                                                                                                                                                                                                                                                                                                                                                                                                                                                                                                                                                                                                                                                                                                                                                                                                                                                                                                                                                                                                                                                                                                                                                                                         |                                                                                                   |
| CC | G0:00<br>05819 | spindle                           | 188/5692 | 326/186<br>78 | 1.09<br>E-24 | 9.69<br>E-23 | 6.68<br>E-23 |                                                                                                                                                                                                                                                                                                                                                                                                                                                                                                                                                                                                                                                                                                                                                                                                                                                                                                                                                                                                                                                                                                                                                                                                                                                                                                                                                                                                                                                                                                                                                                                                                                                                                                                                                                                                                                                                                                                                                                                                                                                                                                                                                                                                                                                                                                                                                                                                                                                                                                                                                                                                                                                                                                                                                                                                                                                                                                                                                                                                                                                                                                                                                                                                                                                                                                                                                                                                                                                                                                                                                                                                                                                                                                                                                                                                                                                                                                                                                                                                                                                                                                                                                                                                                                                                                                                                                                                                                                                                                                                                                                                                                                                                                                                                                                                                                                                                                                                                                                                                                                                                                                                                                                                                                                                                                                                                                                                                                                                                                                                                                                                                                                                                                                                                                                                                                                                                                                                                                                                                                                                                                                                                                                                                                                                                                                                                                                                                                                                                                                                                                                                                                                                                                                                                                                                                                                                                                                                                                                                                                                                                                                                                                                                                                                                                                                                                                                                                                                                                                                                                                                                                                                                                                                                                                                                                                                                                                                                                                                                                                                                                                                                                                                                                                                                                                                                                                                                                                                                                                                                                                                                                                                                                                                                                                                                                                                                                                                                                                                                                                                                                                                                                                                                                                                                                                                                         |                                                                                                   |
| CC | G0:00<br>00775 | chromosome, centromeric region    | 123/5692 | 185/186<br>78 | 4.28<br>E-24 | 3.39<br>E-22 | 2.33<br>E-22 |                                                                                                                                                                                                                                                                                                                                                                                                                                                                                                                                                                                                                                                                                                                                                                                                                                                                                                                                                                                                                                                                                                                                                                                                                                                                                                                                                                                                                                                                                                                                                                                                                                                                                                                                                                                                                                                                                                                                                                                                                                                                                                                                                                                                                                                                                                                                                                                                                                                                                                                                                                                                                                                                                                                                                                                                                                                                                                                                                                                                                                                                                                                                                                                                                                                                                                                                                                                                                                                                                                                                                                                                                                                                                                                                                                                                                                                                                                                                                                                                                                                                                                                                                                                                                                                                                                                                                                                                                                                                                                                                                                                                                                                                                                                                                                                                                                                                                                                                                                                                                                                                                                                                                                                                                                                                                                                                                                                                                                                                                                                                                                                                                                                                                                                                                                                                                                                                                                                                                                                                                                                                                                                                                                                                                                                                                                                                                                                                                                                                                                                                                                                                                                                                                                                                                                                                                                                                                                                                                                                                                                                                                                                                                                                                                                                                                                                                                                                                                                                                                                                                                                                                                                                                                                                                                                                                                                                                                                                                                                                                                                                                                                                                                                                                                                                                                                                                                                                                                                                                                                                                                                                                                                                                                                                                                                                                                                                                                                                                                                                                                                                                                                                                                                                                                                                                                                                         |                                                                                                   |
| CC | G0:00<br>71013 | catalytic step 2 spliceosome      | 68/5692  | 82/1867<br>8  | 9.53<br>E-23 | 6.79<br>E-21 | 4.68<br>E-21 |                                                                                                                                                                                                                                                                                                                                                                                                                                                                                                                                                                                                                                                                                                                                                                                                                                                                                                                                                                                                                                                                                                                                                                                                                                                                                                                                                                                                                                                                                                                                                                                                                                                                                                                                                                                                                                                                                                                                                                                                                                                                                                                                                                                                                                                                                                                                                                                                                                                                                                                                                                                                                                                                                                                                                                                                                                                                                                                                                                                                                                                                                                                                                                                                                                                                                                                                                                                                                                                                                                                                                                                                                                                                                                                                                                                                                                                                                                                                                                                                                                                                                                                                                                                                                                                                                                                                                                                                                                                                                                                                                                                                                                                                                                                                                                                                                                                                                                                                                                                                                                                                                                                                                                                                                                                                                                                                                                                                                                                                                                                                                                                                                                                                                                                                                                                                                                                                                                                                                                                                                                                                                                                                                                                                                                                                                                                                                                                                                                                                                                                                                                                                                                                                                                                                                                                                                                                                                                                                                                                                                                                                                                                                                                                                                                                                                                                                                                                                                                                                                                                                                                                                                                                                                                                                                                                                                                                                                                                                                                                                                                                                                                                                                                                                                                                                                                                                                                                                                                                                                                                                                                                                                                                                                                                                                                                                                                                                                                                                                                                                                                                                                                                                                                                                                                                                                                                         |                                                                                                   |
| MF | G0:00<br>03682 | chromatin binding                 | 241/5644 | 437/169<br>69 | 1.48<br>E-21 | 1.50<br>E-18 | 1.26<br>E-18 |                                                                                                                                                                                                                                                                                                                                                                                                                                                                                                                                                                                                                                                                                                                                                                                                                                                                                                                                                                                                                                                                                                                                                                                                                                                                                                                                                                                                                                                                                                                                                                                                                                                                                                                                                                                                                                                                                                                                                                                                                                                                                                                                                                                                                                                                                                                                                                                                                                                                                                                                                                                                                                                                                                                                                                                                                                                                                                                                                                                                                                                                                                                                                                                                                                                                                                                                                                                                                                                                                                                                                                                                                                                                                                                                                                                                                                                                                                                                                                                                                                                                                                                                                                                                                                                                                                                                                                                                                                                                                                                                                                                                                                                                                                                                                                                                                                                                                                                                                                                                                                                                                                                                                                                                                                                                                                                                                                                                                                                                                                                                                                                                                                                                                                                                                                                                                                                                                                                                                                                                                                                                                                                                                                                                                                                                                                                                                                                                                                                                                                                                                                                                                                                                                                                                                                                                                                                                                                                                                                                                                                                                                                                                                                                                                                                                                                                                                                                                                                                                                                                                                                                                                                                                                                                                                                                                                                                                                                                                                                                                                                                                                                                                                                                                                                                                                                                                                                                                                                                                                                                                                                                                                                                                                                                                                                                                                                                                                                                                                                                                                                                                                                                                                                                                                                                                                                                         |                                                                                                   |
| MF | G0:00<br>08094 | DNA-dependent ATPase activity     | 56/5644  | 72/1696<br>9  | 1.09<br>E-14 | 5.54<br>E-12 | 4.64<br>E-12 |                                                                                                                                                                                                                                                                                                                                                                                                                                                                                                                                                                                                                                                                                                                                                                                                                                                                                                                                                                                                                                                                                                                                                                                                                                                                                                                                                                                                                                                                                                                                                                                                                                                                                                                                                                                                                                                                                                                                                                                                                                                                                                                                                                                                                                                                                                                                                                                                                                                                                                                                                                                                                                                                                                                                                                                                                                                                                                                                                                                                                                                                                                                                                                                                                                                                                                                                                                                                                                                                                                                                                                                                                                                                                                                                                                                                                                                                                                                                                                                                                                                                                                                                                                                                                                                                                                                                                                                                                                                                                                                                                                                                                                                                                                                                                                                                                                                                                                                                                                                                                                                                                                                                                                                                                                                                                                                                                                                                                                                                                                                                                                                                                                                                                                                                                                                                                                                                                                                                                                                                                                                                                                                                                                                                                                                                                                                                                                                                                                                                                                                                                                                                                                                                                                                                                                                                                                                                                                                                                                                                                                                                                                                                                                                                                                                                                                                                                                                                                                                                                                                                                                                                                                                                                                                                                                                                                                                                                                                                                                                                                                                                                                                                                                                                                                                                                                                                                                                                                                                                                                                                                                                                                                                                                                                                                                                                                                                                                                                                                                                                                                                                                                                                                                                                                                                                                                                         |                                                                                                   |
| MF | G0:00<br>04386 | helicase activity                 | 84/5644  | 128/169<br>69 | 6.10<br>E-14 | 2.06<br>E-11 | 1.73<br>E-11 |                                                                                                                                                                                                                                                                                                                                                                                                                                                                                                                                                                                                                                                                                                                                                                                                                                                                                                                                                                                                                                                                                                                                                                                                                                                                                                                                                                                                                                                                                                                                                                                                                                                                                                                                                                                                                                                                                                                                                                                                                                                                                                                                                                                                                                                                                                                                                                                                                                                                                                                                                                                                                                                                                                                                                                                                                                                                                                                                                                                                                                                                                                                                                                                                                                                                                                                                                                                                                                                                                                                                                                                                                                                                                                                                                                                                                                                                                                                                                                                                                                                                                                                                                                                                                                                                                                                                                                                                                                                                                                                                                                                                                                                                                                                                                                                                                                                                                                                                                                                                                                                                                                                                                                                                                                                                                                                                                                                                                                                                                                                                                                                                                                                                                                                                                                                                                                                                                                                                                                                                                                                                                                                                                                                                                                                                                                                                                                                                                                                                                                                                                                                                                                                                                                                                                                                                                                                                                                                                                                                                                                                                                                                                                                                                                                                                                                                                                                                                                                                                                                                                                                                                                                                                                                                                                                                                                                                                                                                                                                                                                                                                                                                                                                                                                                                                                                                                                                                                                                                                                                                                                                                                                                                                                                                                                                                                                                                                                                                                                                                                                                                                                                                                                                                                                                                                                                                         |                                                                                                   |
| MF | G0:00<br>42393 | histone binding                   | 102/5644 | 174/169<br>69 | 5.02<br>E-12 | 1.27<br>E-09 | 1.07<br>E-09 |                                                                                                                                                                                                                                                                                                                                                                                                                                                                                                                                                                                                                                                                                                                                                                                                                                                                                                                                                                                                                                                                                                                                                                                                                                                                                                                                                                                                                                                                                                                                                                                                                                                                                                                                                                                                                                                                                                                                                                                                                                                                                                                                                                                                                                                                                                                                                                                                                                                                                                                                                                                                                                                                                                                                                                                                                                                                                                                                                                                                                                                                                                                                                                                                                                                                                                                                                                                                                                                                                                                                                                                                                                                                                                                                                                                                                                                                                                                                                                                                                                                                                                                                                                                                                                                                                                                                                                                                                                                                                                                                                                                                                                                                                                                                                                                                                                                                                                                                                                                                                                                                                                                                                                                                                                                                                                                                                                                                                                                                                                                                                                                                                                                                                                                                                                                                                                                                                                                                                                                                                                                                                                                                                                                                                                                                                                                                                                                                                                                                                                                                                                                                                                                                                                                                                                                                                                                                                                                                                                                                                                                                                                                                                                                                                                                                                                                                                                                                                                                                                                                                                                                                                                                                                                                                                                                                                                                                                                                                                                                                                                                                                                                                                                                                                                                                                                                                                                                                                                                                                                                                                                                                                                                                                                                                                                                                                                                                                                                                                                                                                                                                                                                                                                                                                                                                                                                         |                                                                                                   |
| MF | G0:01<br>40098 | catalytic activity, acting on RNA | 143/5644 | 268/169<br>69 | 7.21<br>E-12 | 1.46<br>E-09 | 1.22<br>E-09 |                                                                                                                                                                                                                                                                                                                                                                                                                                                                                                                                                                                                                                                                                                                                                                                                                                                                                                                                                                                                                                                                                                                                                                                                                                                                                                                                                                                                                                                                                                                                                                                                                                                                                                                                                                                                                                                                                                                                                                                                                                                                                                                                                                                                                                                                                                                                                                                                                                                                                                                                                                                                                                                                                                                                                                                                                                                                                                                                                                                                                                                                                                                                                                                                                                                                                                                                                                                                                                                                                                                                                                                                                                                                                                                                                                                                                                                                                                                                                                                                                                                                                                                                                                                                                                                                                                                                                                                                                                                                                                                                                                                                                                                                                                                                                                                                                                                                                                                                                                                                                                                                                                                                                                                                                                                                                                                                                                                                                                                                                                                                                                                                                                                                                                                                                                                                                                                                                                                                                                                                                                                                                                                                                                                                                                                                                                                                                                                                                                                                                                                                                                                                                                                                                                                                                                                                                                                                                                                                                                                                                                                                                                                                                                                                                                                                                                                                                                                                                                                                                                                                                                                                                                                                                                                                                                                                                                                                                                                                                                                                                                                                                                                                                                                                                                                                                                                                                                                                                                                                                                                                                                                                                                                                                                                                                                                                                                                                                                                                                                                                                                                                                                                                                                                                                                                                                                                         |                                                                                                   |

|    |                |                                       |          |               |              |              |              |                                                                                                                                                                                                                                                                                                                                                                                                                                                                                                                                                                                                                                                                                                                                                                                                                                                                                                                                                                                                                                                                                                                                                                                                                                                                                                                                                                                                                                                                                                                                                                                                                                                                                                                                                                                                                                                                                                                                                                                                                                                                                                                                                                                                                                                                                                                                                                                                                                                                                                                                                                                                                                                                                                                                                                                                                                                                                                                                                                                                                                                                                                                                                                                                                                                                                                                                                                                                                                                                                                                                                                                                                                                                                                                                                                                                                                                                                                                                                                                                                                                                                                                                                                                                                                                                                                                                                                          |         |
|----|----------------|---------------------------------------|----------|---------------|--------------|--------------|--------------|--------------------------------------------------------------------------------------------------------------------------------------------------------------------------------------------------------------------------------------------------------------------------------------------------------------------------------------------------------------------------------------------------------------------------------------------------------------------------------------------------------------------------------------------------------------------------------------------------------------------------------------------------------------------------------------------------------------------------------------------------------------------------------------------------------------------------------------------------------------------------------------------------------------------------------------------------------------------------------------------------------------------------------------------------------------------------------------------------------------------------------------------------------------------------------------------------------------------------------------------------------------------------------------------------------------------------------------------------------------------------------------------------------------------------------------------------------------------------------------------------------------------------------------------------------------------------------------------------------------------------------------------------------------------------------------------------------------------------------------------------------------------------------------------------------------------------------------------------------------------------------------------------------------------------------------------------------------------------------------------------------------------------------------------------------------------------------------------------------------------------------------------------------------------------------------------------------------------------------------------------------------------------------------------------------------------------------------------------------------------------------------------------------------------------------------------------------------------------------------------------------------------------------------------------------------------------------------------------------------------------------------------------------------------------------------------------------------------------------------------------------------------------------------------------------------------------------------------------------------------------------------------------------------------------------------------------------------------------------------------------------------------------------------------------------------------------------------------------------------------------------------------------------------------------------------------------------------------------------------------------------------------------------------------------------------------------------------------------------------------------------------------------------------------------------------------------------------------------------------------------------------------------------------------------------------------------------------------------------------------------------------------------------------------------------------------------------------------------------------------------------------------------------------------------------------------------------------------------------------------------------------------------------------------------------------------------------------------------------------------------------------------------------------------------------------------------------------------------------------------------------------------------------------------------------------------------------------------------------------------------------------------------------------------------------------------------------------------------------------------------|---------|
| MF | GO:01<br>40097 | catalytic activity,<br>acting on DNA  | 91/5644  | 152/169<br>69 | 1.38<br>E-11 | 2.34<br>E-09 | 1.96<br>E-09 | CPSF3/DBR1/SNRNP200/METTL6/DDX23/YARS2/DHX15/QTRT2/DDX1/EXOSC10/EXO1/FTSJ1/POPI/GARS/POLR3F/TRMT9B/USB1/TRNT1/DHX8/DDX20/MARS/PNPT1/IARS/ERI1/RP<br>P25/DIMT1/EDC3/LARS/DHX9/EPRS/MRM2/PPP1R8/DALRD3/POLR1A/PIF1/JMJD6/TOE1/ZCCHC4/TARS/FEN1/EXOSC3/HARS2/RPP38/TRMT2B/KARS/DARS2/PCIF1/CNOT8/PARN/X<br>RN2/RNMT/EIF4A3/NSUN3/BUD23/DDX18/POLR3C/POLR2D/MED20/MED21/RNASEH2A/RAD54B/QRSL1/RIDA/RNASE4/AZGP1/ANG/AARS2/DHX16/CMTR1/CDKAL1/EIF4A2/PRIMPOL/<br>METTL3/DDX6/DIS3L2/TYW1/VARS2/RPAP1/DHX36/PAN2/SLU7/AARSD1/VARS/ALKBH8/APEX1/FARS2/MRM1/UPF1/RPP21/TDP2/POLR3A/TGS1/CNOT1/DCP2/ISG20L2/RAMAC/DHX<br>30<br>RPS3/RECQL4/NME1/RUVBL2/TWNK/CHRAC1/HMGA2/ERCC2/DNMT3A/SMUG1/POLL/TEP1/POLI/CHD2/TDG/DDX11/ERCC3/MRE11/DNA2/HELB/GEN1/POLM/ATRX/DFFB/CHD1/RECQL5<br>/MUTYH/RAD51C/FBH1/RBBP8/POLA1/RAD54L/CHD4/RUVBL1/DCLRE1C/ERCC6L/RAD1/MCM6/POLQ/MGME1/DDX1/POLD3/MCM4/TOP2A/EXO1/SMARCAL1/XRCC1/DNMT1/POLD1/BLM/<br>DHX9/CHD8/APEX2/XRCC5/CHD3/DKC1/EXD2/PIF1/MUS81/MCM7/PCNA/FEN1/POLA2/LIG1/NEIL3/WRN/RECQL/RAD54B/TOP1/POLE3/SETMAR/POLH/LIG3/PRIMPOL/RAD50/RAD9A<br>/FANCM/DHX36/ZRANB3/EXO5/SLX4/TOP2B/APEX1/FAN1/POLG/THAP9/TDP2/TOP3B/DCLRE1A/BRIP1/MCM9<br>REX04/TRIM28/TONSL/RUVBL2/SOX12/PFDN5/SUPT3H/PRPF6/HMGA2/UBE2L3/RALY/DNMT3A/HMGA1/KAT2A/RFXANK/HSBP1/SMARCB1/LPIN2/KAT2B/IL31RA/BEND6/TFAP2B/TFE<br>C/HDAC9/PRRX1/BATF3/FEV/CIIITA/LPXN/TRERF1/GATA3/MYSM1/DDX17/NR2C2/TCERG1/MAML1/N4BP2L2/CNOT2/ZMIZ2/PHF12/SUPT20H/SP4/CREB1/SRCAP/HDAC7/TDG/KLF7/<br>ZNF136/ZMYND8/SUPT7L/EZH1/MAK/PAWR/GON4L/MED23/MRTFB/SRSF2/TP53BP1/MED14/SS18/NSD1/GPS2/MED1/MEIS2/MUC1/ASXL1/MNT/CBFA2T2/MED15/NFE2L3/ATN1/TAF1<br>/CTCF/TAF4/CCAR1/SDR16C5/MECP2/NSD3/BCL10/SPEN/PSMC3IP/SMARCD1/PRMT2/RBBP8/TRIP13/KCTD1/E2F6/RUVBL1/PIAS2/SMARCD3/MCIDAS/CDYL/RNF4/TRIM32/MED22/<br>HCFC1/PPP1R13L/ACTL6A/EZH2/HNRNPU/CTBP2/TCF3/DDX1/BUD31/MRTFA/FUS/SFR1/KDM1A/SMARCA4/BRC1A/DPF2/WDR77/RBM14/MED17/ABL1/MYCBP/TRIP4/HINFP/GMEB1/T<br>RRAP/MED12/SOX4/NFATC4/NCOA6/KMT5A/MED7/HDAC1/YBX3/DHX9/NFYC/NCOR2/RERE/MED24/AEBP2/ATXN7L3/GTF2A2/LDB1/PTPN14/GRIP1/MMS19/HMGB2/TBL1XR1/PKN1/JM<br>JD6/HSF2/BCL9L/MAP3K10/SMARCE1/ZNF85/BHLHE41/ATF7IP/SUB1/MTF1/USP22/USP21/MAML2/TFDP1/CIR1/CBX4/GTF2F1/ECD/CTBP1/SIRT6/ACTN4/TSG101/NME2/PSMD9/S<br>F1/GMNN/THRAP3/MED21/MSX2/SMARCC2/SNW1/RFXAP/SAP30/E2F8/MED19/SMARCC1/NPM1/NR1I3/RXR/RNF451/TAF11/ABT1/DAXX/PIAS1/SCAI/TCF20/SMAD3/UBE3A/BOR/A<br>RID1A/RBFOX2/YY1/NPAT/PHF2/BCL9/CREBBP/KAT5/YAP1/CALCOCO1/GMEB2/ZNF274/HMGB1/EP300/ZMYND11/GTF2A1/MTA1/MED13/SMAD4/ELK4/ZFX/APEX1/SERTAD2/RNF20/<br>BIRC2/CASP8AP2/TDP2/KDM5A/URI1/SUFU/NUP98/TRIP11/CARM1/MAML3/NCOA3/GABPA/PIAS4/KDM5B/E4F1/TFDP2/OLIG3<br>REX04/TRIM28/SOX12/SUPT3H/PRPF6/UBE2L3/HMGA1/KAT2A/SMARCB1/LPIN2/KAT2B/IL31RA/TFAP2B/TFEC/PRRX1/CIIITA/TRERF1/GATA3/MYSM1/DDX17/NR2C2/TCERG1/MAML<br>1/ZMIZ2/SP4/SRCAP/KLF7/SUPT7L/MAK/MED23/MRTFB/MED14/SS18/GPS2/MED1/ASXL1/MNT/NFE2L3/TAF1/TAF4/CCAR1/NSD3/BCL10/PSMC3IP/SMARCD1/PRMT2/RUVBL1/PIAS<br>2/SMARCD3/MCIDAS/RNF4/TRIM32/HCFC1/ACTL6A/CTBP2/TCF3/BUD31/MRTFA/FUS/SFR1/KDM1A/SMARCA4/BRC1A/WDR77/RBM14/MED17/ABL1/MYCBP/TRIP4/HINFP/GMEB1/MED<br>12/SOX4/NFATC4/NCOA6/MED7/DHX9/NFYC/RERE/MED24/ATXN7L3/GTF2A2/GRIP1/MMS19/HMGB2/PKN1/JMJD6/HSF2/BCL9L/SMARCE1/SUB1/MTF1/USP22/USP21/MAML2/TFDP1/<br>GTF2F1/ECD/ACTN4/TSG101/NME2/PSMD9/THRAP3/MED21/SMARCC2/SNW1/RFXAP/SMARCC1/NPM1/NR1I3/RXR/RNF451/TAF11/ABT1/DAXX/PIAS1/TCF20/UBE3A/ARID1A/YY1/NPAT/PHF<br>2/BCL9/CREBBP/KAT5/YAP1/CALCOCO1/GMEB2/HMGB1/EP300/GTF2A1/MTA1/MED13/ZFX/APEX1/SERTAD2/RNF20/BIRC2/KDM5A/NUP98/TRIP11/CARM1/MAML3/NCOA3/GABPA/E4<br>F1<br>RECQL4/RUVBL2/CD320/DSCC1/ERCC2/DDX56/ATP5F1E/LONP2/MYO1B/TNNT3/ATP13A2/ABCD2/DDX17/DDX39B/KIF3A/CHD2/YTHDC2/CHD6/DDX11/BPTF/DDX5/ERCC3/RAD51D/A<br>BCC1/MRE11/DNA2/TTF2/INO80/HELB/ERCC6/EIF4A1/ATRX/ATP1A3/CHD1/RAD51C/FBH1/ATP1B3/CHD4/RUVBL1/RAD51/ATP2C1/DYNC1H1/ERCC6L/DYNC2LI1/RBBP4/SNRNP200<br>/XRCC2/RFC2/DDX23/MCM6/POLQ/RFC4/DDX1/MCM4/CCT8/TOP2A/SMARCAL1/KIF18A/SMARCA4/ATP6V1E1/ATP6V1F/ATP1A1/ATP13A1/NSF/ATP5F1B/ATAD5/DHX8/DDX20/ATP7A<br>/GTF2H1/BLM/ATP6V1E2/ABCC4/DHX9/CHD8/KIF20B/XRCC5/CHD3/ABCB9/PIF1/RFC3/MCM7/CHTF18/RFC5/DYNC2H1/YME1L1/ATP10D/KATNA1/KIF14/MYO3A/EIF4A3/ATP5F1A/<br>DDX18/WRN/RECQL/RAD54B/TAP1/ABCB4/GTF2H4/EIF4A2/RAD50/ATP6AP1L/RFC1/HSP90AB1/FANCM/SPAST/DHX36/ATP8B1/TOP2B/RALBP1/UPF1/GTF2H3/DHX30/BRIP1 | 91      |
| MF | GO:00<br>03712 | transcription<br>coregulator activity | 233/5644 | 494/169<br>69 | 5.72<br>E-11 | 8.29<br>E-09 | 6.95<br>E-09 | RRAP/MED12/SOX4/NFATC4/NCOA6/KMT5A/MED7/HDAC1/YBX3/DHX9/NFYC/NCOR2/RERE/MED24/AEBP2/ATXN7L3/GTF2A2/LDB1/PTPN14/GRIP1/MMS19/HMGB2/TBL1XR1/PKN1/JM<br>JD6/HSF2/BCL9L/MAP3K10/SMARCE1/ZNF85/BHLHE41/ATF7IP/SUB1/MTF1/USP22/USP21/MAML2/TFDP1/CIR1/CBX4/GTF2F1/ECD/CTBP1/SIRT6/ACTN4/TSG101/NME2/PSMD9/S<br>F1/GMNN/THRAP3/MED21/MSX2/SMARCC2/SNW1/RFXAP/SAP30/E2F8/MED19/SMARCC1/NPM1/NR1I3/RXR/RNF451/TAF11/ABT1/DAXX/PIAS1/SCAI/TCF20/SMAD3/UBE3A/BOR/A<br>RID1A/RBFOX2/YY1/NPAT/PHF2/BCL9/CREBBP/KAT5/YAP1/CALCOCO1/GMEB2/ZNF274/HMGB1/EP300/ZMYND11/GTF2A1/MTA1/MED13/SMAD4/ELK4/ZFX/APEX1/SERTAD2/RNF20/<br>BIRC2/CASP8AP2/TDP2/KDM5A/URI1/SUFU/NUP98/TRIP11/CARM1/MAML3/NCOA3/GABPA/PIAS4/KDM5B/E4F1/TFDP2/OLIG3<br>REX04/TRIM28/SOX12/SUPT3H/PRPF6/UBE2L3/HMGA1/KAT2A/SMARCB1/LPIN2/KAT2B/IL31RA/TFAP2B/TFEC/PRRX1/CIIITA/TRERF1/GATA3/MYSM1/DDX17/NR2C2/TCERG1/MAML<br>1/ZMIZ2/SP4/SRCAP/KLF7/SUPT7L/MAK/MED23/MRTFB/MED14/SS18/GPS2/MED1/ASXL1/MNT/NFE2L3/TAF1/TAF4/CCAR1/NSD3/BCL10/PSMC3IP/SMARCD1/PRMT2/RUVBL1/PIAS<br>2/SMARCD3/MCIDAS/RNF4/TRIM32/HCFC1/ACTL6A/CTBP2/TCF3/BUD31/MRTFA/FUS/SFR1/KDM1A/SMARCA4/BRC1A/WDR77/RBM14/MED17/ABL1/MYCBP/TRIP4/HINFP/GMEB1/MED<br>12/SOX4/NFATC4/NCOA6/MED7/DHX9/NFYC/RERE/MED24/ATXN7L3/GTF2A2/GRIP1/MMS19/HMGB2/PKN1/JMJD6/HSF2/BCL9L/SMARCE1/SUB1/MTF1/USP22/USP21/MAML2/TFDP1/<br>GTF2F1/ECD/ACTN4/TSG101/NME2/PSMD9/THRAP3/MED21/SMARCC2/SNW1/RFXAP/SMARCC1/NPM1/NR1I3/RXR/RNF451/TAF11/ABT1/DAXX/PIAS1/TCF20/UBE3A/ARID1A/YY1/NPAT/PHF<br>2/BCL9/CREBBP/KAT5/YAP1/CALCOCO1/GMEB2/HMGB1/EP300/GTF2A1/MTA1/MED13/ZFX/APEX1/SERTAD2/RNF20/BIRC2/KDM5A/NUP98/TRIP11/CARM1/MAML3/NCOA3/GABPA/E4<br>F1<br>RECQL4/RUVBL2/CD320/DSCC1/ERCC2/DDX56/ATP5F1E/LONP2/MYO1B/TNNT3/ATP13A2/ABCD2/DDX17/DDX39B/KIF3A/CHD2/YTHDC2/CHD6/DDX11/BPTF/DDX5/ERCC3/RAD51D/A<br>BCC1/MRE11/DNA2/TTF2/INO80/HELB/ERCC6/EIF4A1/ATRX/ATP1A3/CHD1/RAD51C/FBH1/ATP1B3/CHD4/RUVBL1/RAD51/ATP2C1/DYNC1H1/ERCC6L/DYNC2LI1/RBBP4/SNRNP200<br>/XRCC2/RFC2/DDX23/MCM6/POLQ/RFC4/DDX1/MCM4/CCT8/TOP2A/SMARCAL1/KIF18A/SMARCA4/ATP6V1E1/ATP6V1F/ATP1A1/ATP13A1/NSF/ATP5F1B/ATAD5/DHX8/DDX20/ATP7A<br>/GTF2H1/BLM/ATP6V1E2/ABCC4/DHX9/CHD8/KIF20B/XRCC5/CHD3/ABCB9/PIF1/RFC3/MCM7/CHTF18/RFC5/DYNC2H1/YME1L1/ATP10D/KATNA1/KIF14/MYO3A/EIF4A3/ATP5F1A/<br>DDX18/WRN/RECQL/RAD54B/TAP1/ABCB4/GTF2H4/EIF4A2/RAD50/ATP6AP1L/RFC1/HSP90AB1/FANCM/SPAST/DHX36/ATP8B1/TOP2B/RALBP1/UPF1/GTF2H3/DHX30/BRIP1                                                                                                                                                                                                                                                                                                                                                                                                                                                                                                                                                                                                                                                                                                                                                                                                                                                                                                                                                                                                                                                                                                                                                                                                                                                                                                                                                                                                                                                                                                                                                                                                                                                                                                                                                                                                                                                                                                                                                   | 23<br>3 |
| MF | GO:00<br>03713 | transcription<br>coactivator activity | 145/5644 | 285/169<br>69 | 4.69<br>E-10 | 5.94<br>E-08 | 4.98<br>E-08 | REX04/TRIM28/SOX12/SUPT3H/PRPF6/UBE2L3/HMGA1/KAT2A/SMARCB1/LPIN2/KAT2B/IL31RA/TFAP2B/TFEC/PRRX1/CIIITA/TRERF1/GATA3/MYSM1/DDX17/NR2C2/TCERG1/MAML<br>1/ZMIZ2/SP4/SRCAP/KLF7/SUPT7L/MAK/MED23/MRTFB/MED14/SS18/GPS2/MED1/ASXL1/MNT/NFE2L3/TAF1/TAF4/CCAR1/NSD3/BCL10/PSMC3IP/SMARCD1/PRMT2/RUVBL1/PIAS<br>2/SMARCD3/MCIDAS/RNF4/TRIM32/HCFC1/ACTL6A/CTBP2/TCF3/BUD31/MRTFA/FUS/SFR1/KDM1A/SMARCA4/BRC1A/WDR77/RBM14/MED17/ABL1/MYCBP/TRIP4/HINFP/GMEB1/MED<br>12/SOX4/NFATC4/NCOA6/MED7/DHX9/NFYC/RERE/MED24/ATXN7L3/GTF2A2/GRIP1/MMS19/HMGB2/PKN1/JMJD6/HSF2/BCL9L/SMARCE1/SUB1/MTF1/USP22/USP21/MAML2/TFDP1/<br>GTF2F1/ECD/ACTN4/TSG101/NME2/PSMD9/THRAP3/MED21/SMARCC2/SNW1/RFXAP/SMARCC1/NPM1/NR1I3/RXR/RNF451/TAF11/ABT1/DAXX/PIAS1/TCF20/UBE3A/ARID1A/YY1/NPAT/PHF<br>2/BCL9/CREBBP/KAT5/YAP1/CALCOCO1/GMEB2/HMGB1/EP300/GTF2A1/MTA1/MED13/ZFX/APEX1/SERTAD2/RNF20/BIRC2/KDM5A/NUP98/TRIP11/CARM1/MAML3/NCOA3/GABPA/E4<br>F1<br>RECQL4/RUVBL2/CD320/DSCC1/ERCC2/DDX56/ATP5F1E/LONP2/MYO1B/TNNT3/ATP13A2/ABCD2/DDX17/DDX39B/KIF3A/CHD2/YTHDC2/CHD6/DDX11/BPTF/DDX5/ERCC3/RAD51D/A<br>BCC1/MRE11/DNA2/TTF2/INO80/HELB/ERCC6/EIF4A1/ATRX/ATP1A3/CHD1/RAD51C/FBH1/ATP1B3/CHD4/RUVBL1/RAD51/ATP2C1/DYNC1H1/ERCC6L/DYNC2LI1/RBBP4/SNRNP200<br>/XRCC2/RFC2/DDX23/MCM6/POLQ/RFC4/DDX1/MCM4/CCT8/TOP2A/SMARCAL1/KIF18A/SMARCA4/ATP6V1E1/ATP6V1F/ATP1A1/ATP13A1/NSF/ATP5F1B/ATAD5/DHX8/DDX20/ATP7A<br>/GTF2H1/BLM/ATP6V1E2/ABCC4/DHX9/CHD8/KIF20B/XRCC5/CHD3/ABCB9/PIF1/RFC3/MCM7/CHTF18/RFC5/DYNC2H1/YME1L1/ATP10D/KATNA1/KIF14/MYO3A/EIF4A3/ATP5F1A/<br>DDX18/WRN/RECQL/RAD54B/TAP1/ABCB4/GTF2H4/EIF4A2/RAD50/ATP6AP1L/RFC1/HSP90AB1/FANCM/SPAST/DHX36/ATP8B1/TOP2B/RALBP1/UPF1/GTF2H3/DHX30/BRIP1                                                                                                                                                                                                                                                                                                                                                                                                                                                                                                                                                                                                                                                                                                                                                                                                                                                                                                                                                                                                                                                                                                                                                                                                                                                                                                                                                                                                                                                                                                                                                                                                                                                                                                                                                                                                                                                                                                                                                                                                                                                                                                                                                                                                                                                                                                                                                                                                                                                                                                                                                                                                                                                                          | 14<br>5 |
| MF | GO:00<br>42623 | ATPase activity, coupled              | 114/5644 | 218/169<br>69 | 4.44<br>E-09 | 5.01<br>E-07 | 4.19<br>E-07 | RECQL4/RUVBL2/TWNK/ERCC2/CHD2/DDX11/ERCC3/MRE11/DNA2/HELB/CHD1/RECQL5/FBH1/CHD4/RUVBL1/MCM6/MCM4/BLM/DHX9/CHD8/XRCC5/CHD3/PIF1/MCM7/WRN/RECQL/RA<br>D54B/RAD50/FANCM/DHX36/BRIP1/MCM9                                                                                                                                                                                                                                                                                                                                                                                                                                                                                                                                                                                                                                                                                                                                                                                                                                                                                                                                                                                                                                                                                                                                                                                                                                                                                                                                                                                                                                                                                                                                                                                                                                                                                                                                                                                                                                                                                                                                                                                                                                                                                                                                                                                                                                                                                                                                                                                                                                                                                                                                                                                                                                                                                                                                                                                                                                                                                                                                                                                                                                                                                                                                                                                                                                                                                                                                                                                                                                                                                                                                                                                                                                                                                                                                                                                                                                                                                                                                                                                                                                                                                                                                                                                    | 11<br>4 |
| MF | GO:00<br>03678 | DNA helicase activity                 | 32/5644  | 42/1696<br>9  | 1.46<br>E-08 | 1.48<br>E-06 | 1.24<br>E-06 | RECQL4/RUVBL2/TWNK/ERCC2/CHD2/DDX11/ERCC3/MRE11/DNA2/HELB/CHD1/RECQL5/FBH1/CHD4/RUVBL1/MCM6/MCM4/BLM/DHX9/CHD8/XRCC5/CHD3/PIF1/MCM7/WRN/RECQL/RA<br>D54B/RAD50/FANCM/DHX36/BRIP1/MCM9                                                                                                                                                                                                                                                                                                                                                                                                                                                                                                                                                                                                                                                                                                                                                                                                                                                                                                                                                                                                                                                                                                                                                                                                                                                                                                                                                                                                                                                                                                                                                                                                                                                                                                                                                                                                                                                                                                                                                                                                                                                                                                                                                                                                                                                                                                                                                                                                                                                                                                                                                                                                                                                                                                                                                                                                                                                                                                                                                                                                                                                                                                                                                                                                                                                                                                                                                                                                                                                                                                                                                                                                                                                                                                                                                                                                                                                                                                                                                                                                                                                                                                                                                                                    | 32      |

MF:Molecular Function, CC: Cellular ComponentBP: Biological Process, a p<0.05 indicates statistical significance.Statistically significant

Supplement File 3 The Top 10 Kyoto Encyclopedia of Genes and Genomes (KEGG) pathway

| ID       | Description                      | GeneRatio | BgRatio  | pvalue   | padjust  | qvalue   | geneID                                                                                                                                                                                                                                                                                                                                                                                                                                                                                                                                                                                                                                                                                                                                                                                                                                                                                                                                                                                                                                                                                                                                                                                                                                                                                                                                                                                                                                                                                                                                                                                                                                                                                                                                                                                                                                                                                                                                                                                                                                                                                                                                                                                                                                                                                                                                                                                                                                                                                                                                                                                                                                                                                                                                                                                                                                                                                                                                                                                                                                                             | Count |
|----------|----------------------------------|-----------|----------|----------|----------|----------|--------------------------------------------------------------------------------------------------------------------------------------------------------------------------------------------------------------------------------------------------------------------------------------------------------------------------------------------------------------------------------------------------------------------------------------------------------------------------------------------------------------------------------------------------------------------------------------------------------------------------------------------------------------------------------------------------------------------------------------------------------------------------------------------------------------------------------------------------------------------------------------------------------------------------------------------------------------------------------------------------------------------------------------------------------------------------------------------------------------------------------------------------------------------------------------------------------------------------------------------------------------------------------------------------------------------------------------------------------------------------------------------------------------------------------------------------------------------------------------------------------------------------------------------------------------------------------------------------------------------------------------------------------------------------------------------------------------------------------------------------------------------------------------------------------------------------------------------------------------------------------------------------------------------------------------------------------------------------------------------------------------------------------------------------------------------------------------------------------------------------------------------------------------------------------------------------------------------------------------------------------------------------------------------------------------------------------------------------------------------------------------------------------------------------------------------------------------------------------------------------------------------------------------------------------------------------------------------------------------------------------------------------------------------------------------------------------------------------------------------------------------------------------------------------------------------------------------------------------------------------------------------------------------------------------------------------------------------------------------------------------------------------------------------------------------------|-------|
| hsa03040 | Spliceosome                      | 95/2629   | 147/8105 | 7.27E-16 | 2.42E-13 | 2.12E-13 | SNU13/SNRPD2/SNRPF/SNRPA/SNRPD1/SNRPB/LSM8/PRPF31/CCDC12/LSM4/LSM7/SNRPA1/TXNL4A/LSM2/SNRPG/ISY1/SNRPD3/PRPF6/PIIH/SNRNP70/SNRPE/SNRPC/ALYREF/SF3A2/PRPF38B/TRA2A/TCERG1/RBM25/DDX39B/SF3B1/ACIN1/PRPF40B/SRSF10/SRSF6/PRPF40A/U2SURP/SRSF2/U2AF1/DDX5/SRSF1/DDX42/THOC2/BCAS2/PRPF38A/RBM17/NCBP2/USP39/EFTUD2/RBMX/SNRNP27/U2AF2/SF3A3/SNRNP200/DDX23/HNRNPU/DHX15/BUD31/FUS/DHX8/SF3B3/SMNDC1/HNRNPA3/HNRNPC/SNRPB2/SRSF3/PRPF4/SRSF9/PP1E/TRA2B/SNRNP40/HNRNPK/DHX38/SF3B2/DDX46/HNRNPM/SF3B6/EIF4A3/NCBP1/SF3B4/HNRNPA1/SRSF7/AQR/RBM22/HNRNPA1L2/PRPF3/CRNKL1/SNW1/DHX16/CDC5L/HSPA1L/WBP11/SF3A1/PPIL1/SLU7/SRSF4/PIK3R2/ZNF589/ZNF7/ALYREF/PIK3CD/IFNA1/FASLG/JAK2/PILRA/POU2F2/HLA-DQA1/HLA-DOA/SYK/CARD9/HLA-DMB/ZNF267/CGAS/PML/IFNG/LTA/HLA-DPB1/ZNF169/ZNF23/ZNF337/ZNF514/ZNF700/ZNF107/ZNF587/ZNF621/ZNF888/ZNF354B/ZNF182/ZNF12/ZNF195/ZNF841/ZNF432/ZNF224/ZNF605/ZNF26/ZNF84/ZNF791/ZNF708/RBAK/ZNF19/IRAK4/CASP8/ZNF248/ZNF736/ZNF641/ZNF737/ZNF431/ZNF136/ZNF333/ZNF91/ZFP90/ZNF8/TRAF5/ZNF713/ZNF33B/SRSF6/ZNF721/SRSF2/ZNF785/PILRB/NXF1/ZNF562/ZNF780B/ZNF43/ZNF273/POU2F1/TSC1/ZNF33A/SRSF1/ZNF44/ZNF124/ZNF519/ZNF550/ZNF439/ZNF611/ZNF558/TNF/ZNF101/IRF9/ZNF302/ZNF100/EIF2B3/BAK1/CYCS/ZNF714/PPP1CB/ZNF768/ZNF93/ZNF765/HCF1/ZNF430/EIF2B5/ZNF845/ZNF766/IKKBK/ZNF480/ZNF320/ZNF354A/ZNF486/ZNF675/ZNF816/PPP1CC/ZNF133/ZNF783/SRSF3/MAP3K7/ZNF160/SRSF9/ZNF436/AKT3/ZNF468/ZNF630/ZFP69B/TRAF2/ZNF283/ZNF81/ZNF211/ZNF229/ZNF718/ZFP69/ZNF85/ZNF761/ZNF544/RHEB/IKBEK/ZNF286A/ZNF2/ZNF506/ZNF607/ZNF37A/ZNF808/SRC/ZNF461/ZNF860/ZNF473/NECTIN1/ZNF529/ZNF316/ZNF551/ZNF14/MAVS/SRSF7/ZNF205/PIK3CB/ZNF382/ZNF669/ZNF426/ZNF778/ZNF132/ZNF530/TAP1/TRAF3/EIF2B2/C3/ZNF184/ZNF627/DAXX/ZFP14/ZNF546/ZNF189/SRPK1/ZNF606/ZNF343/ZNF212/ZNF383/ZNF543/ZNF567/ZNF764/ZNF234/ZNF74/ZNF3/ZNF616/ZNF443/ZNF317/TAB1/ZNF585A/ZNF527/ZNF235/ZNF548/ZNF561/ZNF571/ZNF891/ZNF45/ZNF689/ZNF528/ZNF510/ZNF41/ZNF225/ZNF417/ZNF112/ZSCAN32/ZNF799/ZNF304/ZNF180/ZNF253/ZNF619/ZNF441/ZNF324B/ZNF200/ZNF282/ZNF599/ZNF701/ZNF17/ZNF780A/ZNF440/ZNF227/ZNF623/ZNF786/ZNF585B/ZNF554/ZNF566/ZNF782/ZNF792/ZNF398/APAF1/ZNF772/ZNF300/ZNF140/SRSF4/ZNF573/BIRC2/ZNF823/TYK2/ZNF420/ZNF600/ZNF30/ZNF77/ZNF595/ZNF674/PIK3CA/ZNF658/ZNF613/ZNF620/TRAF6/ZNF559-ZNF177/ZNF836/ZNF181/ZNF155/ZNF793/RPS24/RPL18/RPS3/RPL14/RPS21/RPL7A/RPS19/RPL37/RPL27A/RPL8/RPL32/RPSA/RPL12/RPS16/RPL28/RPL35/RPS2/RPL37A/RPL6/RPS5/RPS7/RPL23A/RPL29/RPL24/RPS17/RPS8/RPL13A/RPL18A/RPS11/RPL7/RPL3/RPS9/RPL35A/RPL9/RPL31/RPL13/RPLP2/PIK3R2/RPL38/RPL36A/RPS18/RPL4/RPS6/RPLP0/RPL5/RPS10/RPL15/RPL27/RPS27A/RPL30/RPS20/RPL23/RPL11/RPS12/RPS3A/RPL36/RPL19/RPLP1/RPS13/RPS15/RPS15A/RPL10A/RPS28/RPS23/RPS14/RPS25/RPL17/UBA52/RPL34/RPL41/RPS29/RPS27/RPL26/RPL21/RPL39/RPS4X/FAU/RPL22/IL6ST/C6/C1R/C1S/TLR7/PIK3CD/IFNA1/C3AR1/FCGR2A/TLR8/MAPK10/CYBB/SYK/NLRP3/CASP1/CGAS/F2/IRAK4/ADAM17/TNF/IRF9/MAPK3/IKKBK/MAP3K7/IKBEK/MAPK13/PLCG1/MAVS/MAPK9/PIK3CB/TRAF3/C2/CFB/FGFB/C3/FGG/MBL2/FGA/F13B/C8A/MASP2/C8B/MAPK14/MAPK1/PRKCA/TYK2/PIK3CA/TRAF6/RSL24D1 | 95    |
| hsa05168 | Herpes simplex virus 1 infection | 243/2629  | 495/8105 | 1.58E-15 | 2.63E-13 | 2.31E-13 | 8/ZFP69/ZNF85/ZNF761/ZNF544/RHEB/IKBEK/ZNF286A/ZNF2/ZNF506/ZNF607/ZNF37A/ZNF808/SRC/ZNF461/ZNF860/ZNF473/NECTIN1/ZNF529/ZNF316/ZNF551/ZNF14/MAVS/SRSF7/ZNF205/PIK3CB/ZNF382/ZNF669/ZNF426/ZNF778/ZNF132/ZNF530/TAP1/TRAF3/EIF2B2/C3/ZNF184/ZNF627/DAXX/ZFP14/ZNF546/ZNF189/SRPK1/ZNF606/ZNF343/ZNF212/ZNF383/ZNF543/ZNF567/ZNF764/ZNF234/ZNF74/ZNF3/ZNF616/ZNF443/ZNF317/TAB1/ZNF585A/ZNF527/ZNF235/ZNF548/ZNF561/ZNF571/ZNF891/ZNF45/ZNF689/ZNF528/ZNF510/ZNF41/ZNF225/ZNF417/ZNF112/ZSCAN32/ZNF799/ZNF304/ZNF180/ZNF253/ZNF619/ZNF441/ZNF324B/ZNF200/ZNF282/ZNF599/ZNF701/ZNF17/ZNF780A/ZNF440/ZNF227/ZNF623/ZNF786/ZNF585B/ZNF554/ZNF566/ZNF782/ZNF792/ZNF398/APAF1/ZNF772/ZNF300/ZNF140/SRSF4/ZNF573/BIRC2/ZNF823/TYK2/ZNF420/ZNF600/ZNF30/ZNF77/ZNF595/ZNF674/PIK3CA/ZNF658/ZNF613/ZNF620/TRAF6/ZNF559-ZNF177/ZNF836/ZNF181/ZNF155/ZNF793/RPS24/RPL18/RPS3/RPL14/RPS21/RPL7A/RPS19/RPL37/RPL27A/RPL8/RPL32/RPSA/RPL12/RPS16/RPL28/RPL35/RPS2/RPL37A/RPL6/RPS5/RPS7/RPL23A/RPL29/RPL24/RPS17/RPS8/RPL13A/RPL18A/RPS11/RPL7/RPL3/RPS9/RPL35A/RPL9/RPL31/RPL13/RPLP2/PIK3R2/RPL38/RPL36A/RPS18/RPL4/RPS6/RPLP0/RPL5/RPS10/RPL15/RPL27/RPS27A/RPL30/RPS20/RPL23/RPL11/RPS12/RPS3A/RPL36/RPL19/RPLP1/RPS13/RPS15/RPS15A/RPL10A/RPS28/RPS23/RPS14/RPS25/RPL17/UBA52/RPL34/RPL41/RPS29/RPS27/RPL26/RPL21/RPL39/RPS4X/FAU/RPL22/IL6ST/C6/C1R/C1S/TLR7/PIK3CD/IFNA1/C3AR1/FCGR2A/TLR8/MAPK10/CYBB/SYK/NLRP3/CASP1/CGAS/F2/IRAK4/ADAM17/TNF/IRF9/MAPK3/IKKBK/MAP3K7/IKBEK/MAPK13/PLCG1/MAVS/MAPK9/PIK3CB/TRAF3/C2/CFB/FGFB/C3/FGG/MBL2/FGA/F13B/C8A/MASP2/C8B/MAPK14/MAPK1/PRKCA/TYK2/PIK3CA/TRAF6/RSL24D1                                                                                                                                                                                                                                                                                                                                                                                                                                                                                                                                                                                                                                                                                                                                                                                                                                                                                                                                                                                                                                                                                                                                                                                                                                                                                                                                                                                                                                                              | 243   |
| hsa05171 | Coronavirus disease - COVID-19   | 127/2629  | 232/8105 | 1.01E-12 | 1.12E-10 | 9.81E-11 | RPS24/RPL18/RPS3/RPL14/RPS21/RPL7A/RPS19/RPL37/RPL27A/RPL8/RPL32/RPSA/RPL12/RPS16/RPL28/RPL35/RPS2/RPL37A/RPL6/RPS5/RPS7/RPL23A/RPL29/RPL24/RPS17/RPS8/RPL13A/RPL18A/RPS11/RPL7/RPL3/RPS9/RPL35A/RPL9/RPL31/RPL13/RPLP2/PIK3R2/RPL38/RPL36A/RPS18/RPL4/RPS6/RPLP0/RPL5/RPS10/RPL15/RPL27/RPS27A/RPL30/RPS20/RPL23/RPL11/RPS12/RPS3A/RPL36/RPL19/RPLP1/RPS13/RPS15/RPS15A/RPL10A/RPS28/RPS23/RPS14/RPS25/RPL17/UBA52/RPL34/RPL41/RPS29/RPS27/RPL26/RPL21/RPL39/RPS4X/FAU/RPL22/IL6ST/C6/C1R/C1S/TLR7/PIK3CD/IFNA1/C3AR1/FCGR2A/TLR8/MAPK10/CYBB/SYK/NLRP3/CASP1/CGAS/F2/IRAK4/ADAM17/TNF/IRF9/MAPK3/IKKBK/MAP3K7/IKBEK/MAPK13/PLCG1/MAVS/MAPK9/PIK3CB/TRAF3/C2/CFB/FGFB/C3/FGG/MBL2/FGA/F13B/C8A/MASP2/C8B/MAPK14/MAPK1/PRKCA/TYK2/PIK3CA/TRAF6/RSL24D1                                                                                                                                                                                                                                                                                                                                                                                                                                                                                                                                                                                                                                                                                                                                                                                                                                                                                                                                                                                                                                                                                                                                                                                                                                                                                                                                                                                                                                                                                                                                                                                                                                                                                                                                                                                                                                                                                                                                                                                                                                                                                                                                                                                                                                                                                                             | 127   |
| hsa03460 | Fanconi anemia pathway           | 42/2629   | 54/8105  | 8.80E-12 | 7.31E-10 | 6.42E-10 | CENPX/POLI/EME2/REV1/ATR/FANCL/FANCF/CENPS/RPA3/RAD51C/FANCI/FAAP24/RAD51/FANCD2/FANCB/EME1/BRCA1/USP1/PALB2/BLM/FANCG/BRCA2/PMS2/UBE2T/FANCE/MUS81/RPA1/RPA2/RMI2/MLH1/TELO2/FANCA/POLH/WDR48/POLK/FANCM/RMI1/SLX4/FANI/FAAP100/TOP3B/BRIP1                                                                                                                                                                                                                                                                                                                                                                                                                                                                                                                                                                                                                                                                                                                                                                                                                                                                                                                                                                                                                                                                                                                                                                                                                                                                                                                                                                                                                                                                                                                                                                                                                                                                                                                                                                                                                                                                                                                                                                                                                                                                                                                                                                                                                                                                                                                                                                                                                                                                                                                                                                                                                                                                                                                                                                                                                       | 42    |
| hsa04110 | Cell cycle                       | 76/2629   | 126/8105 | 8.87E-11 | 5.89E-09 | 5.17E-09 | CDC25A/RBX1/E2F5/ANAPC7/GADD45A/CCND2/ORC2/ATM/ATR/ORC4/SMAD2/YWHAQ/YWHAB/BUB1B/BUB1/E2F3/RBL1/ANAPC4/CHEK1/ORC1/ORC6/CDC25B/PLK1/PKMYT1/CDC7/CDK2/YWHAH/DBF4/MCM6/HDAC2/MCM3/CDC6/MAD2L1/E2F2/MCM4/CDC45/CDC20/ANAPC1/YWHAQ/YWHAZ/MCM2/ZBTB17/E2F4/TTK/ABL1/CCNB2/CCNB1/CDK1/HDAC1/GSK3B/TGFB2/CDK4/MCM7/PCNA/PRKDC/TFDP1/BUB3/CD27/PTTG1/ORC5/ANAPC13/RAD21/CCND3/CCNA2/ANAPC5/E2F1/SMC3/SMAD3/STAG1/CREBBP/SMC1A/EP300/CDC23/SMAD4/STAG2/TFDP2                                                                                                                                                                                                                                                                                                                                                                                                                                                                                                                                                                                                                                                                                                                                                                                                                                                                                                                                                                                                                                                                                                                                                                                                                                                                                                                                                                                                                                                                                                                                                                                                                                                                                                                                                                                                                                                                                                                                                                                                                                                                                                                                                                                                                                                                                                                                                                                                                                                                                                                                                                                                                  | 76    |
| hsa03013 | Nucleocytoplasmic transport      | 66/2629   | 108/8105 | 7.07E-10 | 3.91E-08 | 3.44E-08 | IPO4/THOC5/NXT1/RANGAP1/RAE1/ALYREF/NUP93/PNN/DDX39B/ACIN1/NXF1/TNPO2/XPO1/THOC2/UBE2I/RNPS1/NCBP2/KPNB1/NDC1/XPO6/NUP107/RAN/NUP155/NUP205/XPO7/KPNA2/UPF3B/NUP188/KPNA4/NUP37/NUP85/NUP43/NUP62/CSE1L/IPO13/AAAS/XPOT/CASC3/SUMO2/EIF4A3/NCBP1/TNPO1/TNPO3/KPNA6/XPO4/XPO5/NUP35/NUP214/NUP153/POM121C/UPF3A/TPR/UPF2/NUP160/IPO7/POM121/NUP54/IPO11/NUP133/NUP58/UPF1/AHCTF1/IPO5/NUP98/IPO9/SRRM1                                                                                                                                                                                                                                                                                                                                                                                                                                                                                                                                                                                                                                                                                                                                                                                                                                                                                                                                                                                                                                                                                                                                                                                                                                                                                                                                                                                                                                                                                                                                                                                                                                                                                                                                                                                                                                                                                                                                                                                                                                                                                                                                                                                                                                                                                                                                                                                                                                                                                                                                                                                                                                                              | 66    |
| hsa03010 | Ribosome                         | 88/2629   | 158/8105 | 1.01E-09 | 4.81E-08 | 4.22E-08 | RPS24/RPL18/RPS3/RPL14/RPS21/RPL7A/RPS19/RPL37/RPL27A/RPL8/RPL32/RPSA/RPL12/RPS16/RPL28/RPL35/RPS2/RPL37A/RPL6/RPS5/RPS7/RPL23A/RPL29/RPL24/RPS17/RPS8/RPL13A/RPL18A/RPS11/RPL7/RPL3/RPS9/RPL35A/RPL9/RPL31/RPL13/RPLP2/RPL38/RPL36A/RPS18/RPL4/RPS6/RPLP0/RPL5/RPS10/RPL15/RPL27/RPS27A/RPL30/RPS20/RPL23/RPL11/RPS12/RPS3A/RPL36/RPL19/RPLP1/RPS13/RPS15/RPS15A/RPL10A/RPS28/RPS23/RPS14/RPS25/RPL17/UBA52/RPL34/RPL41/RPS29/RPS27/RPL26/RPL21/RPL39/RPS4X/MRPL11/MRPL14/FAU/RPL22/MRPL13/MRPL35/MRPL3/MRPL10/MRPL9/MRPL17/MRPS10/MRPL30/RSL24D1                                                                                                                                                                                                                                                                                                                                                                                                                                                                                                                                                                                                                                                                                                                                                                                                                                                                                                                                                                                                                                                                                                                                                                                                                                                                                                                                                                                                                                                                                                                                                                                                                                                                                                                                                                                                                                                                                                                                                                                                                                                                                                                                                                                                                                                                                                                                                                                                                                                                                                                 | 88    |
| hsa03440 | Homologous recombination         | 31/2629   | 41/8105  | 1.66E-08 | 6.89E-07 | 6.06E-07 | RAD52/ATM/RAD51D/MRE11/UIMC1/RPA3/RAD51C/RBBP8/RAD54L/RAD51/BARD1/BABAM2/TOPBP1/XRCC2/POLD3/EME1/BRCA1/PALB2/POLD1/BLM/BRCA2/MUS81/RPA1/RPA2/RAD54B/SSBP1/BRCC3/RAD50/ABRAXAS1/TOP3B/BRIP1                                                                                                                                                                                                                                                                                                                                                                                                                                                                                                                                                                                                                                                                                                                                                                                                                                                                                                                                                                                                                                                                                                                                                                                                                                                                                                                                                                                                                                                                                                                                                                                                                                                                                                                                                                                                                                                                                                                                                                                                                                                                                                                                                                                                                                                                                                                                                                                                                                                                                                                                                                                                                                                                                                                                                                                                                                                                         | 31    |
| hsa03030 | DNA replication                  | 27/2629   | 36/8105  | 1.92E-07 | 7.06E-06 | 6.20E-06 | DNA2/RPA3/POLA1/RNASEH1/RFC2/MCM6/MCM3/RFC4/PRIM2/POLD3/MCM4/MCM2/POLD1/RFC3/MCM7/PCNA/RFC5/FEN1/RPA1/POLA2/RPA2/LIG1/RNASEH2A/SSBP1/RNASEH2B/POLE3/RFC1                                                                                                                                                                                                                                                                                                                                                                                                                                                                                                                                                                                                                                                                                                                                                                                                                                                                                                                                                                                                                                                                                                                                                                                                                                                                                                                                                                                                                                                                                                                                                                                                                                                                                                                                                                                                                                                                                                                                                                                                                                                                                                                                                                                                                                                                                                                                                                                                                                                                                                                                                                                                                                                                                                                                                                                                                                                                                                           | 27    |
| hsa04120 | Ubiquitin mediated proteolysis   | 75/2629   | 142/8105 | 3.32E-07 | 1.10E-05 | 9.68E-06 | RPS27A/UBA52/RBX1/UBE2L3/UBE2S/UBE2C/ELOC/UBE2M/ANAPC7/PML/MAP3K1/CBL/FANCL/SMURF2/FBXW7/UBA6/FBXW11/KLHL9/UBE3B/CBLB/UBE2I/UBE2Z/PIAS2/ANAPC4/PIAS3/TRIM32/UBA1/UBE2Q2/UBA2/SAE1/RNF7/UBE2N/CDC20/ANAPC1/BRCA1/HUWE1/UBE2E1/TRIM37/RHOBTB2/UBE2D2/TRIP12/UBA3/CUL4B/ERCC8/UBE2J2/UBE2A/CUL2/UBE2D1/UBE2E3/SMURF1/CDC27/ANAPC13/ANAPC5/UBR5/DBB1/RCHY1/CUL7/UBE20/PIAS1/PPIL2/UBE3A/CUL5/HERC2/CUL3/NHLRC1/VHL/CDC23/BTRC/FBXW8/BIRC2/BIRC6/CUL4A/PIAS4/TRAF6/HERC4                                                                                                                                                                                                                                                                                                                                                                                                                                                                                                                                                                                                                                                                                                                                                                                                                                                                                                                                                                                                                                                                                                                                                                                                                                                                                                                                                                                                                                                                                                                                                                                                                                                                                                                                                                                                                                                                                                                                                                                                                                                                                                                                                                                                                                                                                                                                                                                                                                                                                                                                                                                                | 75    |

a p<0.05 indicates statistical significance. Statistically significant

Supplement File 4. The data of LncRNA microarray.

| P-value and FDR |        | Fold change and Regulation |            | Annotations |            |                      | Group--Raw Intensity  |                | Group--Normalized Intensity |                       | Raw Intensity         |                      |                      |                      |                      |                      | Normalized Intensity        |                             |                             |                             |                             |                             |           |
|-----------------|--------|----------------------------|------------|-------------|------------|----------------------|-----------------------|----------------|-----------------------------|-----------------------|-----------------------|----------------------|----------------------|----------------------|----------------------|----------------------|-----------------------------|-----------------------------|-----------------------------|-----------------------------|-----------------------------|-----------------------------|-----------|
| P-value         | FDR    | Fold Change                | Regulation | type        | seqname    | relations            | Associate d_gene_name | group-M1 (raw) | group-M2 (raw)              | group-M1 (normalized) | group-M2 (normalized) | [U937-M1-1, M1](raw) | [U937-M1-2, M1](raw) | [U937-M1-3, M1](raw) | [U937-M1-2, M2](raw) | [U937-M1-3, M2](raw) | [U937-M1-1, M1](normalized) | [U937-M1-2, M1](normalized) | [U937-M1-3, M1](normalized) | [U937-M2-1, M2](normalized) | [U937-M2-2, M2](normalized) | [U937-M2-3, M2](normalized) |           |
| 2.5662          | 0.0007 | 2.4642                     |            | noncod      |            |                      |                       | 1081.7         | 4269.9                      | 10.40301              | 11.70413              | 1029.916             |                      | 1280.466             |                      |                      |                             |                             |                             |                             |                             |                             |           |
| 9E-05           | 98285  | 014                        | down       | ing         | uc003hrl.1 | intergenic           |                       | 48533          | 12                          | 1                     | 1                     | 9                    | 934.8625             | 2                    | 3668.314             | 4438.904             | 4702.518                    | 10.373772                   | 10.338708                   | 10.4965515                  | 11.634016                   | 11.743604                   | 11.734772 |
| 4.2028          | 0.0003 | 2.5933                     |            | noncod      | ENST0000   |                      |                       | 2373.2         | 10108.                      | 11.55855              | 12.93335              | 2356.152             | 2103.607             | 2659.875             |                      | 10009.49             | 10939.56                    |                             |                             |                             |                             |                             |           |
| 7E-07           | 32251  | 214                        | down       | ing         | 0560415    | intergenic           |                       | 11567          | 78433                       | 7                     | 8                     | 3                    | 2                    | 9377.293             | 5                    | 5                    | 5                           | 11.578867                   | 11.520314                   | 11.57649                    | 12.952816                   | 12.912685                   | 12.934573 |
| 6.5944          | 0.0011 | 2.5882                     |            | noncod      |            |                      |                       | 9.7465         | 35.146                      |                       |                       |                      |                      | 31.47279             |                      |                      | 37.22803                    |                             |                             |                             |                             |                             |           |
| 1E-05           | 84473  | 38                         | down       | ing         | NR_038863  | intergenic           |                       | 66             | 936                         | 3.521968              | 4.893938              | 10.42352             | 9.203723             | 9.612455             | 2                    | 36.73998             | 5                           | 3.6444488                   | 3.5067835                   | 3.4146712                   | 4.8946333                   | 4.968136                    | 4.819045  |
| 0.0001          | 0.0017 | 2.4712                     |            | noncod      | ENST0000   | bidirectio           |                       | 32.057         | 110.69                      |                       |                       | 28.08492             | 30.43747             |                      | 108.2028             | 106.6654             | 117.2018                    |                             |                             |                             |                             |                             |           |
| 39873           | 16782  | 345                        | down       | ing         | 0434547    | nal                  | STK24                 | 345            | 004                         | 5.233518              | 6.53875               | 9                    | 5                    | 37.64963             | 8                    | 05                   | 36                          | 5.0890093                   | 5.270131                    | 5.341414                    | 6.642829                    | 6.481902                    | 6.491519  |
| 0.0449          | 0.0892 | 2.9028                     |            | noncod      | HMLincRN   |                      |                       | 13.637         | 47.181                      |                       |                       |                      | 11.23162             |                      | 43.16044             |                      | 46.66665                    |                             |                             |                             |                             |                             |           |
| 45449           | 30443  | 249                        | down       | ing         | A921+      | intergenic<br>intron |                       | 088            | 555                         | 3.776246              | 5.313703              | 6.042284             | 9                    | 23.63735             | 2                    | 51.71757             | 3                           | 2.8500438                   | 3.8060446                   | 4.6726484                   | 5.333574                    | 5.4542084                   | 5.153327  |
| 0.0001          | 0.0016 | 8.1501                     |            | noncod      | ENST0000   | sense-ove            |                       | 6.0345         | 64.977                      |                       |                       |                      | 4.999999             | 7.155351             | 54.44042             |                      | 70.51572                    |                             |                             |                             |                             |                             |           |
| 33579           | 758    | 111                        | down       | ing         | 0445310    | rlapping<br>intron   | KCNQ5                 | 81             | 555                         | 2.736288              | 5.763108              | 5.948393             | 5                    | 6                    | 2                    | 69.97652             | 4                           | 2.8287086                   | 2.3528795                   | 3.0272765                   | 5.6624274                   | 5.8770294                   | 5.749867  |
| 0.0001          | 0.0016 | 8.1501                     |            | noncod      | ENST0000   | sense-ove            |                       | 6.0345         | 64.977                      |                       |                       |                      | 4.999999             | 7.155351             | 54.44042             |                      | 70.51572                    |                             |                             |                             |                             |                             |           |
| 33579           | 758    | 111                        | down       | ing         | 0445310    | rlapping<br>intron   | KCNQ5                 | 81             | 555                         | 2.736288              | 5.763108              | 5.948393             | 5                    | 6                    | 2                    | 69.97652             | 4                           | 2.8287086                   | 2.3528795                   | 3.0272765                   | 5.6624274                   | 5.8770294                   | 5.749867  |
| 0.0001          | 0.0016 | 8.1501                     |            | noncod      | ENST0000   | sense-ove            |                       | 6.0345         | 64.977                      |                       |                       |                      | 4.999999             | 7.155351             | 54.44042             |                      | 70.51572                    |                             |                             |                             |                             |                             |           |
| 33579           | 758    | 111                        | down       | ing         | 0445310    | rlapping<br>intron   | KCNQ5                 | 81             | 555                         | 2.736288              | 5.763108              | 5.948393             | 5                    | 6                    | 2                    | 69.97652             | 4                           | 2.8287086                   | 2.3528795                   | 3.0272765                   | 5.6624274                   | 5.8770294                   | 5.749867  |
| 0.0001          | 0.0016 | 8.1501                     |            | noncod      | ENST0000   | sense-ove            |                       | 6.0345         | 64.977                      |                       |                       |                      | 4.999999             | 7.155351             | 54.44042             |                      | 70.51572                    |                             |                             |                             |                             |                             |           |
| 33579           | 758    | 111                        | down       | ing         | 0445310    | rlapping<br>intron   | KCNQ5                 | 81             | 555                         | 2.736288              | 5.763108              | 5.948393             | 5                    | 6                    | 2                    | 69.97652             | 4                           | 2.8287086                   | 2.3528795                   | 3.0272765                   | 5.6624274                   | 5.8770294                   | 5.749867  |
| 0.0001          | 0.0016 | 8.1501                     |            | noncod      | ENST0000   | sense-ove            |                       | 6.0345         | 64.977                      |                       |                       |                      | 4.999999             | 7.155351             | 54.44042             |                      | 70.51572                    |                             |                             |                             |                             |                             |           |
| 33579           | 758    | 111                        | down       | ing         | 0445310    | rlapping<br>intron   | KCNQ5                 | 81             | 555                         | 2.736288              | 5.763108              | 5.948393             | 5                    | 6                    | 2                    | 69.97652             | 4                           | 2.8287086                   | 2.3528795                   | 3.0272765                   | 5.6624274                   | 5.8770294                   | 5.749867  |
| 0.0008          | 0.0049 | 2.2078                     |            | noncod      |            | natural              |                       | 54.004         | 171.04                      |                       |                       |                      |                      | 138.5932             | 168.4875             | 206.0533             |                             |                             |                             |                             |                             |                             |           |
| 22081           | 82574  | 253                        | down       | ing         | NR_036497  | antisense            | LPP                   | 237            | 4723                        | 5.990044              | 7.13267               | 47.13774             | 48.79725             | 66.07772             | 9                    | 5                    | 3                           | 5.844401                    | 5.9656796                   | 6.1600523                   | 6.989405                    | 7.1209073                   | 7.2876987 |
| 8.9243          | 0.0013 | 2.9768                     |            | noncod      | ENST0000   |                      |                       | 25.812         | 108.24                      |                       |                       | 26.87691             |                      | 28.26438             | 94.94488             |                      | 129.9589                    |                             |                             |                             |                             |                             |           |
| 8E-05           | 79735  | 369                        | down       | ing         | 0413311    | intergenic           |                       | 163            | 4845                        | 4.918667              | 6.492447              | 7                    | 22.29519             | 3                    | 5                    | 99.83067             | 8                           | 5.021068                    | 4.8108964                   | 4.924037                    | 6.4495635                   | 6.385105                    | 6.6426735 |
| 2.3115          | 0.0007 | 2.4521                     |            | noncod      | ENST0000   |                      |                       | 873.38         | 3431.4                      | 10.09784              | 11.39189              | 813.8710             |                      | 1034.831             | 3023.494             |                      | 3774.761                    |                             |                             |                             |                             |                             |           |
| 2E-05           | 58104  | 541                        | down       | ing         | 0523028    |                      |                       | 1677           | 49967                       | 5                     | 5                     | 3                    | 771.4428             | 2                    | 4                    | 3496.094             | 5                           | 10.038029                   | 10.051138                   | 10.204368                   | 11.349338                   | 11.40947                    | 11.416876 |
| 0.0177          | 0.0440 | 2.0032                     |            | noncod      |            | sense-ove            | APITD1-               | 86.840         | 241.46                      |                       |                       |                      | 54.74469             | 111.5544             | 226.9637             | 222.6812             | 274.7588                    |                             |                             |                             |                             |                             |           |
| 56464           | 72255  | 177                        | down       | ing         | NR_036462  | rlapping<br>exon     | CORT                  | 155            | 7957                        | 6.631547              | 7.633867              | 94.22128             | 4                    | 9                    | 8                    | 4                    | 5                           | 6.842588                    | 6.1327                      | 6.9193544                   | 7.687953                    | 7.510281                    | 7.703366  |
| 0.0177          | 0.0440 | 2.0032                     |            | noncod      |            | sense-ove            | APITD1-               | 86.840         | 241.46                      |                       |                       |                      | 54.74469             | 111.5544             | 226.9637             | 222.6812             | 274.7588                    |                             |                             |                             |                             |                             |           |
| 56464           | 72255  | 177                        | down       | ing         | NR_036462  | rlapping<br>exon     | CORT                  | 155            | 7957                        | 6.631547              | 7.633867              | 94.22128             | 4                    | 9                    | 8                    | 4                    | 5                           | 6.842588                    | 6.1327                      | 6.9193544                   | 7.687953                    | 7.510281                    | 7.703366  |
| 0.0177          | 0.0440 | 2.0032                     |            | noncod      |            | sense-ove            | APITD1-               | 86.840         | 241.46                      |                       |                       |                      | 54.74469             | 111.5544             | 226.9637             | 222.6812             | 274.7588                    |                             |                             |                             |                             |                             |           |
| 56464           | 72255  | 177                        | down       | ing         | NR_036462  | rlapping<br>exon     | CORT                  | 155            | 7957                        | 6.631547              | 7.633867              | 94.22128             | 4                    | 9                    | 8                    | 4                    | 5                           | 6.842588                    | 6.1327                      | 6.9193544                   | 7.687953                    | 7.510281                    | 7.703366  |
| 0.0177          | 0.0440 | 2.0032                     |            | noncod      |            | sense-ove            | APITD1-               | 86.840         | 241.46                      |                       |                       |                      | 54.74469             | 111.5544             | 226.9637             | 222.6812             | 274.7588                    |                             |                             |                             |                             |                             |           |
| 56464           | 72255  | 177                        | down       | ing         | NR_036462  | rlapping<br>exon     | APITD1                | 155            | 7957                        | 6.631547              | 7.633867              | 94.22128             | 4                    | 9                    | 8                    | 4                    | 5                           | 6.842588                    | 6.1327                      | 6.9193544                   | 7.687953                    | 7.510281                    | 7.703366  |
| 2.5590          | 0.0003 | 2.3660                     |            | noncod      |            | sense-ove            |                       | 23.002         | 76.574                      |                       |                       | 22.65916             | 21.82514             |                      |                      | 79.35078             |                             |                             |                             |                             |                             |                             |           |
| 6E-06           | 67353  | 326                        | down       | ing         | NR_046236  | rlapping<br>exon     | CMPK2                 | 863            | 708                         | 4.759054              | 6.001524              | 4                    | 6                    | 24.52428             | 68.11146             | 4                    | 82.26188                    | 4.7718234                   | 4.7772913                   | 4.728046                    | 5.977593                    | 6.0567675                   | 5.97021   |
| 2.5590          | 0.0003 | 2.3660                     |            | noncod      |            | sense-ove            |                       | 23.002         | 76.574                      |                       |                       | 22.65916             | 21.82514             |                      |                      | 79.35078             |                             |                             |                             |                             |                             |                             |           |
| 6E-06           | 67353  | 326                        | down       | ing         | NR_046236  | rlapping<br>exon     | CMPK2                 | 863            | 708                         | 4.759054              | 6.001524              | 4                    | 6                    | 24.52428             | 68.11146             | 4                    | 82.26188                    | 4.7718234                   | 4.7772913                   | 4.728046                    | 5.977593                    | 6.0567675                   | 5.97021   |
| 2.5590          | 0.0003 | 2.3660                     |            | noncod      |            | sense-ove            |                       | 23.002         | 76.574                      |                       |                       | 22.65916             | 21.82514             |                      |                      | 79.35078             |                             |                             |                             |                             |                             |                             |           |
| 6E-06           | 67353  | 326                        | down       | ing         | NR_046236  | rlapping<br>exon     | CMPK2                 | 863            | 708                         | 4.759054              | 6.001524              | 4                    | 6                    | 24.52428             | 68.11146             | 4                    | 82.26188                    | 4.7718234                   | 4.7772913                   | 4.728046                    | 5.977593                    | 6.0567675                   | 5.97021   |
| 0.0392          | 0.0805 | 2.3796                     |            | noncod      |            |                      |                       | 6.9777         | 21.730                      |                       |                       | 4.999999             |                      | 6.705812             | 25.20876             |                      | 17.93993                    |                             |                             |                             |                             |                             |           |
| 89809           | 00531  | 085                        | down       | ing         | CR744969   | intergenic           |                       | 45             | 648                         | 2.934401              | 4.185126              | 5                    | 9.227424             | 5                    | 1                    | 22.04325             | 2                           | 2.3494408                   | 3.5104606                   | 2.9433026                   | 4.5792                      | 4.2373905                   | 3.7387862 |
| 0.0358          | 0.0751 | 2.2404                     | down       | noncod      | ENST0000   | natural              | MRPS2                 | 9.8432         | 28.744                      | 3.432464              | 4.596229              | 10.39105             | 5.576054             | 13.56254             | 31.02889             | 23.66726             | 31.53608                    | 3.6396437                   | 2.7670274                   | 3.8907197                   | 4.8733153                   | 4.337325                    | 4.5780473 |









|        |        |        |      |        |            |            |        |        |        |          |          |          |          |          |          |          |          |           |           |           |           |           |           |  |
|--------|--------|--------|------|--------|------------|------------|--------|--------|--------|----------|----------|----------|----------|----------|----------|----------|----------|-----------|-----------|-----------|-----------|-----------|-----------|--|
| 3.9188 | 0.0009 | 3.9697 |      | noncod |            | intronic   |        | 52.738 | 303.36 |          |          | 53.52718 | 51.40325 |          |          | 336.5515 |          |           |           |           |           |           |           |  |
| E-05   | 3994   | 664    | down | ing    | NR_033897  | antisense  | EPHA1  | 494    | 7457   | 5.970563 | 7.959617 | 53.28504 | 7        | 5        | 285.2255 | 288.3253 | 7        | 6.021994  | 6.0989413 | 5.7907543 | 8.009592  | 7.8799334 | 7.9893265 |  |
| 9.8940 | 0.0003 | 3.6476 |      | noncod | ENST0000   | intronic   |        | 7.2307 | 36.916 |          |          | 6.698681 |          |          |          | 41.86835 |          |           |           |           |           |           |           |  |
| 7E-07  | 32251  | 246    | down | ing    | 0583250    | antisense  | EFCAB5 | 91     | 128    | 3.095217 | 4.962174 | 7.102574 | 4        | 7.891119 | 32.10752 | 36.77251 | 5        | 3.0906076 | 3.044423  | 3.150621  | 4.9216094 | 4.968952  | 4.995962  |  |
| 9.8940 | 0.0003 | 3.6476 |      | noncod | ENST0000   | natural    |        | 7.2307 | 36.916 |          |          | 6.698681 |          |          |          | 41.86835 |          |           |           |           |           |           |           |  |
| 7E-07  | 32251  | 246    | down | ing    | 0583250    | antisense  | EFCAB5 | 91     | 128    | 3.095217 | 4.962174 | 7.102574 | 4        | 7.891119 | 32.10752 | 36.77251 | 5        | 3.0906076 | 3.044423  | 3.150621  | 4.9216094 | 4.968952  | 4.995962  |  |
| 0.0006 | 0.0043 | 2.3166 |      | noncod |            |            |        | 8.2531 | 26.698 |          |          | 7.390439 |          |          | 21.96019 |          |          |           |           |           |           |           |           |  |
| 56517  | 30983  | 509    | down | ing    | uc004adp.4 | intergenic |        | 89     | 092    | 3.275525 | 4.487566 | 8.019195 | 5        | 9.349932 | 6        | 30.7821  | 27.35198 | 3.2599874 | 3.186904  | 3.3796837 | 4.3840394 | 4.7132564 | 4.3654013 |  |
| 8.5435 | 0.0003 | 3.4332 |      | noncod | ENST0000   |            |        | 107.82 | 549.97 |          |          | 102.1837 | 116.9670 | 498.1540 | 533.3426 | 618.4280 |          |           |           |           |           |           |           |  |
| 6E-07  | 32251  | 17     | down | ing    | 0451149    | intergenic |        | 4443   | 4923   | 7.011928 | 8.791489 | 104.3226 | 2        | 1        | 8        | 5        | 4        | 6.993974  | 7.0495014 | 6.99231   | 8.7924595 | 8.740712  | 8.841297  |  |
|        |        |        |      |        |            | exon       |        |        |        |          |          |          |          |          |          |          |          |           |           |           |           |           |           |  |
| 0.0001 | 0.0017 | 2.0039 |      | noncod | ENST0000   | sense-ove  |        | 40.487 | 115.05 |          |          | 41.49882 |          |          | 98.33926 | 112.0404 | 134.7761 |           |           |           |           |           |           |  |
| 38102  | 08048  | 234    | down | ing    | 0433131    | rlapping   | HEATR1 | 538    | 1935   | 5.579054 | 6.581882 | 5        | 36.02731 | 43.93648 | 4        | 3        | 1        | 5.6554174 | 5.522148  | 5.559597  | 6.500326  | 6.551972  | 6.6933465 |  |
| 0.0001 | 0.0017 | 2.0039 |      | noncod | ENST0000   | natural    |        | 40.487 | 115.05 |          |          | 41.49882 |          |          | 98.33926 | 112.0404 | 134.7761 |           |           |           |           |           |           |  |
| 38102  | 08048  | 234    | down | ing    | 0433131    | antisense  | LGALS8 | 538    | 1935   | 5.579054 | 6.581882 | 5        | 36.02731 | 43.93648 | 4        | 3        | 1        | 5.6554174 | 5.522148  | 5.559597  | 6.500326  | 6.551972  | 6.6933465 |  |
| 0.0001 | 0.0017 | 2.0039 |      | noncod | ENST0000   | natural    |        | 40.487 | 115.05 |          |          | 41.49882 |          |          | 98.33926 | 112.0404 | 134.7761 |           |           |           |           |           |           |  |
| 38102  | 08048  | 234    | down | ing    | 0433131    | antisense  | LGALS8 | 538    | 1935   | 5.579054 | 6.581882 | 5        | 36.02731 | 43.93648 | 4        | 3        | 1        | 5.6554174 | 5.522148  | 5.559597  | 6.500326  | 6.551972  | 6.6933465 |  |
| 0.0001 | 0.0017 | 2.0039 |      | noncod | ENST0000   | natural    |        | 40.487 | 115.05 |          |          | 41.49882 |          |          | 98.33926 | 112.0404 | 134.7761 |           |           |           |           |           |           |  |
| 38102  | 08048  | 234    | down | ing    | 0433131    | antisense  | LGALS8 | 538    | 1935   | 5.579054 | 6.581882 | 5        | 36.02731 | 43.93648 | 4        | 3        | 1        | 5.6554174 | 5.522148  | 5.559597  | 6.500326  | 6.551972  | 6.6933465 |  |
| 0.0001 | 0.0017 | 2.0039 |      | noncod | ENST0000   | natural    |        | 40.487 | 115.05 |          |          | 41.49882 |          |          | 98.33926 | 112.0404 | 134.7761 |           |           |           |           |           |           |  |
| 38102  | 08048  | 234    | down | ing    | 0433131    | antisense  | LGALS8 | 538    | 1935   | 5.579054 | 6.581882 | 5        | 36.02731 | 43.93648 | 4        | 3        | 1        | 5.6554174 | 5.522148  | 5.559597  | 6.500326  | 6.551972  | 6.6933465 |  |
| 0.0004 | 0.0034 | 2.0796 |      | noncod | TCONS_00   |            |        | 74.842 | 224.48 |          |          | 63.57900 |          |          | 181.8180 | 250.9039 |          |           |           |           |           |           |           |  |
| 50973  | 59524  | 948    | down | ing    | 019201     | intergenic |        | 151    | 5013   | 6.464659 | 7.521031 | 72.75472 | 2        | 88.19273 | 2        | 240.7331 | 2        | 6.465887  | 6.3548903 | 6.5731997 | 7.3688235 | 7.621515  | 7.572754  |  |
| 7.0169 | 0.0001 | 3.5103 |      | noncod |            | natural    | TNFRSF | 84.072 | 429.23 |          |          |          |          |          |          | 463.0993 |          |           |           |           |           |           |           |  |
| 4E-08  | 15486  | 579    | down | ing    | NR_037844  | antisense  | 14     | 007    | 0477   | 6.64075  | 8.452368 | 83.73657 | 76.61976 | 91.85969 | 395.0498 | 429.5423 | 3        | 6.6701026 | 6.620752  | 6.631396  | 8.475148  | 8.439768  | 8.442189  |  |
| 0.0047 | 0.0165 | 4.2404 |      | noncod | ENST0000   |            |        | 6.2703 | 32.903 |          |          | 4.999999 |          |          | 4.999999 | 28.77158 | 35.62569 |           |           |           |           |           |           |  |
| 44934  | 10145  | 646    | down | ing    | 0447389    | intergenic |        | 64     | 204    | 2.71369  | 4.797913 | 5        | 8.811092 | 5        | 7        | 34.31233 | 4        | 2.3494408 | 3.4437895 | 2.3478405 | 4.7627616 | 4.8735237 | 4.7574525 |  |
| 3.1317 | 0.0008 | 2.2227 |      | noncod | TCONS_00   |            |        | 243.30 | 827.33 |          |          | 228.3984 | 229.8042 | 271.7077 |          |          |          |           |           |           |           |           |           |  |
| 4E-05  | 59046  | 135    | down | ing    | 001989     | intergenic |        | 348    | 6467   | 8.214331 | 9.366653 | 7        | 4        | 3        | 797.5721 | 794.2895 | 890.1478 | 8.152609  | 8.259376  | 8.231007  | 9.448804  | 9.293162  | 9.357992  |  |
| 9.9276 | 0.0003 | 3.1470 |      | noncod |            | natural    | RNASEH | 44.141 | 200.42 |          |          |          |          |          | 47.56395 | 174.6853 | 208.2583 |           |           |           |           |           |           |  |
| 2E-07  | 32251  | 486    | down | ing    | uc021vdo.1 | antisense  | 1      | 622    | 7517   | 5.710132 | 7.364131 | 43.69465 | 41.16626 | 7        | 2        | 3        | 218.3389 | 5.733557  | 5.718646  | 5.6781926 | 7.311791  | 7.4119263 | 7.3686767 |  |
|        |        |        |      |        |            | intron     |        |        |        |          |          |          |          |          |          |          |          |           |           |           |           |           |           |  |
| 0.0357 | 0.0749 | 3.6668 |      | noncod | ENST0000   | sense-ove  |        | 9.2250 | 38.741 |          |          | 5.692446 | 4.999999 |          | 24.54413 | 47.73418 |          |           |           |           |           |           |           |  |
| 23567  | 90684  | 762    | down | ing    | 0416076    | rlapping   | VCL    | 22     | 413    | 3.108345 | 4.982896 | 7        | 5        | 16.98262 | 2        | 43.94592 | 8        | 2.7693734 | 2.3528795 | 4.2027817 | 4.543318  | 5.2198253 | 5.185546  |  |
|        |        |        |      |        |            | intron     |        |        |        |          |          |          |          |          |          |          |          |           |           |           |           |           |           |  |
| 0.0357 | 0.0749 | 3.6668 |      | noncod | ENST0000   | sense-ove  |        | 9.2250 | 38.741 |          |          | 5.692446 | 4.999999 |          | 24.54413 | 47.73418 |          |           |           |           |           |           |           |  |
| 23567  | 90684  | 762    | down | ing    | 0416076    | rlapping   | VCL    | 22     | 413    | 3.108345 | 4.982896 | 7        | 5        | 16.98262 | 2        | 43.94592 | 8        | 2.7693734 | 2.3528795 | 4.2027817 | 4.543318  | 5.2198253 | 5.185546  |  |
|        |        |        |      |        |            | exon       |        |        |        |          |          |          |          |          |          |          |          |           |           |           |           |           |           |  |
| 0.0014 | 0.0070 | 2.5188 |      | noncod |            | sense-ove  |        | 44.661 | 158.47 |          |          | 53.24257 |          |          | 46.47352 | 139.2242 | 178.0018 |           |           |           |           |           |           |  |
| 25562  | 8064   | 676    | down | ing    | NR_034039  | rlapping   | SORD   | 394    | 0273   | 5.704206 | 7.036981 | 7        | 34.26808 | 6        | 6        | 158.1847 | 6        | 6.0206165 | 5.448952  | 5.643049  | 6.9951267 | 7.0305033 | 7.0853133 |  |
| 1.3019 | 0.0006 | 3.2584 |      | noncod |            |            |        | 7.1447 | 32.729 |          |          | 7.339312 |          |          |          |          |          |           |           |           |           |           |           |  |
| 4E-05  | 13906  | 682    | down | ing    | NR_038378  | intergenic |        | 98     | 503    | 3.08386  | 4.788054 | 6        | 6.695949 | 7.399131 | 28.59355 | 35.17081 | 34.42415 | 3.1377585 | 3.0435169 | 3.0703037 | 4.7528553 | 4.9036856 | 4.70762   |  |
| 0.0011 | 0.0060 | 2.6189 |      | noncod |            | bidirectio |        | 40.857 | 150.33 |          |          | 32.17753 |          |          | 46.49368 | 141.6233 | 138.4482 | 170.9301  |           |           |           |           |           |  |
| 32761  | 76647  | 475    | down | ing    | uc002iil.3 | nal        | FMNL1  | 285    | 391    | 5.577673 | 6.96666  | 2        | 43.90064 | 3        | 7        | 1        | 5        | 5.2797375 | 5.8093057 | 5.643976  | 7.018398  | 6.851829  | 7.0297537 |  |
| 0.0019 | 0.0089 | 2.1265 |      | noncod | ENST0000   |            |        | 41.559 | 124.01 |          |          | 39.95480 | 32.39145 | 52.33172 | 100.0423 | 142.7879 |          |           |           |           |           |           |           |  |
| 94421  | 32953  | 628    | down | ing    | 0545923    | intergenic |        | 329    | 3455   | 5.594414 | 6.682938 | 7        | 7        | 2        | 05       | 129.2101 | 6        | 5.601924  | 5.3657794 | 5.81554   | 6.526972  | 6.7498198 | 6.772022  |  |
| 0.0001 | 0.0018 | 4.0883 |      | noncod | ENST0000   | intronic   |        | 23.899 | 135.33 |          |          |          |          |          | 30.29327 | 130.7359 | 128.8787 | 146.4045  |           |           |           |           |           |  |
| 55466  | 2573   | 023    | down | ing    | 0411949    | antisense  | NAB1   | 911    | 9757   | 4.786819 | 6.818321 | 19.5316  | 21.87486 | 4        | 3        | 8        | 6        | 4.5481987 | 4.7817445 | 5.0305147 | 6.899744  | 6.74662   | 6.8085995 |  |
|        |        |        |      |        |            | intron     |        |        |        |          |          |          |          |          |          |          |          |           |           |           |           |           |           |  |
| 0.0001 | 0.0016 | 2.1448 |      | noncod |            | sense-ove  |        | 103.50 | 321.53 |          |          | 103.5166 |          |          | 121.2528 | 291.2723 | 349.2617 |           |           |           |           |           |           |  |
| 34471  | 81257  | 997    | down | ing    | uc001zhh.2 | rlapping   | SCG5   | 1673   | 154    | 6.939887 | 8.040797 | 8        | 85.73552 | 2        | 4        | 324.0605 | 8        | 6.981347  | 6.791881  | 7.0464334 | 8.041466  | 8.040053  | 8.040873  |  |
|        |        |        |      |        |            | intron     |        |        |        |          |          |          |          |          |          |          |          |           |           |           |           |           |           |  |
| 0.0001 | 0.0016 | 2.1448 |      | noncod |            | sense-ove  |        | 103.50 | 321.53 |          |          | 103.5166 |          |          | 121.2528 | 291.2723 | 349.2617 |           |           |           |           |           |           |  |
| 34471  | 81257  | 997    | down | ing    | uc001zhh.2 | rlapping   | SCG5   | 1673   | 154    | 6.939887 | 8.040797 | 8        | 85.73552 | 2        | 4        | 324.0605 | 8        | 6.981347  | 6.791881  | 7.0464334 | 8.041466  | 8.040053  | 8.040873  |  |
| 0.0033 | 0.0128 | 2.4901 |      | noncod | ENST0000   |            |        | 19.449 | 66.612 |          |          | 24.41247 |          |          | 19.37664 | 59.53627 | 70.95759 | 69.34389  |           |           |           |           |           |  |
| 33086  | 06241  | 118    | down | ing    | 0573220    | intergenic |        | 224    | 59     | 4.485813 | 5.802024 | 6        | 14.55855 | 6        | 8        | 6        | 5        | 4.8770204 | 4.1868896 | 4.39353   | 5.785018  | 5.8953586 | 5.725695  |  |
| 0.0054 | 0.0181 | 3.9334 |      | noncod |            | natural    |        | 11.164 | 56.620 |          |          | 10.70619 |          |          | 16.52639 | 50.59296 | 58.92474 |           |           |           |           |           |           |  |
| 03441  | 1889   | 981    | down | ing    | NR_040093  | antisense  | NREP   | 94     | 759    | 3.595554 | 5.571367 | 9        | 6.262227 | 4        | 4        | 60.34457 | 4        | 3.6861372 | 2.937103  | 4.1634226 | 5.557795  | 5.667175  | 5.4891315 |  |
| 0.0054 | 0.0181 | 3.9334 |      | noncod |            | natural    |        | 11.164 | 56.620 |          |          | 10.70619 |          |          | 16.52639 | 50.59296 | 58.92474 |           |           |           |           |           |           |  |
| 03441  | 1889   | 981    | down | ing    | NR_040093  | antisense  | NREP   | 94     | 759    | 3.595554 | 5.571367 | 9        | 6.262227 | 4        | 4        | 60.34457 | 4        | 3.6861372 | 2.937103  | 4.1634226 | 5.557795  | 5.667175  | 5.4891315 |  |
| 0.0054 | 0.0181 | 3.9334 |      | noncod |            | natural    |        | 11.164 | 56.620 |          |          | 10.70619 |          |          | 16.52639 | 50.59296 | 58.92474 |           |           |           |           |           |           |  |
| 03441  | 1889   | 981    | down | ing    | NR_040093  | antisense  | NREP   | 94     | 759    | 3.595554 | 5.571367 |          |          |          |          |          |          |           |           |           |           |           |           |  |

|        |        |        |      |        |            |            |         |        |        |          |          |          |          |          |          |          |          |           |           |           |           |           |           |
|--------|--------|--------|------|--------|------------|------------|---------|--------|--------|----------|----------|----------|----------|----------|----------|----------|----------|-----------|-----------|-----------|-----------|-----------|-----------|
| 03441  | 1889   | 981    |      | ing    |            | antisense  |         | 94     | 759    |          |          | 9        |          | 4        | 4        |          |          | 4         |           |           |           |           |           |
| 0.0054 | 0.0181 | 3.9334 |      | noncod |            | natural    |         | 11.164 | 56.620 |          |          | 10.70619 |          | 16.52639 | 50.59296 |          |          | 58.92474  |           |           |           |           |           |
| 03441  | 1889   | 981    | down | ing    | NR_040093  | antisense  | NREP    | 94     | 759    | 3.595554 | 5.571367 | 9        | 6.262227 | 4        | 4        | 60.34457 | 4        | 3.6861372 | 2.937103  | 4.1634226 | 5.557795  | 5.667175  | 5.4891315 |
| 0.0054 | 0.0181 | 3.9334 |      | noncod |            | natural    |         | 11.164 | 56.620 |          |          | 10.70619 |          | 16.52639 | 50.59296 |          |          | 58.92474  |           |           |           |           |           |
| 03441  | 1889   | 981    | down | ing    | NR_040093  | antisense  | NREP    | 94     | 759    | 3.595554 | 5.571367 | 9        | 6.262227 | 4        | 4        | 60.34457 | 4        | 3.6861372 | 2.937103  | 4.1634226 | 5.557795  | 5.667175  | 5.4891315 |
| 0.0054 | 0.0181 | 3.9334 |      | noncod |            | natural    |         | 11.164 | 56.620 |          |          | 10.70619 |          | 16.52639 | 50.59296 |          |          | 58.92474  |           |           |           |           |           |
| 03441  | 1889   | 981    | down | ing    | NR_040093  | antisense  | NREP    | 94     | 759    | 3.595554 | 5.571367 | 9        | 6.262227 | 4        | 4        | 60.34457 | 4        | 3.6861372 | 2.937103  | 4.1634226 | 5.557795  | 5.667175  | 5.4891315 |
| 0.0054 | 0.0181 | 3.9334 |      | noncod |            | natural    |         | 11.164 | 56.620 |          |          | 10.70619 |          | 16.52639 | 50.59296 |          |          | 58.92474  |           |           |           |           |           |
| 03441  | 1889   | 981    | down | ing    | NR_040093  | antisense  | NREP    | 94     | 759    | 3.595554 | 5.571367 | 9        | 6.262227 | 4        | 4        | 60.34457 | 4        | 3.6861372 | 2.937103  | 4.1634226 | 5.557795  | 5.667175  | 5.4891315 |
| 0.0054 | 0.0181 | 3.9334 |      | noncod |            | natural    |         | 11.164 | 56.620 |          |          | 10.70619 |          | 16.52639 | 50.59296 |          |          | 58.92474  |           |           |           |           |           |
| 03441  | 1889   | 981    | down | ing    | NR_040093  | antisense  | NREP    | 94     | 759    | 3.595554 | 5.571367 | 9        | 6.262227 | 4        | 4        | 60.34457 | 4        | 3.6861372 | 2.937103  | 4.1634226 | 5.557795  | 5.667175  | 5.4891315 |
| 0.0054 | 0.0181 | 3.9334 |      | noncod |            | natural    |         | 11.164 | 56.620 |          |          | 10.70619 |          | 16.52639 | 50.59296 |          |          | 58.92474  |           |           |           |           |           |
| 03441  | 1889   | 981    | down | ing    | NR_040093  | antisense  | STARD4  | 94     | 759    | 3.595554 | 5.571367 | 9        | 6.262227 | 4        | 4        | 60.34457 | 4        | 3.6861372 | 2.937103  | 4.1634226 | 5.557795  | 5.667175  | 5.4891315 |
| 0.0017 | 0.0081 | 2.2812 |      | noncod | ENST0000   | natural    |         | 21.570 | 67.142 |          |          | 18.98577 |          | 28.36309 | 62.06432 |          |          |           |           |           |           |           |           |
| 50483  | 40443  | 897    | down | ing    | 0422153    | antisense  | RFX5    | 278    | 191    | 4.626523 | 5.816373 | 1        | 17.36197 | 4        | 3        | 70.21018 | 69.15207 | 4.5055556 | 4.444511  | 4.9295034 | 5.844524  | 5.883112  | 5.721483  |
| 0.0017 | 0.0081 | 2.2812 |      | noncod | ENST0000   | natural    |         | 21.570 | 67.142 |          |          | 18.98577 |          | 28.36309 | 62.06432 |          |          |           |           |           |           |           |           |
| 50483  | 40443  | 897    | down | ing    | 0422153    | antisense  | RFX5    | 278    | 191    | 4.626523 | 5.816373 | 1        | 17.36197 | 4        | 3        | 70.21018 | 69.15207 | 4.5055556 | 4.444511  | 4.9295034 | 5.844524  | 5.883112  | 5.721483  |
| 4.2790 | 0.0009 | 3.7695 |      | noncod | ENST0000   | intronic   |         | 22.933 |        |          |          | 4.999999 | 4.999999 | 4.999999 | 19.67062 | 20.21757 | 28.91372 |           |           |           |           |           |           |
| 8E-05  | 67147  | 285    | down | ing    | 0556874    | antisense  | GPHN    | 5      | 975    | 2.350054 | 4.264438 | 5        | 5        | 5        | 4        | 7        | 3        | 2.3494408 | 2.3528795 | 2.3478405 | 4.231636  | 4.111099  | 4.450578  |
| 4.2790 | 0.0009 | 3.7695 |      | noncod | ENST0000   | intronic   |         | 22.933 |        |          |          | 4.999999 | 4.999999 | 4.999999 | 19.67062 | 20.21757 | 28.91372 |           |           |           |           |           |           |
| 8E-05  | 67147  | 285    | down | ing    | 0556874    | antisense  | GPHN    | 5      | 975    | 2.350054 | 4.264438 | 5        | 5        | 5        | 4        | 7        | 3        | 2.3494408 | 2.3528795 | 2.3478405 | 4.231636  | 4.111099  | 4.450578  |
| 0.0016 | 0.0078 | 2.1546 |      | noncod | ENST0000   |            |         | 18.304 | 54.653 |          |          | 15.35758 | 17.94630 | 21.60894 | 56.90236 | 49.61345 |          |           |           |           |           |           |           |
| 52941  | 11303  | 996    | down | ing    | 0563377    |            |         | 279    | 075    | 4.416253 | 5.52374  | 9        | 6        | 2        | 3        | 3        | 57.44341 | 4.2069507 | 4.4933023 | 4.5485067 | 5.7241783 | 5.393774  | 5.4532676 |
| 0.0006 | 0.0044 | 3.3616 |      | noncod | ENST0000   | intronic   |         | 11.551 | 53.101 |          |          | 13.12810 |          | 13.10443 | 48.31978 | 54.51217 | 56.47266 |           |           |           |           |           |           |
| 75983  | 05718  | 468    | down | ing    | 0454380    | antisense  | C5orf56 | 341    | 541    | 3.733981 | 5.483149 | 9        | 8.421474 | 9        | 2        | 3        | 8        | 3.9783065 | 3.3801665 | 3.84347   | 5.4907575 | 5.529472  | 5.429218  |
| 0.0006 | 0.0044 | 3.3616 |      | noncod | ENST0000   | intronic   |         | 11.551 | 53.101 |          |          | 13.12810 |          | 13.10443 | 48.31978 | 54.51217 | 56.47266 |           |           |           |           |           |           |
| 75983  | 05718  | 468    | down | ing    | 0454380    | antisense  | C5orf56 | 341    | 541    | 3.733981 | 5.483149 | 9        | 8.421474 | 9        | 2        | 3        | 8        | 3.9783065 | 3.3801665 | 3.84347   | 5.4907575 | 5.529472  | 5.429218  |
| 0.0006 | 0.0044 | 3.3616 |      | noncod | ENST0000   | intronic   |         | 11.551 | 53.101 |          |          | 13.12810 |          | 13.10443 | 48.31978 | 54.51217 | 56.47266 |           |           |           |           |           |           |
| 75983  | 05718  | 468    | down | ing    | 0454380    | antisense  | C5orf56 | 341    | 541    | 3.733981 | 5.483149 | 9        | 8.421474 | 9        | 2        | 3        | 8        | 3.9783065 | 3.3801665 | 3.84347   | 5.4907575 | 5.529472  | 5.429218  |
| 0.0006 | 0.0044 | 3.3616 |      | noncod | ENST0000   | intronic   |         | 11.551 | 53.101 |          |          | 13.12810 |          | 13.10443 | 48.31978 | 54.51217 | 56.47266 |           |           |           |           |           |           |
| 75983  | 05718  | 468    | down | ing    | 0454380    | antisense  | C5orf56 | 341    | 541    | 3.733981 | 5.483149 | 9        | 8.421474 | 9        | 2        | 3        | 8        | 3.9783065 | 3.3801665 | 3.84347   | 5.4907575 | 5.529472  | 5.429218  |
| 5.4008 | 0.0004 | 3.6296 |      | noncod | TCONS_00   |            |         | 89.885 | 477.22 |          |          |          | 77.55453 | 100.3999 | 417.5123 |          |          |           |           |           |           |           |           |
| 7E-06  | 45438  | 224    | down | ing    | 008952     | intergenic |         | 55     | 7853   | 6.735097 | 8.594917 | 91.70219 | 5        | 25       | 6        | 499.1222 | 515.049  | 6.804621  | 6.639413  | 6.7612576 | 8.545616  | 8.646338  | 8.592796  |
| 0.0044 | 0.0158 | 2.8318 |      | noncod | ENST0000   | natural    | SLC25A1 | 8.0829 | 31.382 |          |          |          |          |          | 25.53610 | 30.63584 | 37.97614 |           |           |           |           |           |           |
| 90951  | 67327  | 261    | down | ing    | 0443935    | antisense  | 8       | 46     | 698    | 3.21516  | 4.716893 | 5.563613 | 9.596536 | 9.088689 | 6        | 1        | 7        | 2.7320914 | 3.5703702 | 3.3430183 | 4.5982323 | 4.705322  | 4.8471236 |
| 0.0127 | 0.0343 | 2.0319 |      | noncod |            | sense-ove  |         | 8.7341 | 24.908 |          |          |          |          |          | 26.87909 | 26.81891 |          |           |           |           |           |           |           |
| 14035  | 39084  | 406    | down | ing    | NR_036633  | rlapping   | VAPB    | 47     | 847    | 3.363273 | 4.386131 | 9.901275 | 8.156075 | 8.145091 | 3        | 8        | 21.02853 | 3.5661576 | 3.3295407 | 3.1941197 | 4.6699457 | 4.5170274 | 3.9714196 |
| 0.0127 | 0.0343 | 2.0319 |      | noncod |            | sense-ove  |         | 8.7341 | 24.908 |          |          |          |          |          | 26.87909 | 26.81891 |          |           |           |           |           |           |           |
| 14035  | 39084  | 406    | down | ing    | NR_036633  | rlapping   | VAPB    | 47     | 847    | 3.363273 | 4.386131 | 9.901275 | 8.156075 | 8.145091 | 3        | 8        | 21.02853 | 3.5661576 | 3.3295407 | 3.1941197 | 4.6699457 | 4.5170274 | 3.9714196 |
| 0.0007 | 0.0046 | 4.8293 |      | noncod | ENST0000   |            |         | 5.5678 | 34.433 |          |          | 4.999999 |          | 4.999999 |          | 33.66362 | 41.51729 |           |           |           |           |           |           |
| 29558  | 18154  | 167    | down | ing    | 0452402    | intergenic |         | 49     | 773    | 2.580887 | 4.852706 | 5        | 6.703549 | 5        | 28.1204  | 8        | 2        | 2.3494408 | 3.0453799 | 2.3478405 | 4.7329044 | 4.8444076 | 4.9808064 |
| 0.0004 | 0.0032 | 2.0014 |      | noncod | ENST0000   | bidirectio | ERCC6L  | 98.954 | 287.03 |          |          | 104.3028 |          | 110.3303 | 244.8017 | 307.0070 | 309.2998 |           |           |           |           |           |           |
| 00768  | 16094  | 85     | down | ing    | 0427259    | nal        | 2       | 507    | 6217   | 6.875658 | 7.876729 | 1        | 82.23035 | 6        | 6        | 2        | 7        | 6.993661  | 6.7299    | 6.903414  | 7.797011  | 7.966799  | 7.8663774 |
| 0.0003 | 0.0031 | 5.8996 |      | noncod | ENST0000   |            |         | 9.8193 | 78.360 |          |          |          | 6.926466 |          |          | 83.69318 |          |           |           |           |           |           |           |
| 79063  | 01019  | 848    | down | ing    | 0436551    | intergenic |         | 76     | 835    | 3.471934 | 6.032572 | 9.126652 | 5        | 13.40501 | 69.03587 | 4        | 82.35345 | 3.444596  | 3.0944822 | 3.8767238 | 5.99771   | 6.128417  | 5.9715886 |
| 4.1091 | 0.0004 | 3.1108 |      | noncod | ENST0000   |            |         | 195.89 | 933.03 |          |          | 196.8106 | 171.0016 | 219.8828 |          | 1014.416 |          |           |           |           |           |           |           |
| 6E-06  | 1588   | 938    | down | ing    | 0442067    | intergenic |         | 8397   | 1433   | 7.887532 | 9.524862 | 7        | 3        | 9        | 810.8729 | 973.8045 | 9        | 7.9261885 | 7.8115125 | 7.924896  | 9.473179  | 9.5690365 | 9.532369  |
| 3.0824 | 0.0008 | 2.7553 |      | noncod | TCONS_00   | sense-ove  | RP11-73 | 36.800 | 143.08 |          |          | 32.60212 | 35.95380 | 41.84490 | 129.5316 |          | 154.4713 |           |           |           |           |           |           |
| 6E-05  | 55922  | 511    | down | ing    | 011946     | rlapping   | O6.4    | 279    | 0017   | 5.435716 | 6.897952 | 3        | 8        | 6        | 6        | 145.237  | 9        | 5.298253  | 5.5186825 | 5.490212  | 6.8879113 | 6.917085  | 6.8888597 |
| 0.0030 | 0.0118 | 2.1038 |      | noncod | ENST0000   | natural    |         | 11.618 | 33.853 |          |          |          |          |          | 29.98384 | 39.15006 | 32.42531 |           |           |           |           |           |           |
| 06837  | 62229  | 401    | down | ing    | 0547042    | antisense  | FKBP4   | 512    | 076    | 3.757699 | 4.830724 | 9.732487 | 11.27843 | 13.84462 | 9        | 3        | 6        | 3.5431156 | 3.8121052 | 3.9178748 | 4.8225117 | 5.049631  | 4.620028  |
| 2.5297 | 0.0007 | 2.4478 |      | noncod | ENST0000   | bidirectio |         | 107.04 | 382.74 |          |          |          |          | 125.4458 | 349.6921 | 373.5778 | 424.9532 |           |           |           |           |           |           |
| 8E-05  | 92371  | 965    | down | ing    | 0528692    | nal        | LRRRC8C | 6942   | 109    | 6.992967 | 8.28451  | 98.49023 | 97.20478 | 16       | 7        | 8        | 2        | 6.908799  | 6.9762917 | 7.0938106 | 8.289558  | 8.242472  | 8.321499  |
| 2.7305 | 0.0008 | 3.1108 |      | noncod | ENST0000   |            |         | 95.797 | 437.05 |          |          |          | 84.37775 | 110.9000 | 372.9489 | 479.3133 | 458.8955 |           |           |           |           |           |           |
| E-05   | 27901  | 285    | down | ing    | 0434661    | intergenic |         | 148    | 26     | 6.83038  | 8.467679 | 92.11361 | 4        | 8        | 4        | 2        | 4        | 6.8109407 | 6.769559  | 6.9106407 | 8.384217  | 8.591843  | 8.426977  |
| 0.0255 | 0.0581 | 2.2857 |      | noncod | ENST0000   |            |         | 28.149 | 86.427 |          |          | 16.70526 |          | 33.91219 |          |          |          |           |           |           |           |           |           |
| 04945  | 0262   | 95     | down | ing    | 0579301    | intergenic |         | 061    | 5      | 4.983742 | 6.176438 | 1        | 33.82973 | 3        | 82.49816 | 77.92195 | 98.86239 | 4.325797  | 5.429393  | 5.196035  | 6.25048   | 6.032934  | 6.245899  |
| 0.0057 | 0.0189 | 2.8697 |      | noncod |            | natural    |         | 10.159 | 38.815 |          |          | 11.87475 |          | 12.25204 | 37.22733 | 37.38753 | 41.83215 |           |           |           |           |           |           |
| 54004  | 79307  | 649    | down | ing    | uc010beg.1 | antisense  | SLC30A4 | 914    | 674    | 3.514855 | 5.035788 | 1        | 6.352941 | 9        | 3        | 5        | 3        | 3         |           |           |           |           |           |



























|        |        |        |      |        |           |            |         |        |        |          |          |          |          |          |          |          |          |           |           |           |           |           |           |  |  |
|--------|--------|--------|------|--------|-----------|------------|---------|--------|--------|----------|----------|----------|----------|----------|----------|----------|----------|-----------|-----------|-----------|-----------|-----------|-----------|--|--|
| 0.0024 | 0.0101 | 2.5343 |      | noncod | ENST0000  |            |         | 46.741 | 166.04 |          |          | 35.56189 |          |          | 170.0614 | 167.9241 | 160.1399 |           |           |           |           |           |           |  |  |
| 02371  | 52317  | 5      | down | ing    | 0567401   | intergenic | HEATR5  | 894    | 187    | 5.768282 | 7.109898 | 3        | 48.63437 | 56.02942 | 8        | 5        | 8        | 5.427608  | 5.96122   | 5.9160194 | 7.2740216 | 7.117118  | 6.9385552 |  |  |
| 0.0004 | 0.0032 | 2.5766 |      | noncod | ENST0000  | natural    |         | 26.369 | 94.373 |          |          | 26.22827 |          | 31.60089 | 94.86555 |          |          |           |           |           |           |           |           |  |  |
| 13182  | 80729  | 11     | down | ing    | 0551799   | antisense  | A       | 695    | 702    | 4.940243 | 6.305718 | 1        | 21.27992 | 5        | 5        | 90.56949 | 97.68606 | 4.9866333 | 4.741627  | 5.09247   | 6.448612  | 6.240159  | 6.2283835 |  |  |
| 0.0001 | 0.0020 | 2.4992 |      | noncod | ENST0000  | natural    |         | 46.889 | 167.37 |          |          | 50.83503 |          | 49.04449 | 154.8252 | 189.3204 |          |           |           |           |           |           |           |  |  |
| 88908  | 30877  | 17     | down | ing    | 0452431   | antisense  | PCBP1   | 461    | 0313   | 5.794417 | 7.115893 | 7        | 40.78885 | 5        | 157.9653 | 1        | 3        | 5.957259  | 5.7046013 | 5.7213893 | 7.170998  | 7.0004797 | 7.1762004 |  |  |
| 0.0001 | 0.0016 | 4.1452 |      | noncod | ENST0000  |            |         | 38.405 | 228.82 |          |          |          |          |          | 205.7202 | 213.5446 |          |           |           |           |           |           |           |  |  |
| 3612   | 97185  | 372    | down | ing    | 0567068   | intergenic |         | 043    | 3613   | 5.500356 | 7.55181  | 32.97234 | 41.91557 | 40.32722 | 1        | 3        | 267.206  | 5.315956  | 5.746097  | 5.4390135 | 7.543829  | 7.4463515 | 7.66525   |  |  |
| 4.4829 | 0.0009 | 2.8335 |      | noncod |           | sense-ove  |         | 42.242 | 171.71 |          |          | 42.64312 |          |          | 156.4322 | 162.3099 | 196.4042 |           |           |           |           |           |           |  |  |
| 8E-05  | 92889  | 67     | down | ing    | NR_033746 | rlapping   | DMKN    | 316    | 5497   | 5.647934 | 7.150553 | 7        | 41.44164 | 42.64218 | 8        | 4        | 7        | 5.694929  | 5.7290273 | 5.519846  | 7.1568694 | 7.069551  | 7.2252398 |  |  |
| 4.4829 | 0.0009 | 2.8335 |      | noncod |           | sense-ove  |         | 42.242 | 171.71 |          |          | 42.64312 |          |          | 156.4322 | 162.3099 | 196.4042 |           |           |           |           |           |           |  |  |
| 8E-05  | 92889  | 67     | down | ing    | NR_033746 | rlapping   | DMKN    | 316    | 5497   | 5.647934 | 7.150553 | 7        | 41.44164 | 42.64218 | 8        | 4        | 7        | 5.694929  | 5.7290273 | 5.519846  | 7.1568694 | 7.069551  | 7.2252398 |  |  |
| 4.4829 | 0.0009 | 2.8335 |      | noncod |           | sense-ove  |         | 42.242 | 171.71 |          |          | 42.64312 |          |          | 156.4322 | 162.3099 | 196.4042 |           |           |           |           |           |           |  |  |
| 8E-05  | 92889  | 67     | down | ing    | NR_033746 | rlapping   | DMKN    | 316    | 5497   | 5.647934 | 7.150553 | 7        | 41.44164 | 42.64218 | 8        | 4        | 7        | 5.694929  | 5.7290273 | 5.519846  | 7.1568694 | 7.069551  | 7.2252398 |  |  |
| 4.4829 | 0.0009 | 2.8335 |      | noncod |           | sense-ove  |         | 42.242 | 171.71 |          |          | 42.64312 |          |          | 156.4322 | 162.3099 | 196.4042 |           |           |           |           |           |           |  |  |
| 8E-05  | 92889  | 67     | down | ing    | NR_033746 | rlapping   | DMKN    | 316    | 5497   | 5.647934 | 7.150553 | 7        | 41.44164 | 42.64218 | 8        | 4        | 7        | 5.694929  | 5.7290273 | 5.519846  | 7.1568694 | 7.069551  | 7.2252398 |  |  |
| 4.4829 | 0.0009 | 2.8335 |      | noncod |           | sense-ove  |         | 42.242 | 171.71 |          |          | 42.64312 |          |          | 156.4322 | 162.3099 | 196.4042 |           |           |           |           |           |           |  |  |
| 8E-05  | 92889  | 67     | down | ing    | NR_033746 | rlapping   | DMKN    | 316    | 5497   | 5.647934 | 7.150553 | 7        | 41.44164 | 42.64218 | 8        | 4        | 7        | 5.694929  | 5.7290273 | 5.519846  | 7.1568694 | 7.069551  | 7.2252398 |  |  |
| 4.4829 | 0.0009 | 2.8335 |      | noncod |           | sense-ove  |         | 42.242 | 171.71 |          |          | 42.64312 |          |          | 156.4322 | 162.3099 | 196.4042 |           |           |           |           |           |           |  |  |
| 8E-05  | 92889  | 67     | down | ing    | NR_033746 | rlapping   | DMKN    | 316    | 5497   | 5.647934 | 7.150553 | 7        | 41.44164 | 42.64218 | 8        | 4        | 7        | 5.694929  | 5.7290273 | 5.519846  | 7.1568694 | 7.069551  | 7.2252398 |  |  |
| 4.4829 | 0.0009 | 2.8335 |      | noncod |           | sense-ove  |         | 42.242 | 171.71 |          |          | 42.64312 |          |          | 156.4322 | 162.3099 | 196.4042 |           |           |           |           |           |           |  |  |
| 8E-05  | 92889  | 67     | down | ing    | NR_033746 | rlapping   | DMKN    | 316    | 5497   | 5.647934 | 7.150553 | 7        | 41.44164 | 42.64218 | 8        | 4        | 7        | 5.694929  | 5.7290273 | 5.519846  | 7.1568694 | 7.069551  | 7.2252398 |  |  |
| 0.0395 | 0.0809 | 2.0523 |      | noncod | TCONS_00  |            |         | 13.778 | 37.086 |          |          |          |          | 19.79115 | 36.41490 | 31.74657 | 43.09710 |           |           |           |           |           |           |  |  |
| 69237  | 17368  | 716    | down | ing    | 018558    | intergenic |         | 808    | 197    | 3.926641 | 4.963933 | 8.269676 | 13.27559 | 9        | 6        | 8        | 7        | 3.3053422 | 4.0502133 | 4.424368  | 5.0908093 | 4.759735  | 5.041255  |  |  |
| 0.0049 | 0.0171 | 3.4588 |      | noncod | ENST0000  | natural    |         | 56.540 | 261.87 |          |          |          | 38.99296 |          | 235.9108 | 288.5317 | 261.1685 |           |           |           |           |           |           |  |  |
| 96121  | 20911  | 119    | down | ing    | 0425290   | antisense  | ADO     | 722    | 0393   | 5.962016 | 7.752293 | 41.68103 | 6        | 88.94817 | 9        | 7        | 2        | 5.6612396 | 5.639869  | 6.58494   | 7.7453327 | 7.8805456 | 7.631     |  |  |
| 0.0025 | 0.0106 | 3.5447 |      | noncod | ENST0000  | intronic   |         | 5.8861 | 25.750 |          |          | 4.999999 | 4.999999 |          | 19.88254 | 28.13669 | 29.23161 |           |           |           |           |           |           |  |  |
| 75632  | 75194  | 276    | down | ing    | 0422204   | antisense  | C5orf56 | 73     | 286    | 2.604979 | 4.430654 | 5        | 5        | 7.658519 | 2        | 8        | 7        | 2.3494408 | 2.3528795 | 3.112616  | 4.244882  | 4.5809593 | 4.4661193 |  |  |
| 0.0025 | 0.0106 | 3.5447 |      | noncod | ENST0000  | intronic   |         | 5.8861 | 25.750 |          |          | 4.999999 | 4.999999 |          | 19.88254 | 28.13669 | 29.23161 |           |           |           |           |           |           |  |  |
| 75632  | 75194  | 276    | down | ing    | 0422204   | antisense  | C5orf56 | 73     | 286    | 2.604979 | 4.430654 | 5        | 5        | 7.658519 | 2        | 8        | 7        | 2.3494408 | 2.3528795 | 3.112616  | 4.244882  | 4.5809593 | 4.4661193 |  |  |
| 0.0025 | 0.0106 | 3.5447 |      | noncod | ENST0000  | intronic   |         | 5.8861 | 25.750 |          |          | 4.999999 | 4.999999 |          | 19.88254 | 28.13669 | 29.23161 |           |           |           |           |           |           |  |  |
| 75632  | 75194  | 276    | down | ing    | 0422204   | antisense  | C5orf56 | 73     | 286    | 2.604979 | 4.430654 | 5        | 5        | 7.658519 | 2        | 8        | 7        | 2.3494408 | 2.3528795 | 3.112616  | 4.244882  | 4.5809593 | 4.4661193 |  |  |
| 0.0179 | 0.0443 | 2.6875 |      | noncod |           | natural    |         | 12.199 | 42.769 |          |          | 6.801275 |          | 16.73576 |          | 39.13875 | 46.97263 |           |           |           |           |           |           |  |  |
| 61698  | 99041  | 18     | down | ing    | NR_027334 | antisense  | MZF1    | 014    | 185    | 3.745077 | 5.171351 | 3        | 13.06    | 7        | 42.19617 | 2        | 3        | 3.028495  | 4.0259337 | 4.1808014 | 5.3011208 | 5.049034  | 5.1638985 |  |  |
| 0.0179 | 0.0443 | 2.6875 |      | noncod |           | natural    |         | 12.199 | 42.769 |          |          | 6.801275 |          | 16.73576 |          | 39.13875 | 46.97263 |           |           |           |           |           |           |  |  |
| 61698  | 99041  | 18     | down | ing    | NR_027334 | antisense  | MZF1    | 014    | 185    | 3.745077 | 5.171351 | 3        | 13.06    | 7        | 42.19617 | 2        | 3        | 3.028495  | 4.0259337 | 4.1808014 | 5.3011208 | 5.049034  | 5.1638985 |  |  |
| 0.0179 | 0.0443 | 2.6875 |      | noncod |           | natural    |         | 12.199 | 42.769 |          |          | 6.801275 |          | 16.73576 |          | 39.13875 | 46.97263 |           |           |           |           |           |           |  |  |
| 61698  | 99041  | 18     | down | ing    | NR_027334 | antisense  | MZF1    | 014    | 185    | 3.745077 | 5.171351 | 3        | 13.06    | 7        | 42.19617 | 2        | 3        | 3.028495  | 4.0259337 | 4.1808014 | 5.3011208 | 5.049034  | 5.1638985 |  |  |
| 0.0005 | 0.0037 | 2.6727 |      | noncod |           |            |         | 193.96 | 774.53 |          |          |          | 151.8393 | 246.7876 |          |          |          |           |           |           |           |           |           |  |  |
| 26024  | 91057  | 502    | down | ing    | NR_026885 | intergenic |         | 191    | 9267   | 7.850196 | 9.268521 | 183.2587 | 9        | 4        | 660.3851 | 811.3903 | 851.8424 | 7.824573  | 7.634449  | 8.091566  | 9.184458  | 9.327621  | 9.293484  |  |  |
| 0.0004 | 0.0035 | 7.2133 |      | noncod | ENST0000  | intronic   |         | 13.634 | 130.93 |          |          | 11.61304 |          |          | 126.9216 | 127.2108 |          |           |           |           |           |           |           |  |  |
| 63716  | 08194  | 504    | down | ing    | 0518880   | antisense  | FABP5   | 445    | 8027   | 3.923579 | 6.774249 | 1        | 9.349904 | 19.94039 | 9        | 9        | 138.6815 | 3.804884  | 3.530779  | 4.4350753 | 6.8619614 | 6.7289724 | 6.731813  |  |  |
| 0.0176 | 0.0438 | 2.0650 |      | noncod |           | natural    |         | 20.780 | 57.135 |          |          |          |          | 30.38160 |          | 62.34634 | 54.42390 |           |           |           |           |           |           |  |  |
| 69755  | 81104  | 972    | down | ing    | NR_038953 | antisense  | LRP8    | 548    | 386    | 4.540574 | 5.586784 | 16.16828 | 15.79176 | 3        | 54.63591 | 4        | 4        | 4.280131  | 4.306189  | 5.0354033 | 5.6675634 | 5.714142  | 5.378647  |  |  |
| 0.0176 | 0.0438 | 2.0650 |      | noncod |           | natural    |         | 20.780 | 57.135 |          |          |          |          | 30.38160 |          | 62.34634 | 54.42390 |           |           |           |           |           |           |  |  |
| 69755  | 81104  | 972    | down | ing    | NR_038953 | antisense  | MAGOH   | 548    | 386    | 4.540574 | 5.586784 | 16.16828 | 15.79176 | 3        | 54.63591 | 4        | 4        | 4.280131  | 4.306189  | 5.0354033 | 5.6675634 | 5.714142  | 5.378647  |  |  |
| 0.0176 | 0.0438 | 2.0650 |      | noncod |           | natural    |         | 20.780 | 57.135 |          |          |          |          | 30.38160 |          | 62.34634 | 54.42390 |           |           |           |           |           |           |  |  |
| 69755  | 81104  | 972    | down | ing    | NR_038953 | antisense  | LRP8    | 548    | 386    | 4.540574 | 5.586784 | 16.16828 | 15.79176 | 3        | 54.63591 | 4        | 4        | 4.280131  | 4.306189  | 5.0354033 | 5.6675634 | 5.714142  | 5.378647  |  |  |
| 0.0176 | 0.0438 | 2.0650 |      | noncod |           | natural    |         | 20.780 | 57.135 |          |          |          |          | 30.38160 |          | 62.34634 | 54.42390 |           |           |           |           |           |           |  |  |
| 69755  | 81104  | 972    | down | ing    | NR_038953 | antisense  | LRP8    | 548    | 386    | 4.540574 | 5.586784 | 16.16828 | 15.79176 | 3        | 54.63591 | 4        | 4        | 4.280131  | 4.306189  | 5.0354033 | 5.6675634 | 5.714142  | 5.378647  |  |  |
| 0.0176 | 0.0438 | 2.0650 |      | noncod |           | natural    |         | 20.780 | 57.135 |          |          |          |          | 30.38160 |          | 62.34634 | 54.42390 |           |           |           |           |           |           |  |  |
| 69755  | 81104  | 972    | down | ing    | NR_038953 | antisense  | LRP8    | 548    | 386    | 4.540574 | 5.586784 | 16.16828 | 15.79176 | 3        | 54.63591 | 4        | 4        | 4.280131  | 4.306189  | 5.0354033 | 5.6675634 | 5.714142  | 5.378647  |  |  |
| 0.0176 | 0.0438 | 2.0650 |      | noncod |           | natural    |         | 20.780 | 57.135 |          |          |          |          | 30.38160 |          | 62.34634 | 54.42390 |           |           |           |           |           |           |  |  |
| 69755  | 81104  | 972    | down | ing    | NR_038953 | antisense  | LRP8    | 548    | 386    | 4.540574 | 5.586784 | 16.16828 | 15.79176 | 3        | 54.63591 | 4        | 4        | 4.280131  | 4.306189  | 5.0354033 | 5.6675634 | 5.714142  | 5.378647  |  |  |





|        |        |        |      |        |            |            |        |        |        |          |          |          |          |          |          |          |          |           |           |           |           |           |           |
|--------|--------|--------|------|--------|------------|------------|--------|--------|--------|----------|----------|----------|----------|----------|----------|----------|----------|-----------|-----------|-----------|-----------|-----------|-----------|
| 42779  | 51886  | 226    |      | ing    |            | antisense  |        | 589    | 0297   |          |          | 8        |          |          | 7        | 8        | 4        |           |           |           |           |           |           |
| 0.0003 | 0.0029 | 2.0202 |      | noncod |            |            |        | 13.765 | 39.178 |          |          |          | 13.16755 | 14.71770 | 31.01331 | 38.96557 |          |           |           |           |           |           |           |
| 4843   | 37506  | 802    | down | ing    | NR_026788  | intergenic |        | 872    | 46     | 4.017445 | 5.032    | 13.41235 | 9        | 8        | 5        | 6        | 47.55649 | 4.009138  | 4.036271  | 4.0069256 | 4.8721027 | 5.043382  | 5.180516  |
| 0.0193 | 0.0469 | 2.7666 |      | noncod | TCONS_00   |            |        | 10.893 | 38.614 |          |          |          | 5.709855 |          | 36.81799 | 40.37468 |          |           |           |           |           |           |           |
| 3884   | 69461  | 33     | down | ing    | 010939     | intergenic |        | 379    | 088    | 3.557505 | 5.025636 | 11.77848 | 6        | 15.1918  | 7        | 38.64958 | 7        | 3.8247697 | 2.7988997 | 4.0488453 | 5.1060705 | 5.031788  | 4.93905   |
| 9.2125 | 0.0014 | 2.2954 |      | noncod |            | natural    | TRNAU1 | 615.78 | 2254.3 |          |          |          | 10.79591 | 553.5503 |          | 693.1950 | 2064.121 | 2145.686  | 2553.288  |           |           |           |           |
| 4E-05  | 02723  | 908    | down | ing    | uc001bqn.3 | antisense  | AP     | 184    | 657    | 9.597116 | 9        | 5        | 600.6001 | 7        | 8        | 5        | 8        | 9.474893  | 9.68783   | 9.628625  | 10.816121 | 10.717035 | 10.8546   |
| 0.0004 | 0.0036 | 3.4357 |      | noncod | ENST0000   | natural    |        | 46.856 | 228.53 |          |          |          | 36.33818 |          | 58.95102 | 203.3199 | 214.2563 | 268.0323  |           |           |           |           |           |
| 88573  | 33673  | 421    | down | ing    | 0541940    | antisense  | SSPN   | 512    | 622    | 5.767752 | 7.548373 | 4        | 45.28033 | 3        | 9        | 5        | 2        | 5.4588933 | 5.854325  | 5.9900365 | 7.524916  | 7.4508944 | 7.6693096 |
| 0.0004 | 0.0036 | 3.4357 |      | noncod | ENST0000   | natural    |        | 46.856 | 228.53 |          |          |          | 36.33818 |          | 58.95102 | 203.3199 | 214.2563 | 268.0323  |           |           |           |           |           |
| 88573  | 33673  | 421    | down | ing    | 0541940    | antisense  | SSPN   | 512    | 622    | 5.767752 | 7.548373 | 4        | 45.28033 | 3        | 9        | 5        | 2        | 5.4588933 | 5.854325  | 5.9900365 | 7.524916  | 7.4508944 | 7.6693096 |
| 0.0001 | 0.0018 | 2.9695 |      | noncod | ENST0000   | intronic   |        | 34.885 | 145.77 |          |          |          | 35.36892 |          | 142.0892 | 141.5231 | 153.7216 |           |           |           |           |           |           |
| 58973  | 43399  | 616    | down | ing    | 0514270    | antisense  | OCLN   | 169    | 7997   | 5.35795  | 6.9282   | 29.40133 | 7        | 39.88525 | 3        | 3        | 3        | 5.1554294 | 5.496031  | 5.42239   | 7.0221663 | 6.880668  | 6.881766  |
| 0.0001 | 0.0018 | 2.9695 |      | noncod | ENST0000   | intronic   |        | 34.885 | 145.77 |          |          |          | 35.36892 |          | 142.0892 | 141.5231 | 153.7216 |           |           |           |           |           |           |
| 58973  | 43399  | 616    | down | ing    | 0514270    | antisense  | OCLN   | 169    | 7997   | 5.35795  | 6.9282   | 29.40133 | 7        | 39.88525 | 3        | 3        | 3        | 5.1554294 | 5.496031  | 5.42239   | 7.0221663 | 6.880668  | 6.881766  |
| 9.6932 | 0.0005 | 2.1574 |      | noncod |            | sense-ove  |        | 208.50 | 682.79 |          |          |          | 199.2392 | 187.8215 | 238.4525 |          | 738.0328 |           |           |           |           |           |           |
| 2E-06  | 49154  | 959    | down | ing    | NR_046106  | rlapping   | NOL8   | 447    | 4913   | 7.979391 | 9.088749 | 6        | 6        | 9        | 600.9877 | 709.3642 | 4        | 7.9454165 | 7.949214  | 8.043543  | 9.048321  | 9.128879  | 9.089047  |
| 9.6932 | 0.0005 | 2.1574 |      | noncod |            | sense-ove  |        | 208.50 | 682.79 |          |          |          | 199.2392 | 187.8215 | 238.4525 |          | 738.0328 |           |           |           |           |           |           |
| 2E-06  | 49154  | 959    | down | ing    | NR_046106  | rlapping   | NOL8   | 447    | 4913   | 7.979391 | 9.088749 | 6        | 6        | 9        | 600.9877 | 709.3642 | 4        | 7.9454165 | 7.949214  | 8.043543  | 9.048321  | 9.128879  | 9.089047  |
| 9.6932 | 0.0005 | 2.1574 |      | noncod |            | natural    |        | 208.50 | 682.79 |          |          |          | 199.2392 | 187.8215 | 238.4525 |          | 738.0328 |           |           |           |           |           |           |
| 2E-06  | 49154  | 959    | down | ing    | NR_046106  | antisense  | CENPP  | 447    | 4913   | 7.979391 | 9.088749 | 6        | 6        | 9        | 600.9877 | 709.3642 | 4        | 7.9454165 | 7.949214  | 8.043543  | 9.048321  | 9.128879  | 9.089047  |
| 0.0003 | 0.0029 | 2.1590 |      | noncod | ENST0000   | bidirectio |        | 43.677 | 133.50 |          |          |          | 38.72342 | 45.63911 |          | 127.3476 | 129.6579 | 143.5150  |           |           |           |           |           |
| 56616  | 87585  | 953    | down | ing    | 0444410    | nal        | PCBP1  | 209    | 6918   | 5.689894 | 6.800321 | 3        | 4        | 46.66909 | 94       | 7        | 9        | 5.5530186 | 5.8668146 | 5.6498494 | 6.8666854 | 6.755043  | 6.779235  |
| 6.1286 | 0.0004 | 2.2450 |      | noncod |            | natural    | FAM211 | 1190.0 | 4286.6 | 10.54483 |          |          | 1187.039 | 1071.650 | 1311.533 | 3746.615 | 4546.697 | 4566.622  |           |           |           |           |           |
| 4E-06  | 7214   | 979    | down | ing    | NR_027170  | antisense  | A      | 745    | 45133  | 2        | 11.71161 | 3        | 3        | 9        | 5        | 3        | 6        | 10.571324 | 10.530873 | 10.532299 | 11.662023 | 11.778482 | 11.694326 |
| 6.1286 | 0.0004 | 2.2450 |      | noncod |            | natural    | FAM211 | 1190.0 | 4286.6 | 10.54483 |          |          | 1187.039 | 1071.650 | 1311.533 | 3746.615 | 4546.697 | 4566.622  |           |           |           |           |           |
| 4E-06  | 7214   | 979    | down | ing    | NR_027170  | antisense  | A      | 745    | 45133  | 2        | 11.71161 | 3        | 3        | 9        | 5        | 3        | 6        | 10.571324 | 10.530873 | 10.532299 | 11.662023 | 11.778482 | 11.694326 |
| 0.0001 | 0.0015 | 2.1762 |      | noncod |            | intronic   | FAM211 | 930.65 | 3247.2 | 10.18700 |          |          | 951.1203 |          | 1062.526 |          | 3464.060 | 3478.498  |           |           |           |           |           |
| 1868   | 73059  | 475    | down | ing    | NR_045025  | antisense  | A      | 5487   | 21533  | 7        | 11.30885 | 6        | 778.3199 | 2        | 2799.106 | 3        | 3        | 10.253954 | 10.065527 | 10.24154  | 11.240263 | 11.39223  | 11.294056 |
| 0.0001 | 0.0015 | 2.1762 |      | noncod |            | intronic   | FAM211 | 930.65 | 3247.2 | 10.18700 |          |          | 951.1203 |          | 1062.526 |          | 3464.060 | 3478.498  |           |           |           |           |           |
| 1868   | 73059  | 475    | down | ing    | NR_045025  | antisense  | A      | 5487   | 21533  | 7        | 11.30885 | 6        | 778.3199 | 2        | 2799.106 | 3        | 3        | 10.253954 | 10.065527 | 10.24154  | 11.240263 | 11.39223  | 11.294056 |
| 0.0010 | 0.0059 | 3.6705 |      | noncod | TCONS_00   |            |        | 5.8584 | 28.645 |          |          |          | 4.999999 | 5.755028 |          | 24.95868 | 36.18377 |           |           |           |           |           |           |
| 96786  | 7      | 541    | down | ing    | 013515     | intergenic |        | 25     | 539    | 2.707761 | 4.583759 | 6.820246 | 5        | 7        | 24.79416 | 3        | 3        | 3.0323143 | 2.3528795 | 2.7380893 | 4.558418  | 4.4150963 | 4.7777624 |
| 0.0219 | 0.0517 | 2.2938 |      | noncod | ENST0000   | natural    |        | 9.5120 | 28.264 |          |          |          | 5.673619 | 13.79826 | 24.27641 |          | 30.72284 |           |           |           |           |           |           |
| 48071  | 78458  | 282    | down | ing    | 0534988    | antisense  | NUDT22 | 57     | 145    | 3.378894 | 4.576651 | 9.064284 | 3        | 8        | 3        | 29.79318 | 3        | 3.4339576 | 2.788996  | 3.9137275 | 4.5273366 | 4.6670685 | 4.535548  |
| 0.0219 | 0.0517 | 2.2938 |      | noncod | ENST0000   | natural    |        | 9.5120 | 28.264 |          |          |          | 5.673619 | 13.79826 | 24.27641 |          | 30.72284 |           |           |           |           |           |           |
| 48071  | 78458  | 282    | down | ing    | 0534988    | antisense  | NUDT22 | 57     | 145    | 3.378894 | 4.576651 | 9.064284 | 3        | 8        | 3        | 29.79318 | 3        | 3.4339576 | 2.788996  | 3.9137275 | 4.5273366 | 4.6670685 | 4.535548  |
| 0.0219 | 0.0517 | 2.2938 |      | noncod | ENST0000   | natural    |        | 9.5120 | 28.264 |          |          |          | 5.673619 | 13.79826 | 24.27641 |          | 30.72284 |           |           |           |           |           |           |
| 48071  | 78458  | 282    | down | ing    | 0534988    | antisense  | DNAJC4 | 57     | 145    | 3.378894 | 4.576651 | 9.064284 | 3        | 8        | 3        | 29.79318 | 3        | 3.4339576 | 2.788996  | 3.9137275 | 4.5273366 | 4.6670685 | 4.535548  |
| 0.0219 | 0.0517 | 2.2938 |      | noncod | ENST0000   | natural    |        | 9.5120 | 28.264 |          |          |          | 5.673619 | 13.79826 | 24.27641 |          | 30.72284 |           |           |           |           |           |           |
| 48071  | 78458  | 282    | down | ing    | 0534988    | antisense  | NUDT22 | 57     | 145    | 3.378894 | 4.576651 | 9.064284 | 3        | 8        | 3        | 29.79318 | 3        | 3.4339576 | 2.788996  | 3.9137275 | 4.5273366 | 4.6670685 | 4.535548  |
| 0.0175 | 0.0436 | 2.1555 |      | noncod | ENST0000   |            |        | 44.447 | 132.08 |          |          |          | 32.34224 |          | 142.9837 | 142.0911 | 111.1828 |           |           |           |           |           |           |
| 51099  | 58298  | 414    | down | ing    | 0439157    | intergenic |        | 829    | 5883   | 5.669386 | 6.777437 | 7        | 40.33211 | 60.66913 | 2        | 1        | 2        | 5.286143  | 5.689642  | 6.0323744 | 7.0291524 | 6.8865294 | 6.4166284 |
| 7.5168 | 0.0012 | 2.0631 |      | noncod |            |            |        | 948.97 | 3169.4 | 10.22479 | 11.26966 | 858.7229 |          | 1094.419 | 2751.925 | 3271.164 | 3485.163 |           |           |           |           |           |           |
| E-05   | 57709  | 761    | down | ing    | uc010lcl.3 | intergenic |        | 002    | 179    | 8        | 5        | 6        | 893.7675 | 6        | 5        | 6        | 6        | 10.11333  | 10.27216  | 10.288905 | 11.213822 | 11.299354 | 11.29582  |
| 0.0003 | 0.0030 | 3.1425 |      | noncod | ENST0000   | natural    | TRNAU1 | 24.892 | 110.30 |          |          |          | 23.66432 | 23.08717 | 105.6754 |          |          |           |           |           |           |           |           |
| 6798   | 43618  | 779    | down | ing    | 0464612    | antisense  | AP     | 008    | 3105   | 4.875806 | 6.527754 | 27.92452 | 6        | 7        | 15       | 99.4246  | 125.8093 | 5.0812244 | 4.90541   | 4.640783  | 6.6110206 | 6.379003  | 6.5932393 |
| 0.0006 | 0.0042 | 3.4121 |      | noncod |            | natural    |        | 23.128 | 110.83 |          |          |          | 28.10436 | 19.64899 | 21.63070 |          | 107.0169 |           |           |           |           |           |           |
| 43579  | 78864  | 913    | down | ing    | NR_001459  | antisense  | GLRX5  | 019    | 3923   | 4.755832 | 6.52653  | 2        | 3        | 1        | 93.54646 | 1        | 131.9384 | 5.090216  | 4.627254  | 4.5500245 | 6.4270477 | 6.486173  | 6.6663694 |
| 0.0005 | 0.0040 | 2.4475 |      | noncod | ENST0000   | sense-ove  |        | 18.990 | 64.427 |          |          |          | 15.28125 |          | 53.16488 | 68.49682 |          |           |           |           |           |           |           |
| 90505  | 58656  | 852    | down | ing    | 0569353    | rlapping   | VPS35  | 85     | 851    | 4.458813 | 5.750172 | 18.34972 | 1        | 23.34158 | 6        | 6        | 71.62184 | 4.460173  | 4.25995   | 4.6563168 | 5.6312833 | 5.8476267 | 5.771607  |
| 0.0210 | 0.0501 | 2.7170 |      | noncod | ENST0000   | natural    |        | 6.3698 | 21.273 |          |          |          | 4.999999 |          | 20.06227 | 22.45427 | 21.30424 |           |           |           |           |           |           |
| 69732  | 22791  | 491    | down | ing    | 0433905    | antisense  | ZBTB46 | 39     | 601    | 2.729332 | 4.171373 | 5        | 9.109519 | 5        | 9        | 5        | 9        | 2.3494408 | 3.490716  | 2.3478405 | 4.257619  | 4.264249  | 3.9922512 |
| 0.0306 | 0.0669 | 2.5972 |      | noncod | ENST0000   | intronic   |        | 7.4416 | 25.649 |          |          |          | 8.644073 |          | 4.999999 | 29.77104 | 25.71864 | 21.46012  |           |           |           |           |           |
| 7649   | 35902  | 337    | down | ing    | 0585088    | antisense  | ANK1   | 47     | 94     | 3.04613  | 4.423106 | 5        | 8.680868 | 5        | 2        | 9        | 9        | 3.3682942 | 3.422255  | 2.3478405 | 4.8107142 | 4.456415  | 4.002188  |
| 0.0306 | 0.0669 | 2.5972 |      | noncod | ENST0000   | intronic   |        | 7.4416 | 25.649 |          |          |          | 8.644073 |          | 4.999999 | 29.77104 | 25.71864 | 21.46012  |           |           |           |           |           |
| 7649   | 35902  | 337    | down | ing    | 0585088    | antisense  | ANK1   | 47     | 94     | 3.04613  | 4.423106 | 5        | 8.680868 | 5        | 2        | 9        | 9        | 3.3682942 | 3.422255  | 2.3478405 | 4.8107142 | 4.456415  | 4.002188  |
| 0.0306 | 0.0669 | 2.5972 |      | noncod | ENST0000   | intronic   |        | 7.4416 | 25.649 |          |          |          | 8.644073 |          | 4.999999 | 29.77104 | 25.71864 | 21.46012  |           |           |           |           |           |
| 7649   | 35902  | 337    | down | ing    | 0585088    | antisense  | ANK1   | 47     | 94     | 3.04613  | 4.4231   |          |          |          |          |          |          |           |           |           |           |           |           |







|        |        |        |      |        |            |            |         |        |        |          |          |          |          |          |          |          |          |           |           |           |           |           |           |
|--------|--------|--------|------|--------|------------|------------|---------|--------|--------|----------|----------|----------|----------|----------|----------|----------|----------|-----------|-----------|-----------|-----------|-----------|-----------|
| 7.4379 | 0.0012 | 2.4458 |      | noncod |            | natural    | KIAA091 | 118.15 | 423.56 |          |          | 104.7522 | 109.2950 | 140.4292 | 380.8243 | 430.2962 |          |           |           |           |           |           |           |
| 7E-05  | 50298  | 366    | down | ing    | NR_038357  | antisense  | 3       | 8857   | 4567   | 7.13901  | 8.429338 | 8        | 1        | 8        | 4        | 6        | 459.5731 | 7.0009336 | 7.1505475 | 7.2655478 | 8.416065  | 8.443575  | 8.428373  |
| 7.4379 | 0.0012 | 2.4458 |      | noncod |            | natural    | KIAA091 | 118.15 | 423.56 |          |          | 104.7522 | 109.2950 | 140.4292 | 380.8243 | 430.2962 |          |           |           |           |           |           |           |
| 7E-05  | 50298  | 366    | down | ing    | NR_038357  | antisense  | 3       | 8857   | 4567   | 7.13901  | 8.429338 | 8        | 1        | 8        | 4        | 6        | 459.5731 | 7.0009336 | 7.1505475 | 7.2655478 | 8.416065  | 8.443575  | 8.428373  |
| 9.3414 | 0.0014 | 2.0188 |      | noncod |            | sense-ove  |         | 95.011 | 279.02 |          |          |          |          |          | 103.1822 | 242.7755 |          | 291.1341  |           |           |           |           |           |
| 3E-05  | 08434  | 969    | down | ing    | NR_030774  | lapping    | UPRT    | 78     | 637    | 6.825607 | 7.839174 | 90.21283 | 91.64028 | 3        | 9        | 303.1694 | 2        | 6.781271  | 6.891142  | 6.8044086 | 7.784679  | 7.9485216 | 7.7843227 |
| 0.0061 | 0.0198 | 2.0624 |      | noncod | ENST0000   | sense-ove  | TIMM23  | 57.833 | 166.54 |          |          |          |          | 40.74430 |          | 152.7428 | 160.4594 | 186.4338  |           |           |           |           |           |
| 13664  | 49673  | 307    | down | ing    | 0429104    | lapping    | B       | 885    | 5367   | 6.066485 | 7.11083  | 68.06136 | 5        | 64.69599 | 4        | 1        | 5        | 6.369539  | 5.7028594 | 6.127056  | 7.126536  | 7.050896  | 7.1550593 |
| 0.0067 | 0.0214 | 2.0537 |      | noncod | ENST0000   |            |         | 28.570 | 80.486 |          |          | 34.04797 | 20.26795 | 31.39611 | 75.30949 |          | 86.02109 |           |           |           |           |           |           |
| 88202  | 62385  | 069    | down | ing    | 0502249    |            |         | 682    | 443    | 5.039305 | 6.077535 | 4        | 8        | 4        | 4        | 80.12874 | 5        | 5.3617816 | 4.672024  | 5.084108  | 6.124164  | 6.0712924 | 6.037148  |
| 3.5512 | 0.0004 | 2.9035 |      | noncod | ENST0000   | bidirectio |         | 182.27 | 805.56 |          |          | 181.7082 | 172.1732 | 192.9581 |          |          | 900.5329 |           |           |           |           |           |           |
| 6E-06  | 05245  | 315    | down | ing    | 0436656    | nal        | ZBTB37  | 9883   | 612    | 7.788129 | 9.325938 | 7        | 5        | 3        | 701.9317 | 814.2337 | 6        | 7.813784  | 7.821701  | 7.728903  | 9.270519  | 9.330796  | 9.376499  |
| 3.5512 | 0.0004 | 2.9035 |      | noncod | ENST0000   | bidirectio |         | 182.27 | 805.56 |          |          | 181.7082 | 172.1732 | 192.9581 |          |          | 900.5329 |           |           |           |           |           |           |
| 6E-06  | 05245  | 315    | down | ing    | 0436656    | nal        | ZBTB37  | 9883   | 612    | 7.788129 | 9.325938 | 7        | 5        | 3        | 701.9317 | 814.2337 | 6        | 7.813784  | 7.821701  | 7.728903  | 9.270519  | 9.330796  | 9.376499  |
| 4.7262 | 0.0010 | 2.3624 |      | noncod | ENST0000   | bidirectio |         | 251.19 | 913.63 |          |          | 232.7831 | 248.0871 | 272.7072 |          |          | 1008.523 |           |           |           |           |           |           |
| 8E-05  | 22563  | 192    | down | ing    | 0437416    | nal        | CNIH3   | 2547   | 0333   | 8.26146  | 9.501725 | 9        | 7        | 8        | 856.555  | 875.8123 | 7        | 8.18317   | 8.366496  | 8.234714  | 9.551873  | 9.429223  | 9.524079  |
| 0.0045 | 0.0160 | 2.9796 |      | noncod | ENST0000   |            |         | 15.733 | 64.942 |          |          |          | 20.28331 | 15.31292 |          |          | 62.17827 |           |           |           |           |           |           |
| 5806   | 5755   | 291    | down | ing    | 0457457    | intergenic |         | 539    | 005    | 4.178522 | 5.753655 | 11.60437 | 8        | 9        | 52.74861 | 6        | 79.89913 | 3.803632  | 4.673446  | 4.058488  | 5.6187353 | 5.710944  | 5.931285  |
| 0.0014 | 0.0072 | 2.0213 |      | noncod | ENST0000   | intronic   |         | 119.87 | 354.29 |          |          | 112.3130 | 98.81299 | 148.4953 |          |          | 370.4393 |           |           |           |           |           |           |
| 91881  | 94997  | 445    | down | ing    | 0549565    | antisense  | CNPY2   | 3802   | 431    | 7.149327 | 8.164642 | 2        | 6        | 9        | 283.4199 | 3        | 409.0237 | 7.106003  | 6.9995627 | 7.342414  | 7.9998794 | 8.229554  | 8.264492  |
| 0.0014 | 0.0072 | 2.0213 |      | noncod | ENST0000   | natural    |         | 119.87 | 354.29 |          |          | 112.3130 | 98.81299 | 148.4953 |          |          | 370.4393 |           |           |           |           |           |           |
| 91881  | 94997  | 445    | down | ing    | 0549565    | antisense  | CNPY2   | 3802   | 431    | 7.149327 | 8.164642 | 2        | 6        | 9        | 283.4199 | 3        | 409.0237 | 7.106003  | 6.9995627 | 7.342414  | 7.9998794 | 8.229554  | 8.264492  |
| 0.0014 | 0.0072 | 2.0213 |      | noncod | ENST0000   | natural    |         | 119.87 | 354.29 |          |          | 112.3130 | 98.81299 | 148.4953 |          |          | 370.4393 |           |           |           |           |           |           |
| 91881  | 94997  | 445    | down | ing    | 0549565    | antisense  | CS      | 3802   | 431    | 7.149327 | 8.164642 | 2        | 6        | 9        | 283.4199 | 3        | 409.0237 | 7.106003  | 6.9995627 | 7.342414  | 7.9998794 | 8.229554  | 8.264492  |
| 0.0027 | 0.0110 | 8.8551 |      | noncod | ENST0000   |            |         | 9.0017 | 95.161 |          |          | 7.375683 | 4.999999 | 14.62946 |          |          | 108.8028 |           |           |           |           |           |           |
| 24145  | 67758  | 503    | down | ing    | 0426124    | intergenic |         | 17     | 457    | 3.165525 | 6.312042 | 3        | 5        | 9        | 85.06734 | 91.61414 | 9        | 3.1460724 | 2.3528795 | 3.9976237 | 6.29196   | 6.2580605 | 6.3861055 |
| 0.0028 | 0.0115 | 3.3244 |      | noncod | ENST0000   |            |         | 5.7775 | 23.988 |          |          |          | 4.999999 | 4.999999 |          |          | 22.63135 | 26.44951  |           |           |           |           |           |
| 96404  | 37184  | 017    | down | ing    | 0559960    | intergenic |         | 9      | 741    | 2.612487 | 4.345582 | 7.332772 | 5        | 5        | 22.88536 | 1        | 2        | 3.1367412 | 2.3528795 | 2.3478405 | 4.4415627 | 4.2756476 | 4.319535  |
| 0.0003 | 0.0029 | 2.0782 |      | noncod | ENST0000   | natural    |         | 58.963 | 176.01 |          |          |          | 59.38683 |          |          | 167.7211 | 169.2811 | 191.0425  |           |           |           |           |           |
| 41056  | 01541  | 201    | down | ing    | 0369391    | antisense  | TCF7L2  | 939    | 498    | 6.134266 | 7.189614 | 59.29918 | 7        | 58.2058  | 9        | 9        | 6        | 6.169638  | 6.2605667 | 5.972593  | 7.2548294 | 7.1257167 | 7.188297  |
| 0.0003 | 0.0029 | 2.0782 |      | noncod | ENST0000   | natural    |         | 58.963 | 176.01 |          |          |          | 59.38683 |          |          | 167.7211 | 169.2811 | 191.0425  |           |           |           |           |           |
| 41056  | 01541  | 201    | down | ing    | 0369391    | antisense  | TCF7L2  | 939    | 498    | 6.134266 | 7.189614 | 59.29918 | 7        | 58.2058  | 9        | 9        | 6        | 6.169638  | 6.2605667 | 5.972593  | 7.2548294 | 7.1257167 | 7.188297  |
| 0.0003 | 0.0029 | 2.0782 |      | noncod | ENST0000   | natural    |         | 58.963 | 176.01 |          |          |          | 59.38683 |          |          | 167.7211 | 169.2811 | 191.0425  |           |           |           |           |           |
| 41056  | 01541  | 201    | down | ing    | 0369391    | antisense  | TCF7L2  | 939    | 498    | 6.134266 | 7.189614 | 59.29918 | 7        | 58.2058  | 9        | 9        | 6        | 6.169638  | 6.2605667 | 5.972593  | 7.2548294 | 7.1257167 | 7.188297  |
| 0.0003 | 0.0029 | 2.0782 |      | noncod | ENST0000   | natural    |         | 58.963 | 176.01 |          |          |          | 59.38683 |          |          | 167.7211 | 169.2811 | 191.0425  |           |           |           |           |           |
| 41056  | 01541  | 201    | down | ing    | 0369391    | antisense  | TCF7L2  | 939    | 498    | 6.134266 | 7.189614 | 59.29918 | 7        | 58.2058  | 9        | 9        | 6        | 6.169638  | 6.2605667 | 5.972593  | 7.2548294 | 7.1257167 | 7.188297  |
| 0.0003 | 0.0029 | 2.0782 |      | noncod | ENST0000   | natural    |         | 58.963 | 176.01 |          |          |          | 59.38683 |          |          | 167.7211 | 169.2811 | 191.0425  |           |           |           |           |           |
| 41056  | 01541  | 201    | down | ing    | 0369391    | antisense  | TCF7L2  | 939    | 498    | 6.134266 | 7.189614 | 59.29918 | 7        | 58.2058  | 9        | 9        | 6        | 6.169638  | 6.2605667 | 5.972593  | 7.2548294 | 7.1257167 | 7.188297  |
| 0.0003 | 0.0029 | 2.0782 |      | noncod | ENST0000   | natural    |         | 58.963 | 176.01 |          |          |          | 59.38683 |          |          | 167.7211 | 169.2811 | 191.0425  |           |           |           |           |           |
| 41056  | 01541  | 201    | down | ing    | 0369391    | antisense  | TCF7L2  | 939    | 498    | 6.134266 | 7.189614 | 59.29918 | 7        | 58.2058  | 9        | 9        | 6        | 6.169638  | 6.2605667 | 5.972593  | 7.2548294 | 7.1257167 | 7.188297  |
| 0.0003 | 0.0029 | 2.0782 |      | noncod | ENST0000   | natural    |         | 58.963 | 176.01 |          |          |          | 59.38683 |          |          | 167.7211 | 169.2811 | 191.0425  |           |           |           |           |           |
| 41056  | 01541  | 201    | down | ing    | 0369391    | antisense  | TCF7L2  | 939    | 498    | 6.134266 | 7.189614 | 59.29918 | 7        | 58.2058  | 9        | 9        | 6        | 6.169638  | 6.2605667 | 5.972593  | 7.2548294 | 7.1257167 | 7.188297  |
| 0.0003 | 0.0029 | 2.0782 |      | noncod | ENST0000   | natural    |         | 58.963 | 176.01 |          |          |          | 59.38683 |          |          | 167.7211 | 169.2811 | 191.0425  |           |           |           |           |           |
| 41056  | 01541  | 201    | down | ing    | 0369391    | antisense  | TCF7L2  | 939    | 498    | 6.134266 | 7.189614 | 59.29918 | 7        | 58.2058  | 9        | 9        | 6        | 6.169638  | 6.2605667 | 5.972593  | 7.2548294 | 7.1257167 | 7.188297  |
| 0.0003 | 0.0029 | 2.0782 |      | noncod | ENST0000   | natural    |         | 58.963 | 176.01 |          |          |          | 59.38683 |          |          | 167.7211 | 169.2811 | 191.0425  |           |           |           |           |           |
| 41056  | 01541  | 201    | down | ing    | 0369391    | antisense  | TCF7L2  | 939    | 498    | 6.134266 | 7.189614 | 59.29918 | 7        | 58.2058  | 9        | 9        | 6        | 6.169638  | 6.2605667 | 5.972593  | 7.2548294 | 7.1257167 | 7.188297  |
| 0.0003 | 0.0029 | 2.0782 |      | noncod | ENST0000   | natural    |         | 58.963 | 176.01 |          |          |          | 59.38683 |          |          | 167.7211 | 169.2811 | 191.0425  |           |           |           |           |           |
| 41056  | 01541  | 201    | down | ing    | 0369391    | antisense  | TCF7L2  | 939    | 498    | 6.134266 | 7.189614 | 59.29918 | 7        | 58.2058  | 9        | 9        | 6        | 6.169638  | 6.2605667 | 5.972593  | 7.2548294 | 7.1257167 | 7.188297  |
| 0.0003 | 0.0029 | 2.0782 |      | noncod | ENST0000   | natural    |         | 58.963 | 176.01 |          |          |          | 59.38683 |          |          | 167.7211 | 169.2811 | 191.0425  |           |           |           |           |           |
| 41056  | 01541  | 201    | down | ing    | 0369391    | antisense  | TCF7L2  | 939    | 498    | 6.134266 | 7.189614 | 59.29918 | 7        | 58.2058  | 9        | 9        | 6        | 6.169638  | 6.2605667 | 5.972593  | 7.2548294 | 7.1257167 | 7.188297  |
| 0.0094 | 0.0274 | 2.0167 |      | noncod | TCONS_00   |            |         | 26.329 | 73.126 |          |          | 20.31811 | 24.96099 |          |          | 80.85857 |          |           |           |           |           |           |           |
| 30336  | 65701  | 098    | down | ing    | 006466     | intergenic |         | 32     | 078    | 4.926553 | 5.938556 | 33.70885 | 5        | 5        | 69.30875 | 69.21091 | 4        | 5.348635  | 4.677127  | 4.753896  | 6.0040307 | 5.8630714 | 5.9485664 |
| 2.2817 | 0.0007 | 2.0343 |      | noncod |            | intronic   |         | 211.82 | 653.56 |          |          | 212.1106 |          |          |          | 238.2046 |          |           |           |           |           |           |           |
| 9E-05  | 58104  | 305    | down | ing    | uc003vcp.1 | antisense  | MLL5    | 0203   | 39     | 8.002467 | 9.027021 | 9        | 185.1453 | 2        | 577.0285 | 652.8151 | 730.8481 | 8.039097  | 7.9263277 | 8.041976  | 8.99118   | 9.01548   | 9.074403  |
| 2.2817 | 0.0007 | 2.0343 |      | noncod |            | intronic   |         | 211.82 | 653.56 |          |          | 212.1106 |          |          |          | 238.2046 |          |           |           |           |           |           |           |
| 9E-05  | 58104  | 305    | down | ing    | uc003vcp.1 | antisense  | MLL5    | 0203   | 39     | 8.002467 | 9.027021 | 9        | 185.1453 | 2        | 577.0285 | 652.8151 | 730.8481 | 8.039097  | 7.9263277 | 8.041976  | 8.99118   | 9.01548   | 9.074403  |
| 0.0071 | 0.0222 | 2.2340 |      | noncod | ENST0000   |            |         | 65.777 | 204.40 |          |          | 56.65174 | 91.93352 | 186.6661 | 225.2315 | 201.3263 |          |           |           |           |           |           |           |
| 0452   | 10365  | 41     | down | ing    | 0450360    |            |         | 86     | 8033   | 6.236898 | 7.396554 | 48.74831 | 5        | 5        | 8        | 5        | 7        | 5.894421  | 6.1835556 | 6.6327186 | 7.406239  | 7.5264482 | 7.25      |













|        |        |        |      |        |            |            |          |        |        |          |          |          |          |          |          |          |           |           |           |           |           |           |            |
|--------|--------|--------|------|--------|------------|------------|----------|--------|--------|----------|----------|----------|----------|----------|----------|----------|-----------|-----------|-----------|-----------|-----------|-----------|------------|
| 77457  | 49035  | 517    |      | ing    | 0439104    | nal        |          | 1      | 478    |          | 4        | 6        |          | 3        | 2        |          |           |           |           |           |           |           |            |
| 0.0009 | 0.0055 | 2.6262 |      | noncod | ENST0000   | bidirectio |          | 6.7506 | 24.785 |          | 5.470502 | 7.444878 |          | 19.96769 | 26.25658 |          |           |           |           |           |           |           |            |
| 77457  | 49035  | 517    | down | ing    | 0439104    | nal        | BUD13    | 1      | 478    | 2.988694 | 4.381699 | 4        | 6        | 7.336448 | 3        | 2        | 28.13216  | 2.7082143 | 3.196879  | 3.0609875 | 4.252485  | 4.484412  | 4.4081993  |
| 0.0006 | 0.0041 | 2.2961 |      | noncod |            |            |          | 39.518 | 127.94 |          | 33.01076 | 41.32577 | 44.22007 | 111.9353 | 126.8648 | 145.0458 |           |           |           |           |           |           |            |
| 05853  | 2655   | 53     | down | ing    | uc001jby.3 | intergenic |          | 871    | 867    | 5.537487 | 6.736706 | 5        | 5        | 4        | 1        | 2        | 8         | 5.317957  | 5.7241783 | 5.570327  | 6.690606  | 6.7251797 | 6.794333   |
| 3.8982 | 0.0004 | 3.8850 |      | noncod | ENST0000   |            |          | 742.76 | 4651.5 |          | 11.82731 | 670.6564 | 857.4007 | 3992.425 |          |          |           |           |           |           |           |           |            |
| 2E-06  | 13042  | 971    | down | ing    | 0422183    | intergenic |          | 623    | 20933  | 9.869361 | 1        | 700.2415 | 3        | 6        | 8        | 4850.534 | 5111.603  | 9.819267  | 9.847395  | 9.94142   | 11.744423 | 11.875824 | 11.861687  |
| 0.0001 | 0.0018 | 2.5010 |      | noncod | ENST0000   |            |          | 274.23 | 1059.4 |          |          |          | 285.5073 | 891.0644 | 1129.452 | 1157.934 |           |           |           |           |           |           |            |
| 64379  | 82305  | 406    | down | ing    | 0519852    | intergenic |          | 1607   | 8375   | 8.383277 | 9.705806 | 298.7517 | 238.4358 | 2        | 5        | 5        | 3         | 8.543079  | 8.308352  | 8.2984    | 9.6053095 | 9.790697  | 9.72141    |
| 0.0030 | 0.0119 | 3.4615 |      | noncod | ENST0000   |            |          | 13.532 | 66.259 |          |          | 16.35125 | 13.66214 | 10.58405 |          |          |           |           |           |           |           |           |            |
| 32974  | 36196  | 136    | down | ing    | 0537764    | intergenic |          | 484    | 987    | 3.977753 | 5.769156 | 2        | 1        | 8        | 48.85307 | 80.76074 | 69.16615  | 4.2946606 | 4.0914316 | 3.547166  | 5.5049725 | 6.0805707 | 5.721924   |
| 8.5639 | 0.0013 | 2.3549 |      | noncod | ENST0000   |            |          | 589.80 | 2191.9 |          | 10.75717 | 534.3226 | 714.3346 | 2033.851 | 2189.277 | 2352.630 |           |           |           |           |           |           |            |
| E-05   | 46636  | 308    | down | ing    | 0514265    | intergenic |          | 683    | 19833  | 9.521488 | 3        | 3        | 520.7632 | 6        | 8        | 3        | 4         | 9.41857   | 9.478252  | 9.667642  | 10.785771 | 10.744246 | 10.741501  |
| 7.0164 | 0.0012 | 2.5010 |      | noncod | ENST0000   | bidirectio |          | 18.488 | 64.843 |          | 18.89124 | 16.98494 |          | 57.23015 |          | 66.08890 |           |           |           |           |           |           |            |
| 2E-05  | 17883  | 739    | down | ing    | 0508123    | nal        | MRPS30   | 48     | 177    | 4.439669 | 5.762216 | 7        | 3        | 19.58925 | 6        | 71.21047 | 5         | 4.498585  | 4.4098864 | 4.4105344 | 5.730973  | 5.8995566 | 5.6561193  |
|        |        |        |      |        |            | intron     |          |        |        |          |          |          |          |          |          |          |           |           |           |           |           |           |            |
| 0.0024 | 0.0103 | 3.9493 |      | noncod | ENST0000   | sense-ove  |          | 5.8437 | 29.138 |          | 7.531284 | 4.999999 | 4.999999 | 23.84376 | 26.84325 | 36.72892 |           |           |           |           |           |           |            |
| 54982  | 03216  | 922    | down | ing    | 0366153    | rlapping   | CLHC1    | 61     | 648    | 2.625427 | 4.607058 | 3        | 5        | 5        | 3        | 4        | 8         | 3.175561  | 2.3528795 | 2.3478405 | 4.5011945 | 4.518459  | 4.8015194  |
|        |        |        |      |        |            | intron     |          |        |        |          |          |          |          |          |          |          |           |           |           |           |           |           |            |
| 0.0024 | 0.0103 | 3.9493 |      | noncod | ENST0000   | sense-ove  |          | 5.8437 | 29.138 |          | 7.531284 | 4.999999 | 4.999999 | 23.84376 | 26.84325 | 36.72892 |           |           |           |           |           |           |            |
| 54982  | 03216  | 922    | down | ing    | 0366153    | rlapping   | CLHC1    | 61     | 648    | 2.625427 | 4.607058 | 3        | 5        | 5        | 3        | 4        | 8         | 3.175561  | 2.3528795 | 2.3478405 | 4.5011945 | 4.518459  | 4.8015194  |
| 1.4754 | 0.0003 | 2.0992 |      | noncod | ENST0000   |            |          | 454.44 | 1506.8 |          | 10.21373 | 445.5879 | 406.6695 | 511.0626 | 1345.704 | 1556.466 | 1618.316  |           |           |           |           |           |            |
| 2E-06  | 33887  | 039    | down | ing    | 0538790    | intergenic |          | 0053   | 29433  | 9.143891 | 3        | 2        | 6        | 8        | 6        | 9        | 8         | 9.153605  | 9.107879  | 9.170188  | 10.196393 | 10.243347 | 10.201459  |
| 0.0002 | 0.0025 | 2.5454 |      | noncod | ENST0000   |            |          | 185.09 | 714.32 |          | 192.5568 | 186.6912 | 176.0443 |          |          | 797.1640 |           |           |           |           |           |           |            |
| 84788  | 97381  | 16     | down | ing    | 0560029    | intergenic |          | 7487   | 3053   | 7.808849 | 9.15675  | 8        | 4        | 4        | 652.1595 | 693.6456 | 6         | 7.895686  | 7.9395347 | 7.591325  | 9.165402  | 9.103353  | 9.201495   |
| 3.3513 | 0.0008 | 3.2506 |      | noncod | ENST0000   | bidirectio |          | 39.367 | 183.29 |          |          | 36.24891 |          | 151.6453 | 189.4587 | 208.7837 |           |           |           |           |           |           |            |
| 3E-05  | 74299  | 052    | down | ing    | 0534499    | nal        | RAB30    | 891    | 596    | 5.531923 | 7.232632 | 35.67958 | 3        | 46.17518 | 9        | 1        | 8         | 5.43203   | 5.531081  | 5.632659  | 7.1147184 | 7.278205  | 7.3049717  |
| 0.0005 | 0.0038 | 2.8433 |      | noncod | ENST0000   |            |          | 6.5310 | 26.037 |          | 7.138479 | 5.361821 |          | 22.78143 | 23.01739 | 32.31336 |           |           |           |           |           |           |            |
| 31406  | 17685  | 126    | down | ing    | 0422178    | intergenic |          | 77     | 397    | 2.941611 | 4.449184 | 7        | 7        | 7.09293  | 3        | 1        | 6         | 3.0976863 | 2.7125454 | 3.014602  | 4.4342194 | 4.298573  | 4.6147594  |
| 0.0004 | 0.0035 | 2.3476 |      | noncod | ENST0000   |            |          | 140.85 | 488.56 |          | 125.4461 | 125.4279 | 171.6926 |          |          |          |           |           |           |           |           |           |            |
| 79514  | 94667  | 089    | down | ing    | 0561706    | intergenic |          | 5583   | 0367   | 7.395367 | 8.626559 | 5        | 9        | 1        | 470.798  | 435.9482 | 558.9349  | 7.27157   | 7.360917  | 7.5536127 | 8.715439  | 8.458841  | 8.705396   |
| 0.0001 | 0.0019 | 2.0422 |      | noncod | ENST0000   |            |          | 86.471 | 254.18 |          |          | 84.38386 | 98.83095 | 229.2935 | 252.1481 | 281.1192 |           |           |           |           |           |           |            |
| 67029  | 02049  | 298    | down | ing    | 0584023    | intergenic |          | 027    | 699    | 6.679648 | 7.709793 | 76.19826 | 5        | 6        | 6        | 8        | 3         | 6.533102  | 6.7698135 | 6.736027  | 7.7059474 | 7.685364  | 7.7380667  |
| 4.7348 | 0.0004 | 2.2599 |      | noncod |            | intronic   |          | 3334.6 | 12134. | 12.04691 | 13.22320 | 3284.659 |          | 10752.74 | 12470.32 | 13181.63 |           |           |           |           |           |           |            |
| E-06   | 28594  | 494    | down | ing    | uc010tki.2 | antisense  | GAS6     | 868    | 90267  | 5        | 6        | 4        | 2916.999 | 3802.402 | 2        | 7        | 9         | 12.075972 | 11.989416 | 12.075357 | 13.183156 | 13.247196 | 13.2392645 |
| 6.8605 | 0.0012 | 2.6477 |      | noncod |            |            |          | 234.27 | 955.19 |          | 227.8795 | 205.2713 | 269.6696 |          | 1061.967 | 1001.191 |           |           |           |           |           |           |            |
| 3E-05  | 03844  | 694    | down | ing    | uc010rog.2 | intergenic |          | 3503   | 91     | 8.151095 | 9.555873 | 3        | 3        | 5        | 802.4389 | 3        | 1         | 8.15056   | 8.0839205 | 8.218805  | 9.456802  | 9.696715  | 9.514101   |
| 0.0003 | 0.0030 | 2.2096 |      | noncod | ENST0000   |            |          | 64.989 | 208.04 |          |          | 62.01394 |          | 177.0665 | 227.8348 | 219.2323 |           |           |           |           |           |           |            |
| 66044  | 34272  | 342    | down | ing    | 0507736    | intergenic |          | 278    | 4573   | 6.273895 | 7.417703 | 68.58209 | 3        | 64.3718  | 9        | 1        | 2         | 6.3814526 | 6.320715  | 6.1195173 | 7.333308  | 7.545493  | 7.3745346  |
| 8.2846 | 0.0013 | 5.7932 |      | noncod | TCONS_00   |            |          | 35.688 |        | 4.999999 | 4.999999 | 4.999999 | 25.41628 |          | 45.58146 |          |           |           |           |           |           |           |            |
| 3E-05  | 2029   | 29     | down | ing    | 012765     | intergenic |          | 5      | 441    | 2.350054 | 4.884421 | 5        | 5        | 5        | 36.06757 | 7        | 2.3494408 | 2.3528795 | 2.3478405 | 4.591678  | 4.9401402 | 5.1214457 |            |
| 0.0064 | 0.0206 | 3.7478 |      | noncod |            |            |          | 16.111 | 82.787 |          |          | 19.13049 | 10.17025 | 65.34830 | 89.79027 |          |           |           |           |           |           |           |            |
| 55759  | 93177  | 304    | down | ing    | AW340022   | intergenic |          | 335    | 614    | 4.196389 | 6.102444 | 19.03325 | 7        | 9        | 5        | 6        | 93.22426  | 4.5095835 | 4.5880957 | 3.4914863 | 5.917451  | 6.2281685 | 6.161713   |
| 0.0001 | 0.0015 | 2.5709 |      | noncod | ENST0000   |            |          | 11.849 | 42.514 |          |          | 10.40100 | 12.58528 | 35.59255 |          | 46.08819 |           |           |           |           |           |           |            |
| 22485  | 96353  | 807    | down | ing    | 0553470    | intergenic |          | 144    | 968    | 3.796995 | 5.159314 | 12.56115 | 1        | 1        | 2        | 45.86416 | 2         | 3.9166594 | 3.6870985 | 3.7872286 | 5.061447  | 5.2797375 | 5.1367583  |
| 0.0079 | 0.0242 | 2.2752 |      | noncod | ENST0000   |            |          | 9.1069 | 28.371 |          |          |          | 11.35736 | 23.35983 | 34.44036 | 27.31462 |           |           |           |           |           |           |            |
| 88729  | 8681   | 258    | down | ing    | 0554946    | intergenic |          | 15     | 608    | 3.385189 | 4.571199 | 9.322197 | 6.64118  | 9        | 3        | 5        | 5         | 3.4794168 | 3.0309849 | 3.645166  | 4.4710417 | 4.8793087 | 4.3632464  |
|        |        |        |      |        |            | intron     |          |        |        |          |          |          |          |          |          |          |           |           |           |           |           |           |            |
| 0.0001 | 0.0014 | 2.4027 |      | noncod | ENST0000   | sense-ove  | RP11-102 | 210.69 | 762.64 |          |          | 178.5983 | 254.8252 | 690.0765 |          |          |           |           |           |           |           |           |            |
| 00504  | 53298  | 624    | down | ing    | 0566734    | rlapping   | IN1.1    | 0583   | 318    | 7.984951 | 9.249645 | 198.6482 | 1        | 4        | 4        | 783.7689 | 814.0841  | 7.94217   | 7.872197  | 8.140487  | 9.2462435 | 9.2744465 | 9.228246   |
| 0.0003 | 0.0027 | 2.8254 |      | noncod |            | natural    |          | 77.549 | 313.05 |          |          | 59.29988 | 94.88885 | 280.8547 | 327.5613 | 330.7465 |           |           |           |           |           |           |            |
| 17132  | 81667  | 766    | down | ing    | NR_039978  | antisense  | SEC24B   | 523    | 42     | 6.502882 | 8.001377 | 78.45983 | 5        | 5        | 4        | 4        | 2         | 6.571786  | 6.257758  | 6.679103  | 7.986562  | 8.054401  | 7.9631667  |
| 0.0003 | 0.0027 | 2.8254 |      | noncod |            | natural    |          | 77.549 | 313.05 |          |          | 59.29988 | 94.88885 | 280.8547 | 327.5613 | 330.7465 |           |           |           |           |           |           |            |
| 17132  | 81667  | 766    | down | ing    | NR_039978  | antisense  | SEC24B   | 523    | 42     | 6.502882 | 8.001377 | 78.45983 | 5        | 5        | 4        | 4        | 2         | 6.571786  | 6.257758  | 6.679103  | 7.986562  | 8.054401  | 7.9631667  |
| 0.0003 | 0.0029 | 2.1875 |      | noncod | ENST0000   | natural    |          | 49.819 | 156.57 |          |          | 52.14407 |          | 133.8749 |          | 180.4264 |           |           |           |           |           |           |            |
| 40704  | 01272  | 435    | down | ing    | 0434512    | antisense  | INTS6    | 589    | 754    | 5.887251 | 7.016563 | 46.12484 | 7        | 51.18985 | 8        | 155.4312 | 4         | 5.816167  | 6.0604606 | 5.785126  | 6.939786  | 7.0058646 | 7.1040382  |
|        |        |        |      |        |            | exon       |          |        |        |          |          |          |          |          |          |          |           |           |           |           |           |           |            |
| 0.0303 | 0.0663 | 2.7805 |      | noncod |            | sense-ove  |          | 15.792 | 56.619 |          |          |          |          | 51.99548 | 54.68129 |          |           |           |           |           |           |           |            |
| 42602  | 43294  | 898    | down | ing    | uc001iuv.1 | rlapping   | SVIL     | 608    | 987    | 4.098355 | 5.573746 | 8.355505 | 23.20838 | 15.81394 | 7        | 3        | 63.18318  | 3.3195055 | 4.8735237 | 4.102037  | 5.597259  | 5.5339007 | 5.5900793  |
|        |        |        |      |        |            | intron     |          |        |        |          |          |          |          |          |          |          |           |           |           |           |           |           |            |
| 0.0303 | 0.0663 | 2.7805 |      | noncod |            | sense-ove  |          | 15.792 | 56.619 |          |          |          |          | 51.99548 | 54.68129 |          |           |           |           |           |           |           |            |
| 42602  | 43294  | 898    | down | ing    | uc001iuv.1 | rlapping   | SVIL     |        |        |          |          |          |          |          |          |          |           |           |           |           |           |           |            |







|        |        |        |      |        |            |            |        |        |          |          |          |          |          |          |          |           |           |           |            |           |           |           |           |
|--------|--------|--------|------|--------|------------|------------|--------|--------|----------|----------|----------|----------|----------|----------|----------|-----------|-----------|-----------|------------|-----------|-----------|-----------|-----------|
| 27937  | 76536  | 454    |      | ing    | 0446201    |            | 908    | 082    |          |          | 1        | 3        | 2        | 5        |          |           |           |           |            |           |           |           |           |
| 0.0008 | 0.0049 | 2.2081 |      | noncod |            |            | 24.246 | 74.536 |          | 19.97868 | 25.49521 | 27.26677 | 67.59640 |          |          |           |           |           |            |           |           |           |           |
| 1037   | 2975   | 111    | down | ing    | AK125162   | intergenic | 89     | 522    | 4.82098  | 5.963793 | 5        | 3        | 5        | 74.42017 | 81.59299 | 4.5816507 | 5.0068765 | 4.874413  | 5.967075   | 5.965301  | 5.9590025 |           |           |
| 8.2046 | 0.0005 | 2.7128 |      | noncod |            |            | 960.64 | 4185.2 | 10.23656 | 11.67636 |          |          | 1072.320 | 3754.390 | 4232.380 | 4569.122  |           |           |            |           |           |           |           |
| 7E-06  | 13475  | 347    | down | ing    | uc002suy.1 | intergenic | 6633   | 978    | 2        | 4        | 985.4242 | 824.195  | 7        | 4        | 4        | 6         | 10.307639 | 10.144277 | 10.2577715 | 11.666502 | 11.666502 | 11.696087 |           |
| 0.0024 | 0.0102 | 2.2788 |      | noncod | ENST0000   | natural    | 24.379 | 78.096 |          |          | 29.08063 | 20.24455 | 23.81336 | 62.41613 |          |           |           |           |            |           |           |           |           |
| 42698  | 67657  | 86     | down | ing    | 0501016    | antisense  | 515    | 389    | 4.831282 | 6.019611 | 1        | 3        | 2        | 8        | 81.74383 | 90.1292   | 5.1383266 | 4.670215  | 4.6853056  | 5.853085  | 6.096178  | 6.1095705 |           |
|        |        |        |      |        |            | intron     |        |        |          |          |          |          |          |          |          |           |           |           |            |           |           |           |           |
| 0.0001 | 0.0016 | 2.8700 |      | noncod | ENST0000   | sense-ove  | 41.164 | 168.64 |          |          | 38.73947 | 35.62955 | 49.12351 | 135.8050 | 181.9811 | 188.1393  |           |           |            |           |           |           |           |
| 28618  | 37487  | 812    | down | ing    | 0435858    | rlapping   | FAM46A | 182    | 185      | 5.594621 | 7.115713 | 5        | 5        | 6        | 5        | 4         | 6         | 5.5536404 | 5.5062838  | 5.723939  | 6.957538  | 7.2226014 | 7.1669984 |
| 0.0001 | 0.0015 | 2.1196 |      | noncod | ENST0000   | natural    | EXOSC1 | 249.79 | 808.55   |          |          | 231.2858 | 220.1430 |          | 694.6615 |           |           |           |            |           |           |           |           |
| 15243  | 51192  | 075    | down | ing    | 0435388    | antisense  | 0      | 751    | 702      | 8.245602 | 9.3294   | 6        | 7        | 297.9636 | 6        | 848.2753  | 882.7342  | 8.170729  | 8.198006   | 8.3680725 | 9.257219  | 9.383644  | 9.347336  |
| 0.0001 | 0.0015 | 2.1196 |      | noncod | ENST0000   | natural    | EXOSC1 | 249.79 | 808.55   |          |          | 231.2858 | 220.1430 |          | 694.6615 |           |           |           |            |           |           |           |           |
| 15243  | 51192  | 075    | down | ing    | 0435388    | antisense  | 0      | 751    | 702      | 8.245602 | 9.3294   | 6        | 7        | 297.9636 | 6        | 848.2753  | 882.7342  | 8.170729  | 8.198006   | 8.3680725 | 9.257219  | 9.383644  | 9.347336  |
|        |        |        |      |        |            | intron     |        |        |          |          |          |          |          |          |          |           |           |           |            |           |           |           |           |
| 0.0025 | 0.0106 | 3.0750 |      | noncod | ENST0000   | sense-ove  | 8.7850 | 36.655 |          |          | 6.172610 | 11.47591 | 29.06989 | 41.45277 | 39.44496 |           |           |           |            |           |           |           |           |
| 57177  | 18151  | 966    | down | ing    | 0514241    | rlapping   | MAST4  | 09     | 88       | 3.31832  | 4.938952 | 8.706505 | 3        | 2        | 7        | 8         | 5         | 3.3777184 | 2.9157968  | 3.6614456 | 4.778758  | 5.136211  | 4.901887  |
|        |        |        |      |        |            | intron     |        |        |          |          |          |          |          |          |          |           |           |           |            |           |           |           |           |
| 0.0025 | 0.0106 | 3.0750 |      | noncod | ENST0000   | sense-ove  | 8.7850 | 36.655 |          |          | 6.172610 | 11.47591 | 29.06989 | 41.45277 | 39.44496 |           |           |           |            |           |           |           |           |
| 57177  | 18151  | 966    | down | ing    | 0514241    | rlapping   | MAST4  | 09     | 88       | 3.31832  | 4.938952 | 8.706505 | 3        | 2        | 7        | 8         | 5         | 3.3777184 | 2.9157968  | 3.6614456 | 4.778758  | 5.136211  | 4.901887  |
| 0.0036 | 0.0136 | 2.2423 |      | noncod | ENST0000   |            | 16.699 | 52.080 |          |          |          | 18.91770 |          | 42.10514 | 52.58632 | 61.55036  |           |           |            |           |           |           |           |
| 29415  | 16967  | 049    | down | ing    | 0568246    | intergenic | 572    | 611    | 4.279135 | 5.444117 | 13.04431 | 7        | 18.1367  | 5        | 3        | 5         | 3.9687643 | 4.5731707 | 4.295469   | 5.2973413 | 5.480962  | 5.554048  |           |
| 4.9945 | 0.0010 | 2.3289 |      | noncod |            |            | 58.607 | 197.21 |          |          | 54.76823 |          | 62.93561 | 185.6467 | 187.0991 | 218.8882  |           |           |            |           |           |           |           |
| 3E-05  | 40957  | 653    | down | ing    | NR_036586  | intergenic | 408    | 1363   | 6.124745 | 7.344434 | 8        | 58.11837 | 6        | 3        | 2        | 4         | 6.061634  | 6.225508  | 6.0870924  | 7.3996277 | 7.2626195 | 7.3710546 |           |
| 0.0154 | 0.0396 | 2.7744 |      | noncod | ENST0000   | natural    | 7.6518 | 26.911 |          |          | 4.999999 |          |          | 30.71814 | 29.25539 |           |           |           |            |           |           |           |           |
| 11327  | 71075  | 543    | down | ing    | 0554650    | antisense  | FBXO34 | 97     | 679      | 3.021916 | 4.49412  | 7.785701 | 5        | 10.16999 | 20.7615  | 2         | 4         | 3.2214277 | 2.3528795  | 3.491442  | 4.3049927 | 4.709773  | 4.4675956 |
| 0.0004 | 0.0034 | 2.0680 |      | noncod | ENST0000   |            | 65.714 | 192.77 |          |          | 65.08098 |          |          |          | 198.1176 |           |           |           |            |           |           |           |           |
| 55147  | 72952  | 048    | down | ing    | 0426641    |            | 439    | 1193   | 6.268061 | 7.316301 | 6        | 53.44085 | 78.62148 | 182.0191 | 198.1768 | 8         | 6.3036847 | 6.0967865 | 6.403713   | 7.370158  | 7.3431215 | 7.2356234 |           |
| 0.0005 | 0.0039 | 3.4410 |      | noncod | ENST0000   | intronic   | 6.4489 | 30.891 |          |          | 6.250605 |          | 29.39665 | 25.67761 | 37.59997 |           |           |           |            |           |           |           |           |
| 68908  | 644    | 814    | down | ing    | 0583950    | antisense  | CRLF3  | 7      | 416      | 2.910644 | 4.693506 | 5.338203 | 6        | 7.758102 | 6        | 6         | 2.6700172 | 2.933452  | 3.128464   | 4.7923813 | 4.455136  | 4.833002  |           |
| 0.0006 | 0.0041 | 3.0754 |      | noncod |            | bidirectio | 44.099 | 192.87 |          |          | 52.31368 |          | 45.62793 | 165.3676 | 199.6948 |           |           |           |            |           |           |           |           |
| 07323  | 28197  | 279    | down | ing    | NR_027447  | nal        | MAN1B1 | 613    | 0107     | 5.688129 | 7.308917 | 3        | 34.35722 | 7        | 3        | 9         | 213.5478  | 5.996727  | 5.4531035  | 5.614558  | 7.2356234 | 7.353431  | 7.3376956 |
| 0.0005 | 0.0038 | 5.5077 |      | noncod |            | bidirectio | TNFRSF | 14.335 | 106.06   |          |          |          | 19.57675 |          | 109.2441 | 112.9339  |           |           |            |           |           |           |           |
| 38459  | 42439  | 906    | down | ing    | NR_033928  | nal        | 10A    | 731    | 6823     | 4.011772 | 6.473246 | 13.81571 | 9.61473  | 2        | 96.02243 | 25        | 14        | 4.0528817 | 3.5728722  | 4.4095626 | 6.4671926 | 6.514807  | 6.437738  |
| 0.0152 | 0.0394 | 2.4319 |      | noncod | ENST0000   |            | 7.1850 | 24.261 |          |          | 9.582787 | 5.727289 | 27.75619 | 20.30204 | 24.72541 |           |           |           |            |           |           |           |           |
| 63366  | 41617  | 873    | down | ing    | 0510261    | intergenic | 09     | 218    | 3.066257 | 4.348392 | 6.244949 | 5        | 7        | 3        | 4        | 8         | 2.8997483 | 3.5672464 | 2.7317748  | 4.7146053 | 4.1172633 | 4.213308  |           |
| 0.0192 | 0.0467 | 2.3627 |      | noncod | ENST0000   |            | 16.148 | 49.520 |          |          | 13.54275 | 24.70454 | 44.29227 |          | 54.82282 |           |           |           |            |           |           |           |           |
| 33085  | 8793   | 594    | down | ing    | 0393264    | intergenic | 86     | 35     | 4.142777 | 5.38325  | 10.19928 | 1        | 8        | 4        | 49.44595 | 6         | 3.6114755 | 4.0779595 | 4.738897   | 5.3721523 | 5.3886104 | 5.3889875 |           |
| 0.0051 | 0.0174 | 2.0871 |      | noncod | ENST0000   | intronic   | 10.532 | 29.751 |          |          |          |          | 13.65896 |          | 29.49362 | 29.87421  |           |           |            |           |           |           |           |
| 13904  | 02654  | 682    | down | ing    | 0323689    | antisense  | PFN2   | 761    | 164      | 3.592768 | 4.654315 | 9.820537 | 8.118785 | 2        | 29.88565 | 8         | 4         | 3.5551653 | 3.3241272  | 3.899012  | 4.8161592 | 4.65032   | 4.496466  |
| 0.0051 | 0.0174 | 2.0871 |      | noncod | ENST0000   | intronic   | 10.532 | 29.751 |          |          |          |          | 13.65896 |          | 29.49362 | 29.87421  |           |           |            |           |           |           |           |
| 13904  | 02654  | 682    | down | ing    | 0323689    | antisense  | PFN2   | 761    | 164      | 3.592768 | 4.654315 | 9.820537 | 8.118785 | 2        | 29.88565 | 8         | 4         | 3.5551653 | 3.3241272  | 3.899012  | 4.8161592 | 4.65032   | 4.496466  |
| 5.7751 | 0.0011 | 3.5943 |      | noncod | ENST0000   |            | 66.549 | 346.94 |          |          | 72.17277 |          | 297.1757 |          | 365.3950 |           |           |           |            |           |           |           |           |
| 4E-05  | 11797  | 444    | down | ing    | 0450998    | intergenic | 745    | 4277   | 6.297464 | 8.143193 | 5        | 56.02001 | 71.45645 | 8        | 378.262  | 5         | 6.4559426 | 6.167478  | 6.2689724  | 8.068668  | 8.260838  | 8.100073  |           |
| 0.0080 | 0.0243 | 3.1261 |      | noncod | ENST0000   | natural    | RASGRF | 12.658 | 52.535   |          |          | 18.65243 |          |          | 51.41516 |           |           |           |            |           |           |           |           |
| 26114  | 63644  | 275    | down | ing    | 0316148    | antisense  | 1      | 725    | 672      | 3.823042 | 5.467419 | 3        | 9.069472 | 10.25427 | 5        | 49.07451  | 57.11734  | 4.482973  | 3.4847856  | 3.5013676 | 5.5803533 | 5.3768444 | 5.4450583 |
| 0.0080 | 0.0243 | 3.1261 |      | noncod | ENST0000   | natural    | RASGRF | 12.658 | 52.535   |          |          | 18.65243 |          |          | 51.41516 |           |           |           |            |           |           |           |           |
| 26114  | 63644  | 275    | down | ing    | 0316148    | antisense  | 1      | 725    | 672      | 3.823042 | 5.467419 | 3        | 9.069472 | 10.25427 | 5        | 49.07451  | 57.11734  | 4.482973  | 3.4847856  | 3.5013676 | 5.5803533 | 5.3768444 | 5.4450583 |
| 0.0080 | 0.0243 | 3.1261 |      | noncod | ENST0000   | natural    | RASGRF | 12.658 | 52.535   |          |          | 18.65243 |          |          | 51.41516 |           |           |           |            |           |           |           |           |
| 26114  | 63644  | 275    | down | ing    | 0316148    | antisense  | 1      | 725    | 672      | 3.823042 | 5.467419 | 3        | 9.069472 | 10.25427 | 5        | 49.07451  | 57.11734  | 4.482973  | 3.4847856  | 3.5013676 | 5.5803533 | 5.3768444 | 5.4450583 |
| 2.8319 | 0.0008 | 2.1171 |      | noncod |            | natural    | FAM211 | 1046.0 | 3557.5   | 10.36046 | 11.44259 | 1033.748 | 897.1539 | 1207.152 | 3131.701 |           |           |           |            |           |           |           |           |
| E-05   | 32888  | 547    | down | ing    | NR_027165  | antisense  | A      | 18277  | 89133    | 4        | 1        | 2        | 3        | 7        | 4        | 3715.861  | 3825.205  | 10.378134 | 10.277965  | 10.425293 | 11.400935 | 11.490358 | 11.436479 |
| 2.8319 | 0.0008 | 2.1171 |      | noncod |            | natural    | FAM211 | 1046.0 | 3557.5   | 10.36046 | 11.44259 | 1033.748 | 897.1539 | 1207.152 | 3131.701 |           |           |           |            |           |           |           |           |
| E-05   | 32888  | 547    | down | ing    | NR_027165  | antisense  | A      | 18277  | 89133    | 4        | 1        | 2        | 3        | 7        | 4        | 3715.861  | 3825.205  | 10.378134 | 10.277965  | 10.425293 | 11.400935 | 11.490358 | 11.436479 |
| 8.1480 | 0.0005 | 2.2118 |      | noncod | ENST0000   | bidirectio | 46.416 | 145.66 |          |          | 50.68660 | 140.0811 | 141.1513 | 155.7753 |          |           |           |           |            |           |           |           |           |
| 6E-06  | 13475  | 624    | down | ing    | 0434781    | nal        | PCBP1  | 302    | 929      | 5.78254  | 6.927802 | 45.34233 | 43.21997 | 7        | 8        | 8         | 1         | 5.7917233 | 5.7860947  | 5.769802  | 7.003644  | 6.8772445 | 6.9025164 |
| 0.0060 | 0.0196 | 2.1951 |      | noncod |            | bidirectio | 7.3053 | 21.913 |          |          | 5.578911 | 6.782410 |          | 20.16006 |          | 26.50460  |           |           |            |           |           |           |           |
| 42407  | 74772  | 552    | down | ing    | uc004bav.1 | nal        | TEX10  | 26     | 218      | 3.069737 | 4.20406  | 3        | 6        | 9.554656 | 5        | 19.07498  | 8         | 2.7380893 | 3.0640666  | 3.407054  | 4.2636147 | 4.0249834 | 4.3235807 |
| 0.0060 | 0.0196 | 2.1951 |      | noncod |            | bidirectio | 7.3053 | 21.913 |          |          | 5.578911 | 6.782410 |          | 20.16006 |          | 26.50460  |           |           |            |           |           |           |           |
| 42407  | 74772  | 552    | down | ing    | uc004bav.1 | nal        | TEX10  | 26     | 218      | 3.069737 | 4.20406  | 3        | 6        | 9.554656 | 5        | 19.07498  | 8         | 2.7380893 | 3.0640666  | 3.407054  | 4.2636147 | 4.0249834 | 4.3235807 |
|        |        |        |      |        |            | intron     |        |        |          |          |          |          |          |          |          |           |           |           |            |           |           |           |           |







|        |        |        |      |        |            |            |        |        |        |          |          |          |          |          |          |          |          |           |           |           |           |           |           |
|--------|--------|--------|------|--------|------------|------------|--------|--------|--------|----------|----------|----------|----------|----------|----------|----------|----------|-----------|-----------|-----------|-----------|-----------|-----------|
| 0.0002 | 0.0023 | 2.3819 |      | noncod |            | natural    |        | 37.307 | 124.29 |          |          | 34.84917 |          | 117.4484 | 129.9306 | 125.4969 |          |           |           |           |           |           |           |
| 43376  | 52417  | 539    | down | ing    | uc002ued.3 | antisense  | CERS6  | 511    | 2017   | 5.449949 | 6.702094 | 32.50414 | 4        | 44.56922 | 6        | 8        | 1        | 5.2938075 | 5.47466   | 5.581379  | 6.7593594 | 6.757209  | 6.5897145 |
| 0.0002 | 0.0023 | 2.3819 |      | noncod |            | natural    |        | 37.307 | 124.29 |          |          | 34.84917 |          | 117.4484 | 129.9306 | 125.4969 |          |           |           |           |           |           |           |
| 43376  | 52417  | 539    | down | ing    | uc002ued.3 | antisense  | CERS6  | 511    | 2017   | 5.449949 | 6.702094 | 32.50414 | 4        | 44.56922 | 6        | 8        | 1        | 5.2938075 | 5.47466   | 5.581379  | 6.7593594 | 6.757209  | 6.5897145 |
| 0.0001 | 0.0020 | 3.8410 |      | noncod | ENST0000   | natural    | MARVE  | 26.890 | 145.09 |          |          | 30.87118 | 22.65255 | 27.14745 | 145.1899 | 132.9057 | 157.1881 |           |           |           |           |           |           |
| 83019  | 05675  | 333    | down | ing    | 0562763    | antisense  | LD3    | 395    | 461    | 4.976805 | 6.9183   | 1        | 2        | 1        | 7        | 2        | 4        | 5.223666  | 4.836671  | 4.870079  | 7.0528364 | 6.787272  | 6.914791  |
| 0.0001 | 0.0020 | 3.8410 |      | noncod | ENST0000   | natural    | MARVE  | 26.890 | 145.09 |          |          | 30.87118 | 22.65255 | 27.14745 | 145.1899 | 132.9057 | 157.1881 |           |           |           |           |           |           |
| 83019  | 05675  | 333    | down | ing    | 0562763    | antisense  | LD3    | 395    | 461    | 4.976805 | 6.9183   | 1        | 2        | 1        | 7        | 2        | 4        | 5.223666  | 4.836671  | 4.870079  | 7.0528364 | 6.787272  | 6.914791  |
| 0.0045 | 0.0161 | 6.3737 |      | noncod | ENST0000   |            |        | 11.132 | 86.520 |          |          | 6.400569 | 7.245514 | 19.75281 |          | 92.56943 |          |           |           |           |           |           |           |
| 87765  | 46363  | 722    | down | ing    | 0422542    | intergenic |        | 967    | 608    | 3.505729 | 6.177876 | 4        | 4        | 7        | 78.88951 | 5        | 88.10288 | 2.9364173 | 3.1590824 | 4.421687  | 6.18596   | 6.2754235 | 6.0722456 |
| 0.0014 | 0.0070 | 2.3258 |      | noncod | ENST0000   | intronic   |        | 34.708 | 116.60 |          |          |          |          |          |          | 143.0436 |          |           |           |           |           |           |           |
| 28836  | 92858  | 252    | down | ing    | 0444873    | antisense  | BCL11A | 187    | 54     | 5.356859 | 6.574602 | 33.21858 | 33.06719 | 37.83879 | 83.93799 | 122.8346 | 1        | 5.3267207 | 5.394818  | 5.349039  | 6.2718067 | 6.6771154 | 6.7748837 |
| 0.0014 | 0.0070 | 2.3258 |      | noncod | ENST0000   | intronic   |        | 34.708 | 116.60 |          |          |          |          |          |          | 143.0436 |          |           |           |           |           |           |           |
| 28836  | 92858  | 252    | down | ing    | 0444873    | antisense  | BCL11A | 187    | 54     | 5.356859 | 6.574602 | 33.21858 | 33.06719 | 37.83879 | 83.93799 | 122.8346 | 1        | 5.3267207 | 5.394818  | 5.349039  | 6.2718067 | 6.6771154 | 6.7748837 |
| 0.0014 | 0.0070 | 2.3258 |      | noncod | ENST0000   | intronic   |        | 34.708 | 116.60 |          |          |          |          |          |          | 143.0436 |          |           |           |           |           |           |           |
| 28836  | 92858  | 252    | down | ing    | 0444873    | antisense  | BCL11A | 187    | 54     | 5.356859 | 6.574602 | 33.21858 | 33.06719 | 37.83879 | 83.93799 | 122.8346 | 1        | 5.3267207 | 5.394818  | 5.349039  | 6.2718067 | 6.6771154 | 6.7748837 |
| 0.0013 | 0.0069 | 2.0216 |      | noncod |            |            |        | 128.22 | 380.34 |          |          | 140.3932 | 101.4777 | 142.8121 | 322.5729 | 385.5401 | 432.9262 |           |           |           |           |           |           |
| 74723  | 07575  | 426    | down | ing    | uc021pvt.1 | intergenic |        | 7703   | 6467   | 7.257195 | 8.272723 | 2        | 1        | 8        | 7        | 6        | 7        | 7.442274  | 7.038856  | 7.290456  | 8.176735  | 8.290999  | 8.350436  |
| 0.0021 | 0.0093 | 3.0342 |      | noncod | ENST0000   |            |        | 11.193 | 48.340 |          |          | 12.21941 | 11.86258 |          |          | 55.77200 |          |           |           |           |           |           |           |
| 35416  | 62939  | 724    | down | ing    | 0512319    | intergenic |        | 28     | 546    | 3.720127 | 5.321478 | 1        | 9        | 9.497839 | 34.44534 | 7        | 54.80429 | 3.8770602 | 3.884255  | 3.399066  | 5.015753  | 5.560338  | 5.388342  |
| 3.2743 | 0.0003 | 2.0957 |      | noncod | ENST0000   |            |        | 783.70 | 2641.8 |          |          | 11.01951 |          | 733.7792 | 2476.601 | 2619.915 | 2828.978 |           |           |           |           |           |           |
| 8E-06  | 96799  | 307    | down | ing    | 0573141    | intergenic |        | 3313   | 319    | 9.95206  | 3        | 749.3286 | 4        | 868.0021 | 6        | 8        | 3        | 9.915541  | 9.984207  | 9.956432  | 11.061747 | 10.997589 | 10.999204 |
| 0.0043 | 0.0153 | 2.9961 |      | noncod | ENST0000   | natural    |        | 13.778 | 56.544 |          |          | 17.42568 |          | 14.52895 |          | 62.33919 |          |           |           |           |           |           |           |
| 15404  | 98347  | 442    | down | ing    | 0578500    | antisense  | GINS4  | 501    | 105    | 3.969958 | 5.553065 | 8        | 9.380858 | 8        | 43.0823  | 5        | 64.21082 | 4.386653  | 3.5347545 | 3.9884653 | 5.330579  | 5.714     | 5.614615  |
| 1.1533 | 0.0003 | 2.8488 |      | noncod | ENST0000   |            |        | 443.26 | 1978.6 |          |          | 10.61451 | 421.9067 | 400.3393 | 1761.529 | 2193.961 |          |           |           |           |           |           |           |
| 4E-06  | 32251  | 118    | down | ing    | 0430893    | intergenic |        | 041    | 075    | 9.10415  | 1        | 7        | 6        | 507.5351 | 3        | 1980.332 | 2        | 9.068751  | 9.085131  | 9.158569  | 10.594982 | 10.603522 | 10.645028 |
| 1.0687 | 0.0005 | 2.5712 |      | noncod | ENST0000   | bidirectio | TMEM16 | 82.054 | 306.39 |          |          |          |          | 269.7698 | 318.1291 | 331.2972 |          |           |           |           |           |           |           |
| 1E-05  | 61762  | 331    | down | ing    | 0504769    | nal        | 1B     | 03     | 8773   | 6.607828 | 7.970288 | 84.5767  | 75.55634 | 86.02905 | 7        | 8        | 7        | 6.686054  | 6.600971  | 6.536458  | 7.9297633 | 8.015123  | 7.965978  |
| 0.0005 | 0.0040 | 2.2489 |      | noncod |            | natural    |        | 19.541 | 61.928 |          |          |          |          | 22.75097 | 50.09335 | 77.35950 |          |           |           |           |           |           |           |
| 91721  | 62386  | 53     | down | ing    | NR_024052  | antisense  | TRIM39 | 601    | 069    | 4.512688 | 5.681941 | 18.65754 | 17.21629 | 3        | 3        | 58.33135 | 5        | 4.4835734 | 4.4321346 | 4.6223555 | 5.5404935 | 5.620627  | 5.8847036 |
| 0.0051 | 0.0174 | 2.6665 |      | noncod | TCONS_00   |            |        | 6.1027 | 21.477 |          |          | 4.999999 | 7.481693 |          |          | 20.81115 | 22.85828 |           |           |           |           |           |           |
| 10297  | 00192  | 938    | down | ing    | 020994     | intergenic |        | 59     | 648    | 2.769705 | 4.184703 | 5        | 7        | 5.826585 | 20.76351 | 2        | 2        | 2.3494408 | 3.2030466 | 2.7566285 | 4.3050895 | 4.15405   | 4.0949707 |
| 0.0002 | 0.0023 | 2.4522 |      | noncod | ENST0000   |            |        | 18.274 | 62.222 |          |          |          |          |          | 57.69577 | 60.25476 |          |           |           |           |           |           |           |
| 38128  | 26737  | 556    | down | ing    | 0440645    | intergenic |        | 64     | 206    | 4.412244 | 5.706354 | 15.6341  | 17.10225 | 22.08757 | 4        | 5        | 68.71608 | 4.2326536 | 4.420596  | 4.583483  | 5.7425237 | 5.6653476 | 5.7111893 |
| 0.0080 | 0.0244 | 2.1883 |      | noncod |            | sense-ove  |        | 22.890 | 68.526 |          |          | 28.86055 | 16.38789 | 23.42299 |          | 71.40427 |          |           |           |           |           |           |           |
| 87814  | 9296   | 95     | down | ing    | NR_028463  | rlapping   | ATXN3  | 482    | 151    | 4.715799 | 5.845672 | 2        | 6        | 7        | 64.59782 | 4        | 69.57636 | 5.1279774 | 4.358985  | 4.6604333 | 5.9026117 | 5.9034305 | 5.730973  |
| 0.0080 | 0.0244 | 2.1883 |      | noncod |            | sense-ove  |        | 22.890 | 68.526 |          |          | 28.86055 | 16.38789 | 23.42299 |          | 71.40427 |          |           |           |           |           |           |           |
| 87814  | 9296   | 95     | down | ing    | NR_028463  | rlapping   | ATXN3  | 482    | 151    | 4.715799 | 5.845672 | 2        | 6        | 7        | 64.59782 | 4        | 69.57636 | 5.1279774 | 4.358985  | 4.6604333 | 5.9026117 | 5.9034305 | 5.730973  |
| 0.0080 | 0.0244 | 2.1883 |      | noncod |            | sense-ove  |        | 22.890 | 68.526 |          |          | 28.86055 | 16.38789 | 23.42299 |          | 71.40427 |          |           |           |           |           |           |           |
| 87814  | 9296   | 95     | down | ing    | NR_028463  | rlapping   | ATXN3  | 482    | 151    | 4.715799 | 5.845672 | 2        | 6        | 7        | 64.59782 | 4        | 69.57636 | 5.1279774 | 4.358985  | 4.6604333 | 5.9026117 | 5.9034305 | 5.730973  |
| 0.0080 | 0.0244 | 2.1883 |      | noncod |            | sense-ove  |        | 22.890 | 68.526 |          |          | 28.86055 | 16.38789 | 23.42299 |          | 71.40427 |          |           |           |           |           |           |           |
| 87814  | 9296   | 95     | down | ing    | NR_028463  | rlapping   | ATXN3  | 482    | 151    | 4.715799 | 5.845672 | 2        | 6        | 7        | 64.59782 | 4        | 69.57636 | 5.1279774 | 4.358985  | 4.6604333 | 5.9026117 | 5.9034305 | 5.730973  |
| 0.0080 | 0.0244 | 2.1883 |      | noncod |            | sense-ove  |        | 22.890 | 68.526 |          |          | 28.86055 | 16.38789 | 23.42299 |          | 71.40427 |          |           |           |           |           |           |           |
| 87814  | 9296   | 95     | down | ing    | NR_028463  | rlapping   | ATXN3  | 482    | 151    | 4.715799 | 5.845672 | 2        | 6        | 7        | 64.59782 | 4        | 69.57636 | 5.1279774 | 4.358985  | 4.6604333 | 5.9026117 | 5.9034305 | 5.730973  |
| 0.0080 | 0.0244 | 2.1883 |      | noncod |            | sense-ove  |        | 22.890 | 68.526 |          |          | 28.86055 | 16.38789 | 23.42299 |          | 71.40427 |          |           |           |           |           |           |           |
| 87814  | 9296   | 95     | down | ing    | NR_028463  | rlapping   | ATXN3  | 482    | 151    | 4.715799 | 5.845672 | 2        | 6        | 7        | 64.59782 | 4        | 69.57636 | 5.1279774 | 4.358985  | 4.6604333 | 5.9026117 | 5.9034305 | 5.730973  |
| 0.0080 | 0.0244 | 2.1883 |      | noncod |            | sense-ove  |        | 22.890 | 68.526 |          |          | 28.86055 | 16.38789 | 23.42299 |          | 71.40427 |          |           |           |           |           |           |           |
| 87814  | 9296   | 95     | down | ing    | NR_028463  | rlapping   | ATXN3  | 482    | 151    | 4.715799 | 5.845672 | 2        | 6        | 7        | 64.59782 | 4        | 69.57636 | 5.1279774 | 4.358985  | 4.6604333 | 5.9026117 | 5.9034305 | 5.730973  |
| 0.0080 | 0.0244 | 2.1883 |      | noncod |            | sense-ove  |        | 22.890 | 68.526 |          |          | 28.86055 | 16.38789 | 23.42299 |          | 71.40427 |          |           |           |           |           |           |           |
| 87814  | 9296   | 95     | down | ing    | NR_028463  | rlapping   | ATXN3  | 482    | 151    | 4.715799 | 5.845672 | 2        | 6        | 7        | 64.59782 | 4        | 69.57636 | 5.1279774 | 4.358985  | 4.6604333 | 5.9026117 | 5.9034305 | 5.730973  |
| 0.0080 | 0.0244 | 2.1883 |      | noncod |            | sense-ove  |        | 22.890 | 68.526 |          |          | 28.86055 | 16.38789 | 23.42299 |          | 71.40427 |          |           |           |           |           |           |           |
| 87814  | 9296   | 95     | down | ing    | NR_028463  | rlapping   | ATXN3  | 482    | 151    | 4.715799 | 5.845672 | 2        | 6        | 7        | 64.59782 | 4        | 69.57636 | 5.1279774 | 4.358985  | 4.6604333 | 5.9026117 | 5.9034305 | 5.730973  |

|           |        |        |      |        |           | exon       |         |        |        |          |          |          |          |          |          |          |          |           |           |           |           |           |           |  |
|-----------|--------|--------|------|--------|-----------|------------|---------|--------|--------|----------|----------|----------|----------|----------|----------|----------|----------|-----------|-----------|-----------|-----------|-----------|-----------|--|
| 0.0080    | 0.0244 | 2.1883 |      | noncod |           | sense-ove  | 22.890  | 68.526 |        | 28.86055 | 16.38789 | 23.42299 |          | 71.40427 |          |          |          |           |           |           |           |           |           |  |
| 87814     | 9296   | 95     | down | ing    | NR_028463 | rlapping   | ATXN3   | 482    | 151    | 4.715799 | 5.845672 | 2        | 6        | 7        | 64.59782 | 4        | 69.57636 | 5.1279774 | 4.358985  | 4.6604333 | 5.9026117 | 5.9034305 | 5.730973  |  |
| 5.2284    | 0.0003 | 2.1601 |      | noncod |           | natural    | FAM211  | 218.83 | 720.69 |          |          | 212.0680 | 205.4084 |          | 643.6482 |          | 778.9988 |           |           |           |           |           |           |  |
| 8E-07     | 32251  | 513    | down | ing    | NR_027168 | antisense  | A       | 4927   | 1197   | 8.057036 | 9.168169 | 5        | 3        | 239.0283 | 5        | 739.4265 | 4        | 8.038513  | 8.085703  | 8.046893  | 9.146422  | 9.189331  | 9.168753  |  |
| 5.2284    | 0.0003 | 2.1601 |      | noncod |           | natural    | FAM211  | 218.83 | 720.69 |          |          | 212.0680 | 205.4084 |          | 643.6482 |          | 778.9988 |           |           |           |           |           |           |  |
| 8E-07     | 32251  | 513    | down | ing    | NR_027168 | antisense  | A       | 4927   | 1197   | 8.057036 | 9.168169 | 5        | 3        | 239.0283 | 5        | 739.4265 | 4        | 8.038513  | 8.085703  | 8.046893  | 9.146422  | 9.189331  | 9.168753  |  |
| 0.0112    | 0.0313 | 2.2623 |      | noncod | TCONS_00  |            |         | 8.7886 | 26.444 |          |          | 7.777993 | 6.302048 |          | 26.66202 |          | 25.45404 |           |           |           |           |           |           |  |
| 5164      | 04701  | 324    | down | ing    | 006034    | intergenic |         | 67     | 291    | 3.306279 | 4.484089 | 7        | 7        | 12.28596 | 4        | 27.2168  | 8        | 3.2201793 | 2.9457877 | 3.7528687 | 4.6565514 | 4.53751   | 4.258207  |  |
| 0.0023    | 0.0099 | 2.3171 |      | noncod | ENST0000  | bidirectio |         | 8.1484 | 26.072 |          |          |          |          |          | 24.45214 | 28.35301 | 25.41111 |           |           |           |           |           |           |  |
| 25483     | 24399  | 631    | down | ing    | 0433521   | nal        | ACADM   | 1      | 095    | 3.249527 | 4.461886 | 9.345493 | 6.493676 | 8.606061 | 8        | 8        | 8        | 3.4833403 | 2.9943097 | 3.2709303 | 4.53735   | 4.5928864 | 4.2554226 |  |
| 0.0023    | 0.0099 | 2.3171 |      | noncod | ENST0000  | bidirectio |         | 8.1484 | 26.072 |          |          |          |          |          | 24.45214 | 28.35301 | 25.41111 |           |           |           |           |           |           |  |
| 25483     | 24399  | 631    | down | ing    | 0433521   | nal        | ACADM   | 1      | 095    | 3.249527 | 4.461886 | 9.345493 | 6.493676 | 8.606061 | 8        | 8        | 8        | 3.4833403 | 2.9943097 | 3.2709303 | 4.53735   | 4.5928864 | 4.2554226 |  |
| 0.0003    | 0.0028 | 5.2541 |      | noncod |           | bidirectio |         | 23.058 | 171.58 |          |          | 21.57130 | 27.67350 | 19.93175 |          |          | 200.1888 |           |           |           |           |           |           |  |
| 31133     | 57402  | 4      | down | ing    | NR_036502 | nal        | PRKCQ   | 854    | 4753   | 4.753336 | 7.146791 | 8        | 4        | 1        | 151.8787 | 162.6867 | 6        | 4.6975617 | 5.1278934 | 4.434553  | 7.1163325 | 7.074276  | 7.2497635 |  |
| 0.0003    | 0.0028 | 5.2541 |      | noncod |           | bidirectio |         | 23.058 | 171.58 |          |          | 21.57130 | 27.67350 | 19.93175 |          |          | 200.1888 |           |           |           |           |           |           |  |
| 31133     | 57402  | 4      | down | ing    | NR_036502 | nal        | PRKCQ   | 854    | 4753   | 4.753336 | 7.146791 | 8        | 4        | 1        | 151.8787 | 162.6867 | 6        | 4.6975617 | 5.1278934 | 4.434553  | 7.1163325 | 7.074276  | 7.2497635 |  |
| 2.2446    | 0.0007 | 2.1282 |      | noncod | TCONS_00  |            |         | 58.363 | 177.64 |          |          |          |          |          | 53.81603 | 170.6211 | 170.1408 | 192.1698  |           |           |           |           |           |  |
| 6E-05     | 52542  | 864    | down | ing    | 028205    | intergenic |         | 565    | 3933   | 6.113489 | 7.203182 | 55.321   | 6        | 65.95366 | 7        | 1        | 2        | 6.0763764 | 6.107018  | 6.1570735 | 7.2787194 | 7.133854  | 7.1969714 |  |
| 0.0011    | 0.0062 | 3.8767 |      | noncod | ENST0000  | natural    |         | 5.8440 | 30.558 |          |          |          |          |          | 4.999999 |          | 27.30387 | 40.74388  |           |           |           |           |           |  |
| 75064     | 33438  | 331    | down | ing    | 0425754   | antisense  | LRRC7   | 26     | 87     | 2.706359 | 4.661201 | 6.579924 | 5        | 5.952153 | 23.62885 | 5        | 5        | 2.9804106 | 2.3528795 | 2.785788  | 4.4878383 | 4.541643  | 4.954121  |  |
| 0.0044    | 0.0157 | 3.0593 |      | noncod | ENST0000  |            |         | 8.6139 | 37.685 |          |          |          |          |          | 7.299819 | 25.06395 |          |           |           |           |           |           |           |  |
| 5182      | 53664  | 509    | down | ing    | 0559505   | intergenic |         | 88     | 617    | 3.333201 | 4.946426 | 10.91351 | 7.628636 | 5        | 1        | 38.25628 | 49.73662 | 3.7115679 | 3.2333481 | 3.0546856 | 4.5714703 | 5.020121  | 5.247687  |  |
| 7.1627    | 0.0004 | 2.2036 |      | noncod | ENST0000  |            |         | 64.681 | 206.13 |          |          |          |          |          | 62.84702 |          | 181.6254 | 204.2542  | 232.5402  |           |           |           |           |  |
| 6E-06     | 9593   | 802    | down | ing    | 0459633   | intergenic |         | 388    | 9963   | 6.265872 | 7.405787 | 3        | 61.57173 | 69.62541 | 1        | 1        | 7        | 6.254113  | 6.3111615 | 6.2323427 | 7.3668504 | 7.386773  | 7.4637384 |  |
| 8.0467    | 0.0012 | 2.0082 |      | noncod | ENST0000  | natural    |         | 59.822 | 173.15 |          |          |          |          |          | 59.12005 |          | 149.6550 | 175.0552  | 194.7667  |           |           |           |           |  |
| 8E-05     | 95149  | 222    | down | ing    | 0418945   | antisense  | PNISR   | 249    | 9007   | 6.154594 | 7.160513 | 55.52925 | 6        | 64.81744 | 1        | 4        | 7        | 6.0821896 | 6.2518425 | 6.129749  | 7.0957704 | 7.1716237 | 7.2141438 |  |
| 8.0467    | 0.0012 | 2.0082 |      | noncod | ENST0000  | natural    |         | 59.822 | 173.15 |          |          |          |          |          | 59.12005 |          | 149.6550 | 175.0552  | 194.7667  |           |           |           |           |  |
| 8E-05     | 95149  | 222    | down | ing    | 0418945   | antisense  | PNISR   | 249    | 9007   | 6.154594 | 7.160513 | 55.52925 | 6        | 64.81744 | 1        | 4        | 7        | 6.0821896 | 6.2518425 | 6.129749  | 7.0957704 | 7.1716237 | 7.2141438 |  |
| 0.0032    | 0.0127 | 2.2926 |      | noncod | ENST0000  |            |         | 9.2438 | 29.197 |          |          |          |          |          | 11.91554 |          | 25.04650 | 36.63868  |           |           |           |           |           |  |
| 90055     | 0274   | 716    | down | ing    | 0499203   | intergenic |         | 92     | 019    | 3.414584 | 4.611614 | 7.60606  | 8.210066 | 9        | 25.90587 | 3        | 3        | 3.1879692 | 3.3403382 | 3.7154458 | 4.617491  | 4.420505  | 4.7968464 |  |
| 2.6337    | 0.0003 | 4.7138 |      | noncod | ENST0000  | natural    | HIST2H3 | 785.29 | 5988.0 |          |          | 12.18672 |          |          | 723.1087 | 914.3793 | 5618.145 | 6074.532  | 6271.610  |           |           |           |           |  |
| E-06      | 67353  | 734    | down | ing    | 0435113   | antisense  | PS2     | 1763   | 962    | 9.949813 | 6        | 718.3872 | 6        | 3        | 5        | 7        | 4        | 9.857149  | 9.960411  | 10.03188  | 12.229614 | 12.194796 | 12.135769 |  |
| 0.0035    | 0.0132 | 2.1137 |      | noncod |           | natural    | CXorf40 | 30.064 | 89.463 |          |          |          |          |          | 35.39581 |          | 29.23137 | 70.20312  | 98.81093  |           |           |           |           |  |
| 12997     | 99727  | 897    | down | ing    | NR_027456 | antisense  | B       | 653    | 06     | 5.136035 | 6.215867 | 3        | 25.56677 | 5        | 5        | 6        | 99.37512 | 5.4212866 | 5.010571  | 4.9762464 | 6.02462   | 6.368649  | 6.2543306 |  |
| 2.4179    | 0.0003 | 2.1297 |      | noncod | ENST0000  |            |         | 65.323 | 200.11 |          |          |          |          |          | 65.20112 |          | 72.46773 | 184.1462  | 202.6723  |           |           |           |           |  |
| 7E-06     | 67353  | 106    | down | ing    | 0564464   | intergenic |         | 207    | 5563   | 6.275179 | 7.365837 | 6        | 58.30076 | 5        | 6        | 3        | 213.5281 | 6.3059773 | 6.229431  | 6.290129  | 7.385109  | 7.3751526 | 7.337248  |  |
| 0.0093    | 0.0273 | 3.1887 |      | noncod | ENST0000  | intronic   |         | 7.6775 | 30.984 |          |          |          |          |          | 4.999999 | 10.02650 |          | 26.56889  | 37.78994  |           |           |           |           |  |
| 70682     | 62391  | 728    | down | ing    | 0429588   | antisense  | CLDN14  | 38     | 823    | 3.026343 | 4.699344 | 8.006106 | 5        | 9        | 28.59563 | 2        | 8        | 3.2575603 | 2.3528795 | 3.4685895 | 4.7529645 | 4.504842  | 4.8402267 |  |
| 0.0093    | 0.0273 | 3.1887 |      | noncod | ENST0000  | intronic   |         | 7.6775 | 30.984 |          |          |          |          |          | 4.999999 | 10.02650 |          | 26.56889  | 37.78994  |           |           |           |           |  |
| 70682     | 62391  | 728    | down | ing    | 0429588   | antisense  | CLDN14  | 38     | 823    | 3.026343 | 4.699344 | 8.006106 | 5        | 9        | 28.59563 | 2        | 8        | 3.2575603 | 2.3528795 | 3.4685895 | 4.7529645 | 4.504842  | 4.8402267 |  |
| 0.0093    | 0.0273 | 3.1887 |      | noncod | ENST0000  | intronic   |         | 7.6775 | 30.984 |          |          |          |          |          | 4.999999 | 10.02650 |          | 26.56889  | 37.78994  |           |           |           |           |  |
| 70682     | 62391  | 728    | down | ing    | 0429588   | antisense  | CLDN14  | 38     | 823    | 3.026343 | 4.699344 | 8.006106 | 5        | 9        | 28.59563 | 2        | 8        | 3.2575603 | 2.3528795 | 3.4685895 | 4.7529645 | 4.504842  | 4.8402267 |  |
| 0.0093    | 0.0273 | 3.1887 |      | noncod | ENST0000  | intronic   |         | 7.6775 | 30.984 |          |          |          |          |          | 4.999999 | 10.02650 |          | 26.56889  | 37.78994  |           |           |           |           |  |
| 70682     | 62391  | 728    | down | ing    | 0429588   | antisense  | CLDN14  | 38     | 823    | 3.026343 | 4.699344 | 8.006106 | 5        | 9        | 28.59563 | 2        | 8        | 3.2575603 | 2.3528795 | 3.4685895 | 4.7529645 | 4.504842  | 4.8402267 |  |
| 1.4131    | 0.0003 | 4.1591 |      | noncod | ENST0000  | intronic   |         | 25.155 |        |          |          |          |          |          | 4.999999 | 4.999999 | 4.999999 | 20.98671  | 29.44107  |           |           |           |           |  |
| 3E-06     | 32251  | 83     | down | ing    | 0583956   | antisense  | SLC46A1 | 5      | 75     | 2.350054 | 4.406354 | 5        | 5        | 5        | 7        | 25.03946 | 2        | 2.3494408 | 2.3528795 | 2.3478405 | 4.321988  | 4.419878  | 4.4771953 |  |
| 1.4131    | 0.0003 | 4.1591 |      | noncod | ENST0000  | natural    |         | 25.155 |        |          |          |          |          |          | 4.999999 | 4.999999 | 4.999999 | 20.98671  | 29.44107  |           |           |           |           |  |
| 3E-06     | 32251  | 83     | down | ing    | 0583956   | antisense  | SLC46A1 | 5      | 75     | 2.350054 | 4.406354 | 5        | 5        | 5        | 7        | 25.03946 | 2        | 2.3494408 | 2.3528795 | 2.3478405 | 4.321988  | 4.419878  | 4.4771953 |  |
| 0.0015    | 0.0076 | 5.8846 |      | noncod | TCONS_00  |            |         | 6.0692 | 44.928 |          |          |          |          |          | 4.999999 |          | 4.999999 | 47.00655  | 50.28775  |           |           |           |           |  |
| 79647     | 01788  | 63     | down | ing    | 005211    | intergenic |         | 67     | 394    | 2.679043 | 5.236003 | 5        | 8.207802 | 5        | 37.49087 | 4        | 8        | 2.3494408 | 3.339847  | 2.3478405 | 5.1318183 | 5.3151674 | 5.261022  |  |
| 8.682E-05 | 58431  | 576    | down | ing    | 014652    | intergenic |         | 85.678 | 252.81 |          |          |          |          |          | 84.55830 |          | 227.3469 | 291.1449  |           |           |           |           |           |  |
| 0.0033    | 0.0129 | 2.2360 |      | noncod | ENST0000  | bidirectio |         | 10.756 | 33.585 |          |          |          |          |          | 12.40594 | 10.90885 | 29.35173 | 29.59732  | 41.80647  |           |           |           |           |  |
| 75267     | 31147  | 233    | down | ing    | 0519655   | nal        | RIPK2   | 675    | 178    | 3.652464 | 4.8134   | 8.955218 | 8        | 8        | 4        | 6        | 3        | 3.414297  | 3.952275  | 3.5908213 | 4.7901278 | 4.6563168 | 4.9937544 |  |
| 0.0267    | 0.0602 | 2.2544 |      | noncod | ENST0000  | intronic   |         | 11.774 | 34.749 |          |          |          |          |          | 6.620833 | 14.33925 |          | 37.67486  |           |           |           |           |           |  |
| 32794     | 77805  | 865    | down | ing    | 0424434   | antisense  | GNAS    | 078    | 851    | 3.701328 | 4.874127 | 14.36215 | 4        | 1        | 30.31027 | 36.26442 | 2        | 4.1095295 | 3.0246658 | 3.9697883 | 4.8384266 | 4.9481087 | 4.835845  |  |
| 0.0267    | 0.0602 | 2.2544 |      | noncod | ENST0000  | intronic   |         | 11.774 | 34.749 |          |          |          |          |          | 6.620833 | 14.33925 |          | 37.67486  |           |           |           |           |           |  |
| 32794     | 77805  | 865    | down | ing    | 0424434   | antisense  | GNAS    | 078    | 851    | 3.701328 | 4.874127 | 14.36215 | 4        | 1        | 30.31027 | 36.26442 | 2        | 4.1095295 | 3.0246658 | 3.9697883 | 4.8384266 | 4.9481087 | 4.835845  |  |
| 0.        |        |        |      |        |           |            |         |        |        |          |          |          |          |          |          |          |          |           |           |           |           |           |           |  |





















|        |        |        |      |        |            |            |          |        |        |          |          |          |          |          |          |          |          |           |           |           |           |           |           |
|--------|--------|--------|------|--------|------------|------------|----------|--------|--------|----------|----------|----------|----------|----------|----------|----------|----------|-----------|-----------|-----------|-----------|-----------|-----------|
| 0.0009 | 0.0054 | 2.0458 |      | noncod | ENST0000   | natural    | C10orf13 | 35.453 | 102.86 |          |          |          |          |          | 117.2964 | 101.3341 |          |           |           |           |           |           |           |
| 58501  | 79222  | 403    | down | ing    | 0528844    | antisense  | 7        | 473    | 0137   | 5.391231 | 6.423925 | 33.6398  | 35.95426 | 36.76636 | 89.94975 | 7        | 9        | 5.345747  | 5.518859  | 5.309088  | 6.3755193 | 6.6151614 | 6.281094  |
| 0.0009 | 0.0054 | 2.0458 |      | noncod | ENST0000   | natural    | C10orf13 | 35.453 | 102.86 |          |          |          |          |          | 117.2964 | 101.3341 |          |           |           |           |           |           |           |
| 58501  | 79222  | 403    | down | ing    | 0528844    | antisense  | 7        | 473    | 0137   | 5.391231 | 6.423925 | 33.6398  | 35.95426 | 36.76636 | 89.94975 | 7        | 9        | 5.345747  | 5.518859  | 5.309088  | 6.3755193 | 6.6151614 | 6.281094  |
| 0.0149 | 0.0388 | 4.3995 |      | noncod | ENST0000   | natural    | KANSL1   | 14.721 | 81.727 |          |          |          |          |          |          |          |          | 93.70344  |           |           |           |           |           |
| 82972  | 83562  | 251    | down | ing    | 0452057    | antisense  | L        | 66     | 068    | 3.9578   | 6.095148 | 4        | 4        | 14.48263 | 71.37206 | 80.1057  | 5        | 3.0417259 | 4.8470635 | 3.9846098 | 6.04601   | 6.071122  | 6.1683106 |
| 2.6456 | 0.0008 | 5.0853 |      | noncod | ENST0000   | natural    | CABLES   | 52.910 | 391.51 |          |          |          |          |          |          |          |          | 380.1045  | 429.5011  |           |           |           |           |
| E-05   | 11796  | 971    | down | ing    | 0585184    | antisense  | 1        | 041    | 8283   | 5.973439 | 8.3198   | 3        | 56.61057 | 54.72691 | 364.9492 | 2        | 3        | 5.8553333 | 6.1826897 | 5.8822947 | 8.35217   | 8.270165  | 8.337064  |
| 2.6456 | 0.0008 | 5.0853 |      | noncod | ENST0000   | natural    | CABLES   | 52.910 | 391.51 |          |          |          |          |          |          |          |          | 380.1045  | 429.5011  |           |           |           |           |
| E-05   | 11796  | 971    | down | ing    | 0585184    | antisense  | 1        | 041    | 8283   | 5.973439 | 8.3198   | 3        | 56.61057 | 54.72691 | 364.9492 | 2        | 3        | 5.8553333 | 6.1826897 | 5.8822947 | 8.35217   | 8.270165  | 8.337064  |
| 2.6456 | 0.0008 | 5.0853 |      | noncod | ENST0000   | natural    | CABLES   | 52.910 | 391.51 |          |          |          |          |          |          |          |          | 380.1045  | 429.5011  |           |           |           |           |
| E-05   | 11796  | 971    | down | ing    | 0585184    | antisense  | 1        | 041    | 8283   | 5.973439 | 8.3198   | 3        | 56.61057 | 54.72691 | 364.9492 | 2        | 3        | 5.8553333 | 6.1826897 | 5.8822947 | 8.35217   | 8.270165  | 8.337064  |
| 0.0002 | 0.0024 | 3.9532 |      | noncod |            | sense-ove  |          | 26.722 | 146.45 |          |          |          | 20.94476 | 25.19449 | 34.02844 | 136.1067 | 140.8719 | 162.3770  |           |           |           |           |           |
| 55334  | 15391  | 779    | down | ing    | NR_036536  | rlapping   | MATR3    | 568    | 1887   | 4.948655 | 6.931704 | 5        | 2        | 6        | 2        | 3        | 1        | 4.653913  | 4.9912033 | 5.200848  | 6.9626994 | 6.873717  | 6.958696  |
| 0.0002 | 0.0024 | 3.9532 |      | noncod |            | sense-ove  |          | 26.722 | 146.45 |          |          |          | 20.94476 | 25.19449 | 34.02844 | 136.1067 | 140.8719 | 162.3770  |           |           |           |           |           |
| 55334  | 15391  | 779    | down | ing    | NR_036536  | rlapping   | MATR3    | 568    | 1887   | 4.948655 | 6.931704 | 5        | 2        | 6        | 2        | 3        | 1        | 4.653913  | 4.9912033 | 5.200848  | 6.9626994 | 6.873717  | 6.958696  |
| 4.2881 | 0.0004 | 2.7382 |      | noncod | ENST0000   |            |          | 85.319 | 340.35 |          |          |          |          |          | 94.56196 | 307.2654 | 336.8444 | 376.9679  |           |           |           |           |           |
| 9E-06  | 1588   | 055    | down | ing    | 0536487    | intergenic |          | 915    | 9303   | 6.663439 | 8.11667  | 79.36188 | 82.0359  | 6        | 7        | 8        | 6        | 6.5895205 | 6.7262864 | 6.67451   | 8.116226  | 8.092336  | 8.141447  |
| 0.0001 | 0.0020 | 5.3470 |      | noncod | ENST0000   | bidirectio |          | 26.539 | 202.12 |          |          |          | 24.51940 | 31.02590 | 24.07295 | 192.1294 | 192.5280 |           |           |           |           |           |           |
| 87769  | 27053  | 058    | down | ing    | 0414676    | nal        | SOX12    | 42     | 7163   | 4.961407 | 7.380138 | 2        | 6        | 2        | 3        | 6        | 221.724  | 4.883148  | 5.30101   | 4.700062  | 7.44548   | 7.3031387 | 7.391795  |
| 0.0001 | 0.0019 | 2.0935 |      | noncod |            | natural    |          | 282.35 | 911.25 |          |          |          | 251.0817 | 282.8200 | 313.1521 |          |          |           |           |           |           |           |           |
| 77772  | 74985  | 901    | down | ing    | uc001edd.3 | antisense  | SLC16A1  | 1333   | 3633   | 8.428255 | 9.494234 | 7        | 7        | 6        | 812.3746 | 916.6203 | 1004.766 | 8.289025  | 8.559913  | 8.435828  | 9.475567  | 9.487802  | 9.519334  |
| 0.0041 | 0.0150 | 2.0789 |      | noncod | ENST0000   | intronic   |          | 32.906 | 93.599 |          |          |          | 26.16383 | 27.95173 | 44.60445 |          |          | 93.43809  | 102.7101  |           |           |           |           |
| 76553  | 41242  | 742    | down | ing    | 0560280    | antisense  | RORA     | 676    | 175    | 5.235642 | 6.291514 | 7        | 3        | 8        | 84.64924 | 5        | 9        | 4.982148  | 5.1423497 | 5.582429  | 6.284144  | 6.289319  | 6.3010793 |
| 0.0041 | 0.0150 | 2.0789 |      | noncod | ENST0000   | intronic   |          | 32.906 | 93.599 |          |          |          | 26.16383 | 27.95173 | 44.60445 |          |          | 93.43809  | 102.7101  |           |           |           |           |
| 76553  | 41242  | 742    | down | ing    | 0560280    | antisense  | RORA     | 676    | 175    | 5.235642 | 6.291514 | 7        | 3        | 8        | 84.64924 | 5        | 9        | 4.982148  | 5.1423497 | 5.582429  | 6.284144  | 6.289319  | 6.3010793 |
| 0.0041 | 0.0150 | 2.0789 |      | noncod | ENST0000   | intronic   |          | 32.906 | 93.599 |          |          |          | 26.16383 | 27.95173 | 44.60445 |          |          | 93.43809  | 102.7101  |           |           |           |           |
| 76553  | 41242  | 742    | down | ing    | 0560280    | antisense  | RORA     | 676    | 175    | 5.235642 | 6.291514 | 7        | 3        | 8        | 84.64924 | 5        | 9        | 4.982148  | 5.1423497 | 5.582429  | 6.284144  | 6.289319  | 6.3010793 |
| 5.7150 | 0.0011 | 6.4684 |      | noncod |            |            |          | 20.916 | 192.69 |          |          |          | 23.54896 | 20.47711 |          | 185.1634 | 182.8885 | 210.0469  |           |           |           |           |           |
| 4E-05  | 11797  | 165    | down | ing    | uc010zan.1 | intergenic |          | 556    | 967    | 4.62005  | 7.313462 | 7        | 2        | 18.72359 | 7        | 7        | 7        | 4.826275  | 4.6876507 | 4.346224  | 7.395023  | 7.229826  | 7.3155384 |
| 1.5410 | 0.0003 | 8.3607 |      | noncod | TCONS_00   |            |          | 92.224 | 1165.3 |          |          |          | 91.29111 | 87.08095 |          | 1137.171 | 1084.489 | 1274.318  |           |           |           |           |           |
| 9E-06  | 36928  | 461    | down | ing    | 029753     | intergenic |          | 277    | 26367  | 6.781037 | 9.844669 | 5        | 6        | 98.30076 | 1        | 9        | 1        | 6.798129  | 6.8156223 | 6.7293606 | 9.947874  | 9.728054  | 9.858079  |
| 0.0015 | 0.0074 | 2.2980 |      | noncod |            |            |          | 23.951 | 75.793 |          |          |          | 24.89671 |          | 29.20426 |          |          | 83.80398  |           |           |           |           |           |
| 43055  | 57412  | 027    | down | ing    | uc010ady.1 | intergenic |          | 045    | 732    | 4.786455 | 5.986835 | 7        | 17.75215 | 8        | 67.5096  | 76.06761 | 6        | 4.906971  | 4.4772906 | 4.975102  | 5.96458   | 5.9966183 | 5.9993067 |
| 0.0395 | 0.0808 | 2.2415 |      | noncod |            |            |          | 8.2145 | 24.158 |          |          |          | 12.83890 | 5.446217 | 6.358431 | 21.91213 |          | 28.36043  |           |           |           |           |           |
| 31805  | 77296  | 81     | down | ing    | NR_024429  | intergenic |          | 19     | 509    | 3.185505 | 4.350021 | 9        | 5        | 3        | 4        | 22.20296 | 2        | 3.9479108 | 2.734554  | 2.874049  | 4.380165  | 4.248934  | 4.4209647 |
| 2.9603 | 0.0008 | 2.6059 |      | noncod | ENST0000   |            |          | 42.230 | 156.96 |          |          |          | 40.38313 |          | 44.56879 | 148.9698 | 148.3158 | 173.6048  |           |           |           |           |           |
| E-05   | 46163  | 711    | down | ing    | 0464115    | intergenic |          | 962    | 3517   | 5.646259 | 7.02808  | 3        | 41.74096 | 4        | 8        | 3        | 4        | 5.617246  | 5.740179  | 5.581352  | 7.089458  | 6.9421153 | 7.052667  |
| 1.0486 | 0.0005 | 2.2316 |      | noncod |            | natural    |          | 350.72 | 1226.2 |          |          |          | 360.4580 | 310.1046 | 381.6085 | 1090.826 | 1268.566 | 1319.393  |           |           |           |           |           |
| 7E-05  | 59979  | 07     | down | ing    | NR_003138  | antisense  | GLRX5    | 3753   | 62067  | 8.752571 | 9.910654 | 7        | 4        | 5        | 3        | 8        | 1        | 8.828341  | 8.698169  | 8.731203  | 9.886253  | 9.940674  | 9.905035  |
| 0.0001 | 0.0015 | 2.4448 |      | noncod |            |            |          | 425.18 | 1629.8 |          | 10.32583 |          |          | 406.6515 | 496.5237 | 1414.316 | 1678.319 | 1796.946  |           |           |           |           |           |
| 11924  | 34055  | 862    | down | ing    | NR_024397  | intergenic |          | 2273   | 60833  | 9.036069 | 7        | 372.3715 | 5        | 7        | 2        | 8        | 5        | 8.875593  | 9.10768   | 9.124935  | 10.26837  | 10.352867 | 10.356273 |
| 0.0174 | 0.0434 | 3.0516 |      | noncod | ENST0000   |            |          | 8.1516 | 31.449 |          |          |          | 4.999999 | 10.56810 |          | 29.71766 |          |           |           |           |           |           |           |
| 3489   | 58591  | 266    | down | ing    | 0455355    |            |          | 91     | 13     | 3.125707 | 4.735285 | 5        | 1        | 8.886973 | 9        | 32.89787 | 31.73185 | 2.3494408 | 3.7151432 | 3.3125367 | 4.8078938 | 4.81164   | 4.5863223 |
| 0.0410 | 0.0831 | 3.0967 |      | noncod | ENST0000   | bidirectio |          | 10.894 | 39.781 |          |          |          | 11.93241 | 4.999999 | 15.75080 |          |          | 48.08685  |           |           |           |           |           |
| 12027  | 72593  | 648    | down | ing    | 0412856    | nal        | SEPT7    | 407    | 669    | 3.430763 | 5.061525 | 9        | 5        | 1        | 34.71117 | 36.54698 | 7        | 3.8428216 | 2.3528795 | 4.0965877 | 5.02723   | 4.9598103 | 5.197534  |
| 0.0410 | 0.0831 | 3.0967 |      | noncod | ENST0000   | bidirectio |          | 10.894 | 39.781 |          |          |          | 11.93241 | 4.999999 | 15.75080 |          |          | 48.08685  |           |           |           |           |           |
| 12027  | 72593  | 648    | down | ing    | 0412856    | nal        | SEPT7    | 407    | 669    | 3.430763 | 5.061525 | 9        | 5        | 1        | 34.71117 | 36.54698 | 7        | 3.8428216 | 2.3528795 | 4.0965877 | 5.02723   | 4.9598103 | 5.197534  |
| 0.0410 | 0.0831 | 3.0967 |      | noncod | ENST0000   | bidirectio |          | 10.894 | 39.781 |          |          |          | 11.93241 | 4.999999 | 15.75080 |          |          | 48.08685  |           |           |           |           |           |
| 12027  | 72593  | 648    | down | ing    | 0412856    | nal        | SEPT7    | 407    | 669    | 3.430763 | 5.061525 | 9        | 5        | 1        | 34.71117 | 36.54698 | 7        | 3.8428216 | 2.3528795 | 4.0965877 | 5.02723   | 4.9598103 | 5.197534  |
| 1.5416 | 0.0006 | 3.7686 |      | noncod | ENST0000   | sense-ove  |          | 109.47 | 618.16 |          |          |          | 108.5079 | 100.3751 | 119.5472 |          |          | 714.6799  |           |           |           |           |           |
| 1E-05  | 62721  | 37     | down | ing    | 0432513    | rlapping   | SASH3    | 6747   | 551    | 7.034336 | 8.948379 | 04       | 1        | 26       | 581.6685 | 558.1481 | 3        | 7.053011  | 7.022969  | 7.0270295 | 9.003476  | 8.797667  | 9.043995  |
| 0.0046 | 0.0162 | 2.4750 |      | noncod | ENST0000   | intronic   |          | 14.498 | 50.135 |          |          |          | 11.25606 |          |          | 44.17826 |          |           |           |           |           |           |           |
| 41345  | 59917  | 797    | down | ing    | 0576956    | antisense  | PDE7B    | 896    | 988    | 4.063619 | 5.371094 | 9        | 14.00233 | 18.23829 | 5        | 40.20433 | 66.02537 | 3.7587986 | 4.1286163 | 4.3034425 | 5.367836  | 5.0903034 | 5.655143  |
| 0.0001 | 0.0014 | 2.9010 |      | noncod | ENST0000   |            |          | 97.104 | 413.45 |          |          |          |          |          |          | 349.3617 | 433.9482 | 457.0494  |           |           |           |           |           |
| 0188   | 66171  | 296    | down | ing    | 0458422    | intergenic |          | 663    | 3157   | 6.851774 | 8.388339 | 84.72392 | 97.27057 | 109.3195 | 6        | 7        | 4        | 6.688924  | 6.9778214 | 6.8885756 | 8.288466  | 8.453479  | 8.423071  |
| 0.0001 | 0.0016 | 2.0633 |      | noncod |            |            |          | 369.82 | 1190.7 |          |          |          | 334.4935 | 360.4230 | 414.5559 |          |          | 1168.488  | 1270.054  |           |           |           |           |
| 25876  | 1124   | 578    | down | ing    | uc010vhg.2 | intergenic |          | 4187   | 893    | 8.83253  | 9.877524 | 6        | 3        | 7        | 1133.825 | 5        | 4        | 8.712159  | 8.923827  | 8.861605  | 9.944113  | 9.835437  | 9.853023  |
| 0.0001 | 0.0019 | 2.7921 |      | noncod | ENST0000   | intronic   |          | 25.132 | 97.894 |          |          |          |          |          |          |          |          |           |           |           |           |           |           |



















| rlapping |        |        |      |        |            |            |          |        |          |          |          |          |          |          |          |          |           |           |           |           |            |           |           |
|----------|--------|--------|------|--------|------------|------------|----------|--------|----------|----------|----------|----------|----------|----------|----------|----------|-----------|-----------|-----------|-----------|------------|-----------|-----------|
| 0.0010   | 0.0057 | 2.6118 |      | noncod | ENST0000   |            | 29.096   | 105.91 |          |          | 23.99125 | 28.32860 | 97.38994 | 101.4265 | 118.9244 |          |           |           |           |           |            |           |           |
| 22011    | 07123  | 009    | down | ing    | 0565095    | intergenic | 666      | 365    | 5.085165 | 6.47021  | 34.97013 | 9        | 8        | 6        | 75       | 3        | 5.403021  | 4.9244313 | 4.928043  | 6.486603  | 6.411656   | 6.512371  |           |
| 2.9698   | 0.0008 | 2.6826 |      | noncod |            | natural    | 58.677   | 227.43 |          |          | 59.09413 | 56.73642 | 60.20153 | 213.6976 | 216.0012 | 252.6004 |           |           |           |           |            |           |           |
| 5E-05    | 46163  | 274    | down | ing    | NR_040677  | antisense  | SIAH1    | 364    | 31       | 6.123808 | 7.547454 | 5        | 3        | 4        | 3        | 2        | 5         | 6.1639423 | 6.186526  | 6.0209546 | 7.5977283  | 7.4617257 | 7.582909  |
| 2.9698   | 0.0008 | 2.6826 |      | noncod |            | natural    | 58.677   | 227.43 |          |          | 59.09413 | 56.73642 | 60.20153 | 213.6976 | 216.0012 | 252.6004 |           |           |           |           |            |           |           |
| 5E-05    | 46163  | 274    | down | ing    | NR_040677  | antisense  | SIAH1    | 364    | 31       | 6.123808 | 7.547454 | 5        | 3        | 4        | 3        | 2        | 5         | 6.1639423 | 6.186526  | 6.0209546 | 7.5977283  | 7.4617257 | 7.582909  |
| 7.5833   | 0.0012 | 2.4433 |      | noncod | ENST0000   | natural    | 69.018   | 242.97 |          |          | 62.52474 |          |          |          | 242.2428 | 263.7860 |           |           |           |           |            |           |           |
| 7E-05    | 6185   | 074    | down | ing    | 0551187    | antisense  | CA7      | 281    | 6117     | 6.357892 | 7.646727 | 2        | 70.41708 | 74.11302 | 222.8995 | 1        | 4         | 6.2466803 | 6.5051064 | 6.3218884 | 7.662899   | 7.6306305 | 7.6466517 |
| 7.5833   | 0.0012 | 2.4433 |      | noncod | ENST0000   | natural    | 69.018   | 242.97 |          |          | 62.52474 |          |          |          | 242.2428 | 263.7860 |           |           |           |           |            |           |           |
| 7E-05    | 6185   | 074    | down | ing    | 0551187    | antisense  | CA7      | 281    | 6117     | 6.357892 | 7.646727 | 2        | 70.41708 | 74.11302 | 222.8995 | 1        | 4         | 6.2466803 | 6.5051064 | 6.3218884 | 7.662899   | 7.6306305 | 7.6466517 |
| 3.8872   | 0.0004 | 2.3752 |      | noncod |            | natural    | 135.24   | 476.77 |          |          | 132.2109 | 125.5995 |          |          | 470.6956 |          |           |           |           |           |            |           |           |
| 6E-06    | 13042  | 813    | down | ing    | uc003fua.2 | antisense  | ATP13A3  | 9632   | 3417     | 7.352529 | 8.600627 | 7        | 25       | 147.9384 | 454.7317 | 5        | 504.8929  | 7.356474  | 7.363718  | 7.3373938 | 8.669765   | 8.567358  | 8.564758  |
| 0.0005   | 0.0039 | 2.0509 |      | noncod | ENST0000   |            | 37.429   | 107.76 |          |          | 34.37656 | 41.95913 | 111.2250 | 107.8384 |          |          |           |           |           |           |            |           |           |
| 66572    | 54211  | 796    | down | ing    | 0437865    | intergenic | 566      | 5305   | 5.463955 | 6.500268 | 35.953   | 4        | 3        | 9        | 25       | 104.2324 | 5.442953  | 5.4542084 | 5.494703  | 6.6805964 | 6.495097   | 6.3251104 |           |
| 2.8976   | 0.0008 | 2.8786 |      | noncod | ENST0000   |            | 36.451   | 149.25 |          |          | 33.74408 | 34.18996 | 41.42111 |          | 150.4289 | 172.6849 |           |           |           |           |            |           |           |
| 5E-05    | 4204   | 385    | down | ing    | 0366140    | intergenic | 721      | 9003   | 5.423766 | 6.949152 | 7        | 4        | 2        | 124.6631 | 9        | 2        | 5.3493376 | 5.445181  | 5.476778  | 6.8377748 | 6.9630637  | 7.046618  |           |
| 0.0040   | 0.0147 | 2.1112 |      | noncod | ENST0000   | natural    | MCM3A    | 10.434 | 31.114   |          |          | 11.61677 |          |          |          | 36.81018 | 33.29142  |           |           |           |            |           |           |
| 40608    | 00798  | 382    | down | ing    | 0444998    | antisense  | P        | 339    | 121      | 3.619897 | 4.697987 | 1        | 9.904417 | 9.78183  | 23.24075 | 4        | 8         | 3.805516  | 3.6155956 | 3.4385803 | 4.463733   | 4.970549  | 4.659678  |
| 0.0001   | 0.0018 | 2.3164 |      | noncod | ENST0000   |            | 139.96   | 477.10 |          |          | 118.6680 | 171.7708 | 424.8470 | 492.8560 |          |          |           |           |           |           |            |           |           |
| 56038    | 28421  | 176    | down | ing    | 0566217    | intergenic | 4382     | 081    | 7.384446 | 8.596341 | 129.4542 | 76       | 7        | 5        | 8        | 513.5993 | 7.321094  | 7.278205  | 7.554039  | 8.571651  | 8.627896   | 8.589477  |           |
| 0.0005   | 0.0039 | 2.9058 |      | noncod |            | intronic   | 7.1621   | 28.674 |          |          | 5.562821 |          |          |          | 24.14741 |          |           |           |           |           |            |           |           |
| 75026    | 91668  | 348    | down | ing    | NR_046711  | antisense  | POU6F2   | 66     | 904      | 3.057317 | 4.59627  | 7.41217  | 4        | 8.511506 | 3        | 29.48929 | 32.38801  | 3.154076  | 2.7632878 | 3.2545874 | 4.5208163  | 4.6501746 | 4.6178184 |
| 0.0005   | 0.0039 | 2.9058 |      | noncod |            | intronic   | 7.1621   | 28.674 |          |          | 5.562821 |          |          |          | 24.14741 |          |           |           |           |           |            |           |           |
| 75026    | 91668  | 348    | down | ing    | NR_046711  | antisense  | POU6F2   | 66     | 904      | 3.057317 | 4.59627  | 7.41217  | 4        | 8.511506 | 3        | 29.48929 | 32.38801  | 3.154076  | 2.7632878 | 3.2545874 | 4.5208163  | 4.6501746 | 4.6178184 |
| 0.0007   | 0.0046 | 2.0108 |      | noncod |            | intronic   | 349.33   | 1088.1 |          |          | 350.6152 | 280.8809 | 416.4957 | 917.2773 | 1162.197 |          |           |           |           |           |            |           |           |
| 4454     | 88398  | 949    | down | ing    | uc001vfn.3 | antisense  | INTS6    | 0637   | 10147    | 8.733723 | 9.741561 | 3        | 2        | 6        | 4        | 1        | 1184.856  | 8.783673  | 8.550476  | 8.86702   | 9.646135   | 9.82799   | 9.750557  |
| 0.0007   | 0.0046 | 2.0108 |      | noncod |            | natural    | 349.33   | 1088.1 |          |          | 350.6152 | 280.8809 | 416.4957 | 917.2773 | 1162.197 |          |           |           |           |           |            |           |           |
| 4454     | 88398  | 949    | down | ing    | uc001vfn.3 | antisense  | INTS6    | 0637   | 10147    | 8.733723 | 9.741561 | 3        | 2        | 6        | 4        | 1        | 1184.856  | 8.783673  | 8.550476  | 8.86702   | 9.646135   | 9.82799   | 9.750557  |
| 0.0301   | 0.0660 | 2.1275 |      | noncod | ENST0000   | bidirectio | CAMSAP   | 8.5011 | 24.761   |          |          | 6.647501 | 12.06857 | 6.787408 |          | 28.36767 |           |           |           |           |            |           |           |
| 70187    | 76601  | 433    | down | ing    | 0423793    | nal        | 1        | 61     | 383      | 3.288211 | 4.3774   | 5        | 2        | 4        | 19.61586 | 8        | 26.30061  | 2.9965703 | 3.9114215 | 2.9566426 | 4.227593   | 4.593584  | 4.3110228 |
| 0.0060   | 0.0197 | 2.1614 |      | noncod |            | natural    | 16.618   | 50.483 |          |          | 20.00136 | 15.51500 | 14.34006 |          | 44.95203 |          |           |           |           |           |            |           |           |
| 68982    | 29316  | 119    | down | ing    | uc003nog.1 | antisense  | HLA-A    | 813    | 601      | 4.27858  | 5.390554 | 8        | 9        | 1        | 42.36592 | 4        | 64.13285  | 4.583483  | 4.282256  | 3.9700003 | 5.3073497  | 5.2517586 | 5.612553  |
| 0.0060   | 0.0197 | 2.1614 |      | noncod |            | natural    | 16.618   | 50.483 |          |          | 20.00136 | 15.51500 | 14.34006 |          | 44.95203 |          |           |           |           |           |            |           |           |
| 68982    | 29316  | 119    | down | ing    | uc003nog.1 | antisense  | HLA-A    | 813    | 601      | 4.27858  | 5.390554 | 8        | 9        | 1        | 42.36592 | 4        | 64.13285  | 4.583483  | 4.282256  | 3.9700003 | 5.3073497  | 5.2517586 | 5.612553  |
| 0.0001   | 0.0018 | 2.5915 |      | noncod | ENST0000   | natural    | 33.403   | 122.52 |          |          | 31.26651 | 33.10196 |          |          | 126.2908 |          |           |           |           |           |            |           |           |
| 55619    | 25875  | 631    | down | ing    | 0563278    | antisense  | SIN3A    | 096    | 689      | 5.303409 | 6.677231 | 35.84081 | 6        | 3        | 108.2061 | 133.0837 | 7         | 5.438374  | 5.3119564 | 5.1598964 | 6.6429596  | 6.7892904 | 6.5994444 |
| 0.0001   | 0.0018 | 2.5915 |      | noncod | ENST0000   | natural    | 33.403   | 122.52 |          |          | 31.26651 | 33.10196 |          |          | 126.2908 |          |           |           |           |           |            |           |           |
| 55619    | 25875  | 631    | down | ing    | 0563278    | antisense  | SIN3A    | 096    | 689      | 5.303409 | 6.677231 | 35.84081 | 6        | 3        | 108.2061 | 133.0837 | 7         | 5.438374  | 5.3119564 | 5.1598964 | 6.6429596  | 6.7892904 | 6.5994444 |
| 0.0001   | 0.0018 | 2.5915 |      | noncod | ENST0000   | natural    | 33.403   | 122.52 |          |          | 31.26651 | 33.10196 |          |          | 126.2908 |          |           |           |           |           |            |           |           |
| 55619    | 25875  | 631    | down | ing    | 0563278    | antisense  | MAN2C1   | 096    | 689      | 5.303409 | 6.677231 | 35.84081 | 6        | 3        | 108.2061 | 133.0837 | 7         | 5.438374  | 5.3119564 | 5.1598964 | 6.6429596  | 6.7892904 | 6.5994444 |
| 0.0001   | 0.0018 | 2.5915 |      | noncod | ENST0000   | natural    | 33.403   | 122.52 |          |          | 31.26651 | 33.10196 |          |          | 126.2908 |          |           |           |           |           |            |           |           |
| 55619    | 25875  | 631    | down | ing    | 0563278    | antisense  | MAN2C1   | 096    | 689      | 5.303409 | 6.677231 | 35.84081 | 6        | 3        | 108.2061 | 133.0837 | 7         | 5.438374  | 5.3119564 | 5.1598964 | 6.6429596  | 6.7892904 | 6.5994444 |
| 0.0001   | 0.0018 | 2.5915 |      | noncod | ENST0000   | natural    | 33.403   | 122.52 |          |          | 31.26651 | 33.10196 |          |          | 126.2908 |          |           |           |           |           |            |           |           |
| 55619    | 25875  | 631    | down | ing    | 0563278    | antisense  | SIN3A    | 096    | 689      | 5.303409 | 6.677231 | 35.84081 | 6        | 3        | 108.2061 | 133.0837 | 7         | 5.438374  | 5.3119564 | 5.1598964 | 6.6429596  | 6.7892904 | 6.5994444 |
| 0.0001   | 0.0016 | 2.4618 |      | noncod | ENST0000   |            | 58.916   | 209.15 |          |          | 51.54037 |          |          |          | 188.2673 |          |           |           |           |           |            |           |           |
| 30108    | 50653  | 93     | down | ing    | 0431981    | intergenic | 642      | 9693   | 6.122179 | 7.421947 | 58.49441 | 5        | 66.71514 | 193.5736 | 8        | 245.6381 | 6.1507516 | 6.0429688 | 6.1728163 | 7.4554224 | 7.269914   | 7.5405045 |           |
| 2.4418   | 0.0003 | 3.4907 |      | noncod |            |            | 392.79   | 2158.2 |          | 10.72996 |          |          |          | 425.0518 |          | 2250.011 | 2376.482  |           |           |           |            |           |           |
| 6E-06    | 67353  | 019    | down | ing    | uc001utv.3 | intergenic | 9373     | 86867  | 8.926446 | 3        | 393.8579 | 359.4884 | 2        | 1848.367 | 2        | 4        | 8.962129  | 8.919567  | 8.897642  | 10.648577 | 10.7846365 | 10.756676 |           |
| 0.0003   | 0.0029 | 2.0661 |      | noncod | ENST0000   | natural    | CTDSPL   | 181.57 | 561.99   |          |          | 194.2453 | 152.3626 | 198.1039 | 470.6766 | 588.4784 |           |           |           |           |            |           |           |
| 53312    | 66772  | 96     | down | ing    | 0560750    | antisense  | 2        | 0657   | 3073     | 7.769433 | 8.81641  | 9        | 7        | 1        | 7        | 5        | 626.8241  | 7.9070597 | 7.637979  | 7.763261  | 8.714774   | 8.871556  | 8.862901  |
|          |        |        |      |        |            | intron     |          |        |          |          |          |          |          |          |          |          |           |           |           |           |            |           |           |
| 0.0004   | 0.0035 | 2.5127 |      | noncod | ENST0000   | sense-ove  | C17orf10 | 13.998 | 48.425   |          |          | 14.50489 | 11.32797 | 16.16255 | 46.68882 | 50.15085 | 48.43673  |           |           |           |            |           |           |
| 70082    | 43082  | 148    | down | ing    | 0579188    | rlapping   | 1        | 473    | 471      | 4.023986 | 5.353233 | 1        | 05       | 8        | 4        | 6        | 3         | 4.1223726 | 3.8173096 | 4.1322765 | 5.4433975  | 5.409064  | 5.207238  |
|          |        |        |      |        |            | intron     |          |        |          |          |          |          |          |          |          |          |           |           |           |           |            |           |           |
| 0.0004   | 0.0035 | 2.5127 |      | noncod | ENST0000   | sense-ove  | C17orf10 | 13.998 | 48.425   |          |          | 14.50489 | 11.32797 | 16.16255 | 46.68882 | 50.15085 | 48.43673  |           |           |           |            |           |           |
| 70082    | 43082  | 148    | down | ing    | 0579188    | rlapping   | 1        | 473    | 471      | 4.023986 | 5.353233 | 1        | 05       | 8        | 4        | 6        | 3         | 4.1223726 | 3.8173096 | 4.1322765 | 5.4433975  | 5.409064  | 5.207238  |
| 0.0001   | 0.0015 | 2.0444 |      | noncod |            |            | 375.50   | 1208.0 |          |          | 367.4104 | 331.8568 | 427.2465 | 1001.804 |          | 1328.096 |           |           |           |           |            |           |           |
| 18749    | 73059  | 352    | down | ing    | NR_045026  | intergenic | 4607     | 10033  | 8.854905 | 9.886608 | 3        | 7        | 2        | 8        | 1294.129 | 3        | 8.854281  | 8.804669  | 8.905766  | 9.766023  | 9.977861   | 9.915939  |           |
| 0.0076   | 0.0235 | 2.6607 |      | noncod |            |            | 7.3506   | 26.865 |          |          | 5.307070 |          |          |          | 7.239350 | 25.78813 | 22.44684  |           |           |           |            |           |           |
| 81568    | 66702  | 815    | down | ing    | uc002nsx.1 | intergenic | 59       | 923    | 3.08551  | 4.497    |          |          |          |          |          |          |           |           |           |           |            |           |           |















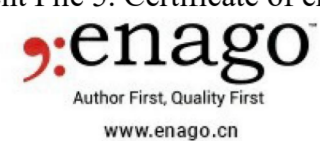

## CERTIFICATE OF EDITING

This is to certify that the paper titled Prognostic value of macrophage-associated long non-coding RNA expression for hepatocellular carcinoma commissioned to us by Guanyu Chen has been edited for English language, grammar, punctuation, and spelling by Enago, the editing brand of Crimson Interactive Consulting Co., Ltd.

- ✓ **ISO 17100:2015**  
Translation Service Providers
- ✓ **ISO 27001:2013**  
Information Security Management System
- ✓ **ISO 9001:2015**  
Quality Management System

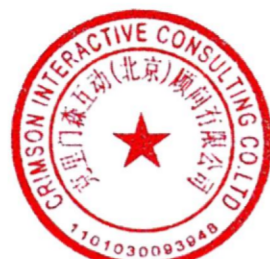

Issued by:  
Enago, Crimson Interactive (Beijing) Consulting Co., Ltd.  
Room 607, Zhucheng Building,  
No. 6 Zhongguancun South Street,  
Haidian District, Beijing

Disclaimer: The intent of the author's message has been preserved during the editing process. The author is free to accept or reject our changes in the document after reviewing our editing. This certificate has been awarded at the time of sharing the final edited version (full file or sections of the file) with the author. Enago does not bear any responsibility for any alterations done by the author to the edited document post 12 November 2021.

Japan [www.enago.jp](http://www.enago.jp), [www.ulatus.jp](http://www.ulatus.jp), [www.voxtab.jp](http://www.voxtab.jp)  
Taiwan [www.enago.tw](http://www.enago.tw), [www.ulatus.tw](http://www.ulatus.tw)  
China [www.enago.cn](http://www.enago.cn), [www.ulatus.cn](http://www.ulatus.cn)  
Brazil [www.enago.com.br](http://www.enago.com.br), [www.ulatus.com.br](http://www.ulatus.com.br)  
Germany [www.enago.de](http://www.enago.de)

Russia [www.enago.ru](http://www.enago.ru)  
Arabic [www.enago.ae](http://www.enago.ae)  
Turkey [www.enago.com.tr](http://www.enago.com.tr)  
S. Korea [www.enago.co.kr](http://www.enago.co.kr)  
Global [www.enago.com](http://www.enago.com), [www.ulatus.com](http://www.ulatus.com), [www.voxtab.com](http://www.voxtab.com)

About Crimson:  
Crimson Interactive Consulting Co. Ltd. is one of the world's leading academic research support services. Since 2005, we've supported over 2 million researchers in 125 countries with their publication goals.

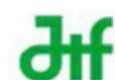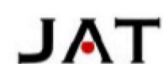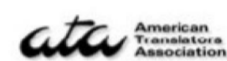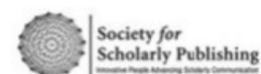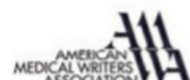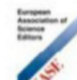

Supplement: Supplementary file 1 [file get_supplementary_file.php]
